# Supplementary material for: Feeding ecology and reproductive biology of small coastal sharks in Malaysian waters
Source: PeerJ journal article supplement (doi:10.7717/peerj.15849), 2023-08-21

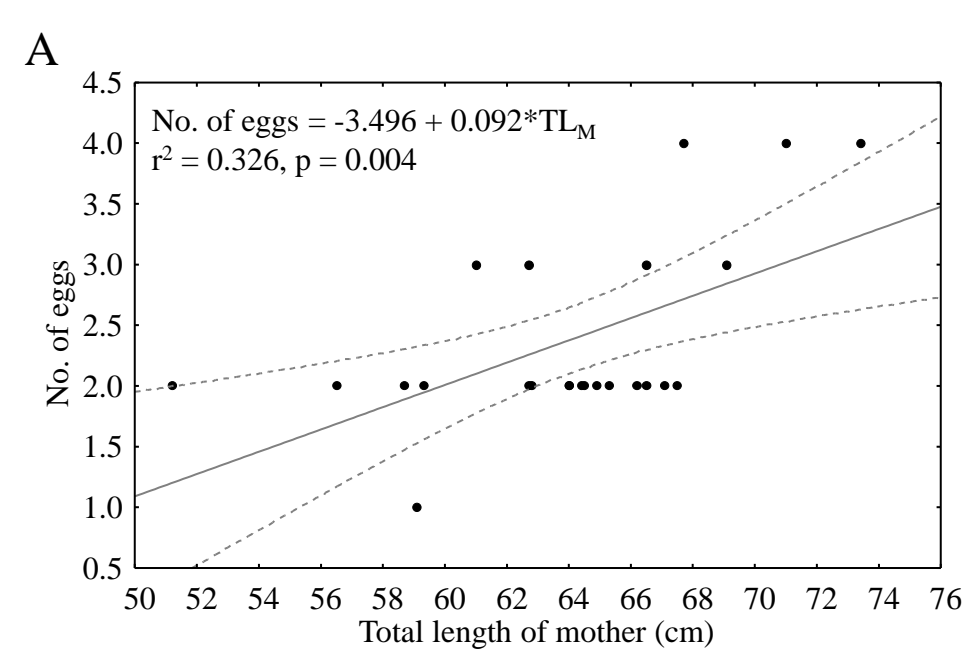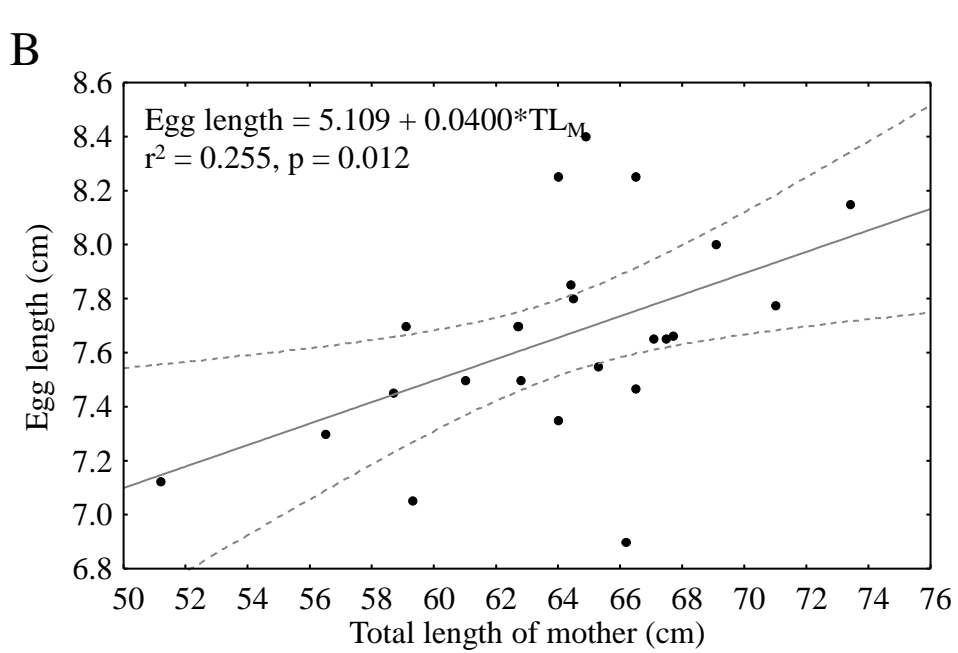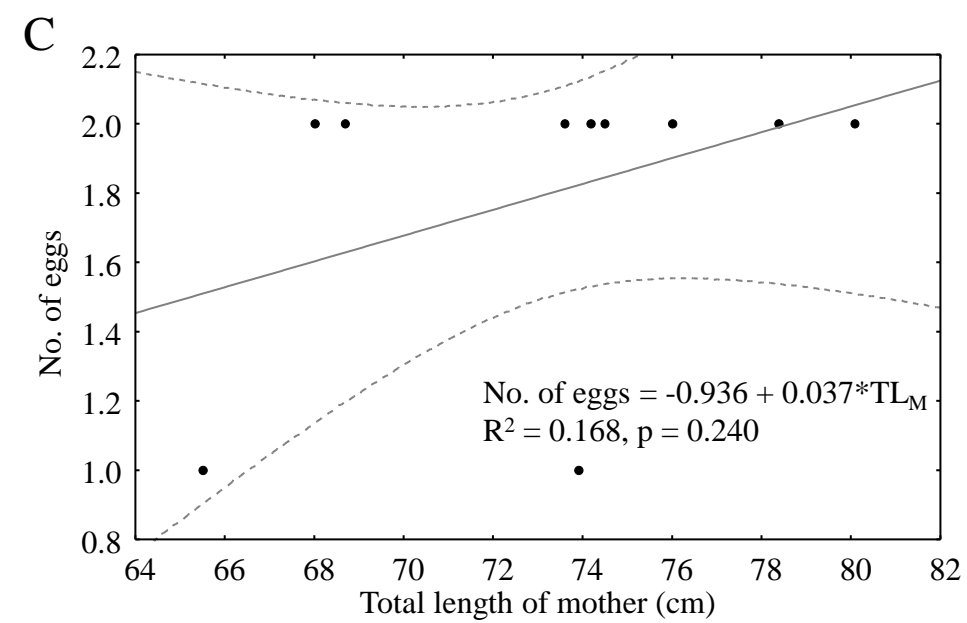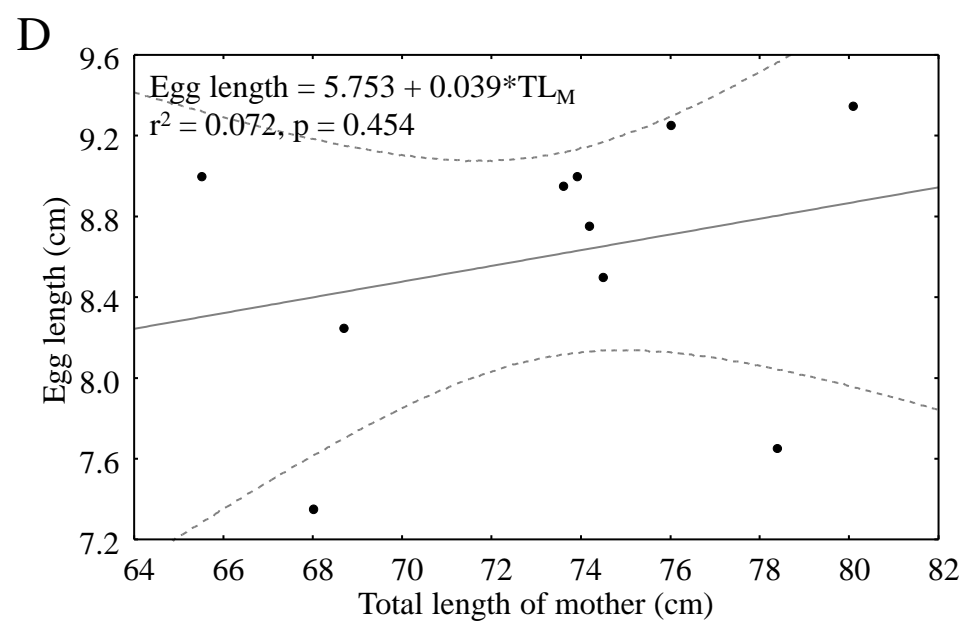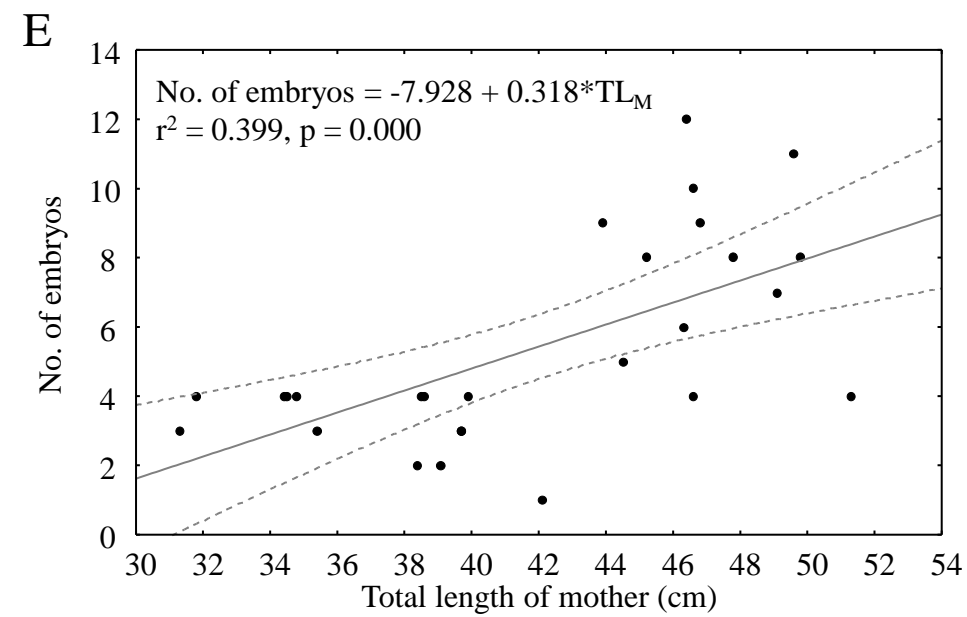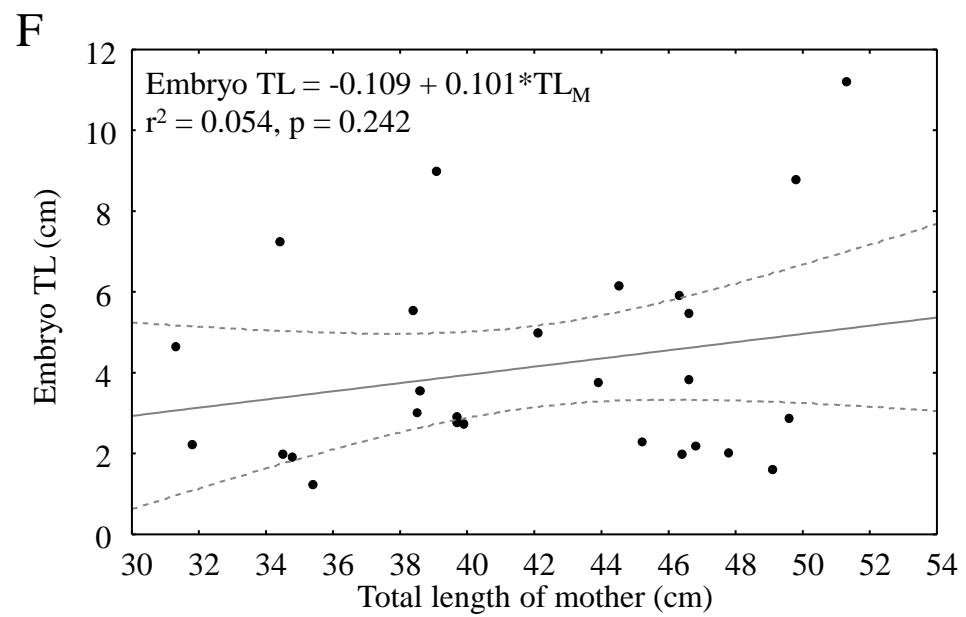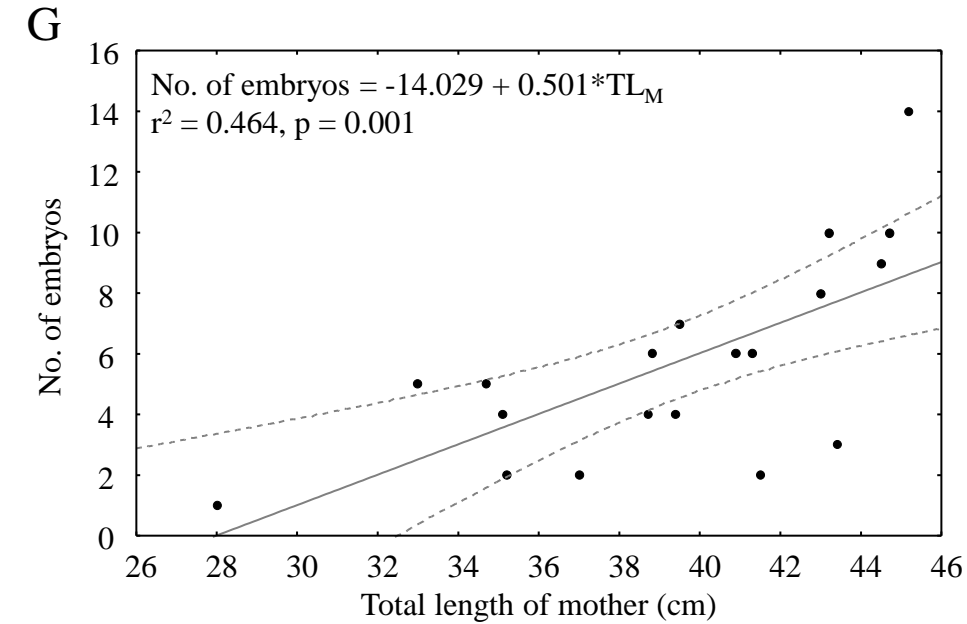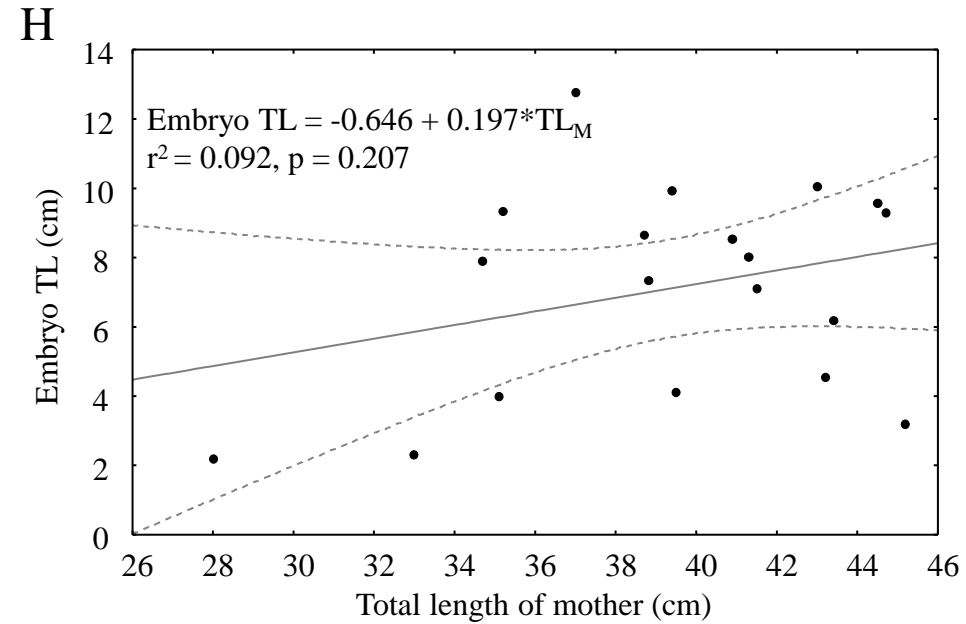

Supplement: Figure_S6_Reproductive_output.pdf [file Figure_S6_Reproductive_output.pdf]
