# Supplementary material for: Feeding ecology and reproductive biology of small coastal sharks in Malaysian waters
Source: PeerJ. 2023 Aug 21;11:e15849. doi: 10.7717/peerj.15849 (PMC10448880; doi:10.7717/peerj.15849)
Supplement: Supplemental Information 11 [file peerj-11-15849-s011.xlsx]

## Sheet: Diet
				Volume	Osteichthyes	Narcinidae	Anguiliformes	Mullidae	Caesionidae	Apogonidae	Ambassidae	Siganidae	Carangidae	Synodontidae	Sciaenidae	Cynoglossidae	Soleidae	Serranidae	Leiognathidae	Trichiuridae	Platycephalidae	Engraulidae	Nemipteridae	Mugilidae	Ammodytidae	Bregmacerotidae	Tetraodontidae	Clupeidae	Pinguipedidae	Penaeidae	Caridae	Sergestidae	Mysidacea	Alpheidae	Upogebiidae	Stomatopoda	Crab	Portunidae	Calappidae	Pinnotheridae		Paguroidae	Amphipoda	Calanoida	Ostracoda	Cephalopoda	Cephalopoda	Sepiolidae	Cephalopoda
Species	Code	Sex	Maturity	Size (TL/DW)	Fish	Electric ray	eel	Goat fish	Fusilier	Cardinal	Glass	Rabbit fish	Trevally	lizard	Sciaenid	Tongue sole	Flatfish	Grouper	ponyfish	Cutlassfish	Flathead	Anchovy	Sea bream	Mullet	Sandlances	codlets	pufferfish	Shads	Sand perch	Penaeid	Caridean	acetes	Mysid	pistol prawn	Mudshrimp	Mantis	Brachyura	swimming crab	Box crab	Pea crab	Long leg crab	Hermit	Amphipod	Calanoid	Ostracod	Unknown cephalopod	Squid	Bobtail squid	Cuttlefish
Chiloscyllium hasseltii	041115HM38	F	Adult	60
Chiloscyllium hasseltii	271016HM4	F	Adult	66.5
Chiloscyllium hasseltii	051115HM17	F	Sub adult	52
Chiloscyllium hasseltii	041115HM37	F	Sub adult	50
Chiloscyllium punctatum	041115HM28	F	Adult	79.5
Chiloscyllium punctatum	270116HM9	F	Adult	79.2
Chiloscyllium punctatum	220316HM14	F	Adult	78.4
Chiloscyllium punctatum	041115HM35	F	Juvenile	41
Chiloscyllium punctatum	041115HM14	F	Juvenile	36.5
Chiloscyllium punctatum	051115HM5	F	Sub adult	56.1
Chiloscyllium punctatum	230316HM17	F	Sub adult	65.7
Chiloscyllium punctatum	173-1	M	Adult	75.8
Chiloscyllium punctatum	230316HM14	M	Adult	93.3
Chiloscyllium punctatum	110116HM9	M	Adult	77
Chiloscyllium punctatum	271016HM2	M	Adult	75.1
Chiloscyllium punctatum	041115HM32	M	Juvenile	51.5
Chiloscyllium punctatum	041115HM6	M	Sub adult	65.5
Chiloscyllium punctatum	220316HM9	M	Sub adult	77.5
Scoliodon laticaudus	160515Pke4	F	Adult	32.6
Scoliodon laticaudus	071015PPe8	F	Adult	32.5
Scoliodon laticaudus	071015PPe2	F	Adult	40.5
Scoliodon laticaudus	051115HM10	F	Adult	37
Scoliodon laticaudus	270116SK7	F	Adult	47.8
Scoliodon macrorhynchos	161215MK20	F	Adult	43
Scoliodon laticaudus	270116SK13	F	Adult	38.6
Scoliodon laticaudus	270116SK9	F	Adult	48.1
Scoliodon macrorhynchos	151215MK7	F	Adult	43
Scoliodon laticaudus	270116SK10	F	Adult	40
Scoliodon laticaudus	240616PPe2	F	Adult	36.9
Scoliodon macrorhynchos	161215MK3	F	Adult	27.3
Scoliodon laticaudus	071015PPe7	F	Sub adult	27.9
Scoliodon laticaudus	071015PPe4	M	Adult	31
Scoliodon laticaudus	071015PPe3	M	Adult	36.4
Scoliodon laticaudus	071015PPe5	M	Adult	34.4
Scoliodon laticaudus	051115PPe4	M	Adult	35
Scoliodon laticaudus	051115PPe8	M	Adult	36.5
Scoliodon laticaudus	110116HM5	M	Adult	39
Scoliodon laticaudus	110116HM41	M	Adult	34.2
Scoliodon laticaudus	271016SK6	M	Adult	31.5
Scoliodon laticaudus	270116SK4	M	Adult	35.3
Scoliodon laticaudus	230316PPe3	M	Adult	30.1
Scoliodon laticaudus	240616PPe1	M	Adult	32.5
Scoliodon laticaudus	071015PPe11	M	Sub adult	27
Scoliodon macrorhynchos	161215MK4	M	Sub adult	26.7
Chiloscyllium hasseltii	051115HM14	F	Adult	60																										4500
Chiloscyllium hasseltii	240616HM9	F	Adult	55																																										2400
Chiloscyllium hasseltii	220316HM31	F	Adult	56.5																																	3000
Chiloscyllium hasseltii	270416HM3	F	Adult	67.5																										5200
Chiloscyllium hasseltii	220316HM32	F	Adult	62.7				28500
Chiloscyllium hasseltii	230316HM10	F	Adult	65.3	13000
Chiloscyllium hasseltii	110116HM18	F	Adult	64	8000																										160															48
Chiloscyllium hasseltii	240616HM8	F	Adult	71																																	13000
Chiloscyllium hasseltii	220316HM5	F	Adult	54.6	3400																																									200
Chiloscyllium hasseltii	230316HM6	F	Adult	51.2	1200
Chiloscyllium hasseltii	240616HM7	F	Adult	73.4				16000						26000
Chiloscyllium hasseltii	100816HM33	F	Adult	67.7	18000			13500																																							8000
Chiloscyllium hasseltii	271016HM12	F	Adult	62.7				13000																																							11500
Chiloscyllium hasseltii	110816HM17	F	Adult	67.1	7000																				4500						400
Chiloscyllium hasseltii	240616HM5	F	Adult	64										15000																																12
Chiloscyllium hasseltii	010915HM1	F	Adult	59	3000																																										16000
Chiloscyllium hasseltii	020915HM14	F	Adult	76.8				42000								6000																															39000
Chiloscyllium hasseltii	071015HM20	F	Adult	51.9
Chiloscyllium hasseltii	051115HM22	F	Adult	58										8500		10100														5000
Chiloscyllium hasseltii	110116HM14	F	Adult	66.2										81500
Chiloscyllium hasseltii	100816HM8	F	Adult	64.9	53000								18000			13000														16000
Chiloscyllium hasseltii	100816HM34	F	Adult	66.5	4500									4500																																	20000
Chiloscyllium hasseltii	110816HM18	F	Adult	64.4				6000															12000							7000																	40000
Chiloscyllium hasseltii	100816HM10	F	Adult	53.1											9000				7000			2000								44000																600
Chiloscyllium hasseltii	100816HM9	F	Adult	59.1									37000									1100								20000																48
Chiloscyllium hasseltii	280416HM16	F	Adult	62.8	1700															3500																											50000
Chiloscyllium hasseltii	230316HM11	F	Adult	58.7																																		6500
Chiloscyllium hasseltii	280416HM3	F	Adult	67.8													20000																				2700
Chiloscyllium hasseltii	050416MK10	F	Adult	61																		1000																	18500
Chiloscyllium hasseltii	110816HM20	F	Juvenile	47.5	2200																																									36
Chiloscyllium hasseltii	230316PPe1	F	Juvenile	38.5																																	2100									150
Chiloscyllium hasseltii	240616HM30	F	Juvenile	48.3	4500		5500
Chiloscyllium hasseltii	041115HM43	F	Juvenile	46.8			2000																																									9000
Chiloscyllium hasseltii	100816HM13	F	Juvenile	44.9															4400											4600																	19000
Chiloscyllium hasseltii	270116HM7	F	Sub adult	43.2																																										1000
Chiloscyllium hasseltii	100816HM36	F	Sub adult	40.6	800
Chiloscyllium hasseltii	270116HM20	F	Sub adult	49.4	2600
Chiloscyllium hasseltii	270116HM4	F	Sub adult	39.8																											550															50
Chiloscyllium hasseltii	051115HM13	F	Sub adult	54.7																																										5000
Chiloscyllium hasseltii	280716HM34	F	Sub adult	54.5
Chiloscyllium hasseltii	280416HM18	F	Sub adult	60.4	200
Chiloscyllium hasseltii	220316HM27	F	Sub adult	50.3			3000																																							2000
Chiloscyllium hasseltii	280416HM20	F	Sub adult	42.6	1700																																									16
Chiloscyllium hasseltii	220316HM28	F	Sub adult	47.2	9500																																									20
Chiloscyllium hasseltii	280416HM24	F	Sub adult	37.8	800		350																							1350		200															3200
Chiloscyllium hasseltii	010915HM2	F	Sub adult	51.5										16000								2800				600			10000																		40
Chiloscyllium hasseltii	010915HM3	F	Sub adult	45.7			400															3000																									10000
Chiloscyllium hasseltii	051115HM21	F	Sub adult	46										5000																																8
Chiloscyllium hasseltii	051115HM23	F	Sub adult	52.5												5200																																5400
Chiloscyllium hasseltii	220316HM3	F	Sub adult	47.5															4000						17000
Chiloscyllium hasseltii	100816HM12	F	Sub adult	44.9	800																									18000	20						2000
Chiloscyllium hasseltii	270116HM5	F	Sub adult	45	5000																										72										700						11000
Chiloscyllium hasseltii	110116HM20	F	Sub adult	40.8	1700																									2000							3000									200
Chiloscyllium hasseltii	280416HM22	F	Sub adult	41.9	6500
Chiloscyllium hasseltii	110116HM15	F	Sub adult	58.1	7500																									1200
Chiloscyllium hasseltii	110116HM21	F	Sub adult	41.7	5000																																									32
Chiloscyllium hasseltii	270116HM6	F	Sub adult	42.2	900																										600																3600
Chiloscyllium hasseltii	041115HM45	M	Adult	67.3	7200																																									150
Chiloscyllium hasseltii	220316HM33	M	Adult	62	2144																																									2152
Chiloscyllium hasseltii	230316HM8	M	Adult	78																		11000														116										1800
Chiloscyllium hasseltii	100816HM31	M	Adult	77.5	192																																									6000
Chiloscyllium hasseltii	220316HM30	M	Adult	55.6																																										3900
Chiloscyllium hasseltii	271016HM5	M	Adult	59.3																																											4000
Chiloscyllium hasseltii	230316HM9	M	Adult	65																																										9000
Chiloscyllium hasseltii	071015HM19	M	Adult	57.5	5000																																											5000
Chiloscyllium hasseltii	220316HM6	M	Adult	72.5	4000			15000											5000		4000									4000
Chiloscyllium hasseltii	110816HM16	M	Adult	70.5	18000								5000																																		11000
Chiloscyllium hasseltii	280416HM4	M	Adult	75.5									23000									2400																									1700
Chiloscyllium hasseltii	270716HM16	M	Adult	80.6										40000																3000
Chiloscyllium hasseltii	280416HM2	M	Adult	69.3												5500																														200		7000
Chiloscyllium hasseltii	240616HM2	M	Adult	74									16000																																	16
Chiloscyllium hasseltii	020915HM1	M	Adult	71.8	4000						10000			60000																																	28000
Chiloscyllium hasseltii	051115HM15	M	Adult	62.6								4500		18000
Chiloscyllium hasseltii	271016HM3	M	Adult	74.1											40000	30000																															66000
Chiloscyllium hasseltii	271016HM10	M	Adult	74.9	26000																																										57000	14000	9000
Chiloscyllium hasseltii	100816HM7	M	Adult	70			17000								23000				13000	30000										1700																	35000
Chiloscyllium hasseltii	230316HM1	M	Adult	71.6	26000									30000
Chiloscyllium hasseltii	100816HM32	M	Adult	73.5	16000			5000																																							62000
Chiloscyllium hasseltii	280416HM17	M	Adult	65.5							4000			54000		5000			3000
Chiloscyllium hasseltii	280416HM7	M	Adult	58.1							2500																																				40000
Chiloscyllium hasseltii	230316HM12	M	Adult	55.8	14000																																									8
Chiloscyllium hasseltii	051115PPe3	M	Juvenile	43.4	800
Chiloscyllium hasseltii	041115HM41	M	Juvenile	53	500
Chiloscyllium hasseltii	041115HM39	M	Juvenile	40	300																																									300
Chiloscyllium hasseltii	051115HM26	M	Juvenile	42.5	2000
Chiloscyllium hasseltii	280416HM23	M	Juvenile	43.1																																										1700
Chiloscyllium hasseltii	110116HM19	M	Juvenile	49																																										4200
Chiloscyllium hasseltii	230316HM7	M	Juvenile	47.4																																										1700
Chiloscyllium hasseltii	110116HM12	M	Juvenile	47.1	32																																400									8
Chiloscyllium hasseltii	100816HM35	M	Juvenile	46.5																																										800
Chiloscyllium hasseltii	051115HM19	M	Juvenile	56	4000																																										100
Chiloscyllium hasseltii	051115HM12	M	Juvenile	53.2
Chiloscyllium hasseltii	041115HM44	M	Juvenile	44	2000
Chiloscyllium hasseltii	230316HM13	M	Juvenile	51.1																																	6000									8
Chiloscyllium hasseltii	110116HM16	M	Juvenile	44																																										1800
Chiloscyllium hasseltii	220316HM29	M	Juvenile	47.5																																	2800									200
Chiloscyllium hasseltii	041115HM42	M	Juvenile	45	4000
Chiloscyllium hasseltii	051115PPe2	M	Juvenile	44.7	7000
Chiloscyllium hasseltii	051115HM18	M	Juvenile	48.5																																											3000
Chiloscyllium hasseltii	110816HM19	M	Juvenile	52.9												5500														2400							1900									20
Chiloscyllium hasseltii	100816HM11	M	Juvenile	50												7500														2500
Chiloscyllium hasseltii	280716HM33	M	Juvenile	45.2				4000														1000
Chiloscyllium hasseltii	271016HM7	M	Juvenile	46.5	6200																																700									900
Chiloscyllium hasseltii	051115HM20	M	Juvenile	56.5																										2000																		5000
Chiloscyllium hasseltii	051115HM16	M	Juvenile	56.2												6000
Chiloscyllium hasseltii	051115HM11	M	Juvenile	56.6	6000																																										2000
Chiloscyllium hasseltii	271016HM11	M	Juvenile	60				34000										4000																													32000
Chiloscyllium hasseltii	271016HM6	M	Juvenile	47.7												6000																															16500	10000
Chiloscyllium hasseltii	110116HM17	M	Juvenile	46.7																		2400								1300							1100										24000	3000
Chiloscyllium hasseltii	280416HM21	M	Juvenile	40.9	1100																									4400
Chiloscyllium hasseltii	020915HM2	M	Sub adult	51.9
Chiloscyllium hasseltii	240616HM28	M	Sub adult	54.7																																						5000
Chiloscyllium hasseltii	220316HM26	M	Sub adult	57.7	4000
Chiloscyllium hasseltii	280716HM32	M	Sub adult	59.6
Chiloscyllium hasseltii	270116HM21	M	Sub adult	54.8												2400										4400
Chiloscyllium hasseltii	010915SK1	M	Sub adult	66.7	500		4000
Chiloscyllium hasseltii	020915HM15	M	Sub adult	56.5																					5000
Chiloscyllium hasseltii	071015HM16	M	Sub adult	52			20000
Chiloscyllium hasseltii	041115HM40	M	Sub adult	65																		13000
Chiloscyllium hasseltii	051115PPe1	M	Sub adult	62.4						4500						20000						8000																									1000
Chiloscyllium hasseltii	280716HM31	M	Sub adult	63.6	2000			9000						18000		9000								23000						1100																		4000
Chiloscyllium hasseltii	220316HM4	M	Sub adult	49																					7000
Chiloscyllium hasseltii	270116HM2	M	Sub adult	44.8	2800																																										3700
Chiloscyllium hasseltii	280416HM6	M	Sub adult	56.9	1200		2000									9000
Chiloscyllium hasseltii	270116HM3	M	Sub adult	44.7	400																									4500																8
Chiloscyllium punctatum	071015HM12	F	Adult	79.3																																											5000
Chiloscyllium punctatum	071015HM10	F	Adult	76.8																																										2000
Chiloscyllium punctatum	041115HM17	F	Adult	64.5																																	2300
Chiloscyllium punctatum	041115HM27	F	Adult	70.5																																										3500
Chiloscyllium punctatum	270716HM15	F	Adult	69.3
Chiloscyllium punctatum	191-1	F	Adult																																											2600
Chiloscyllium punctatum	050416MK1	F	Adult	76																																		20000
Chiloscyllium punctatum	230316HM16	F	Adult	68.7
Chiloscyllium punctatum	270716HM13	F	Adult	74.2																																											24500
Chiloscyllium punctatum	050416MK5	F	Adult	70																																	1800
Chiloscyllium punctatum	050416MK2	F	Adult	65.5																																	1200		7000
Chiloscyllium punctatum	041115HM26	F	Adult	80.5			2000
Chiloscyllium punctatum	041115HM1	F	Adult	76																																													50000
Chiloscyllium punctatum	270116HM11	F	Adult	76.7																																	5000										125000
Chiloscyllium punctatum	271016HM18	F	Adult	73.5	3000																																										78000
Chiloscyllium punctatum	270716HM14	F	Adult	80.1
Chiloscyllium punctatum	220316HM12	F	Adult	66.1																		800
Chiloscyllium punctatum	271016HM1	F	Adult	73.6																																	16000
Chiloscyllium punctatum	041115HM34	F	Juvenile	49
Chiloscyllium punctatum	220316HM25	F	Juvenile	40.3																																										2200
Chiloscyllium punctatum	020915HM4	F	Juvenile	49.5																																										200
Chiloscyllium punctatum	041115HM22	F	Juvenile	37.4																																	1000									32
Chiloscyllium punctatum	280716HM54	F	Juvenile	42.2																											650																1700
Chiloscyllium punctatum	051115HM24	F	Juvenile	58
Chiloscyllium punctatum	041115HM13	F	Juvenile	45.5
Chiloscyllium punctatum	041115HM24	F	Juvenile	47.4																																											14000
Chiloscyllium punctatum	041115HM30	F	Juvenile	39	2600
Chiloscyllium punctatum	020915HM17	F	Sub adult	52.5																																										2000
Chiloscyllium punctatum	041115HM10	F	Sub adult	44	1600
Chiloscyllium punctatum	041115HM19	F	Sub adult	48																																										600
Chiloscyllium punctatum	041115HM2	F	Sub adult	48.3	1800
Chiloscyllium punctatum	041115HM25	F	Sub adult	42.3																																										1400
Chiloscyllium punctatum	270116HM12	F	Sub adult	60																																		4400
Chiloscyllium punctatum	110116HM8	F	Sub adult	50.4																																										4600
Chiloscyllium punctatum	110116HM11	F	Sub adult	48.5																																		1000								3000
Chiloscyllium punctatum	220316HM7	F	Sub adult	59.9																																										4700
Chiloscyllium punctatum	220316HM23	F	Sub adult	47.5																																										3800
Chiloscyllium punctatum	110116HM10	F	Sub adult	47.9																																										2000
Chiloscyllium punctatum	270116HM15	F	Sub adult	48.4	1600																																									1000
Chiloscyllium punctatum	220316HM8	F	Sub adult	47.7																																										1600
Chiloscyllium punctatum	220316HM13	F	Sub adult	64.4																																										3400
Chiloscyllium punctatum	050416MK9	F	Sub adult	64																																	2300
Chiloscyllium punctatum	220316HM24	F	Sub adult	46	1200
Chiloscyllium punctatum	110816HM23	F	Sub adult	58																																										3900
Chiloscyllium punctatum	220316HM2	F	Sub adult	46.9																																										1000
Chiloscyllium punctatum	220316HM10	F	Sub adult	53																																										3800
Chiloscyllium punctatum	041115HM29	F	Sub adult	46.5
Chiloscyllium punctatum	220316HM21	F	Sub adult	70.5
Chiloscyllium punctatum	100816HM14	F	Sub adult	61																																		4000								3000
Chiloscyllium punctatum	280716HM36	F	Sub adult	54.9																																	2500											6000
Chiloscyllium punctatum	010915HM4	F	Sub adult	59.1																																		14000
Chiloscyllium punctatum	020915HM3	F	Sub adult	75.3																																											55000
Chiloscyllium punctatum	041115HM20	F	Sub adult	55.5	2800																																											4800
Chiloscyllium punctatum	041115HM16	F	Sub adult	55																																												26000
Chiloscyllium punctatum	110116HM13	F	Sub adult	66.4																		600																										6600
Chiloscyllium punctatum	42-1	M	Adult	77.5																																											1000
Chiloscyllium punctatum	270116HM10	M	Adult	78.8																																											22000
Chiloscyllium punctatum	270116HM8	M	Adult	94																																										6400
Chiloscyllium punctatum	240616HM24	M	Adult	89.3																																										5000
Chiloscyllium punctatum	230316HM15	M	Adult	81.9																																										16
Chiloscyllium punctatum	280416HM13	M	Adult	86.8																																										13000
Chiloscyllium punctatum	220316HM11	M	Adult	68.5
Chiloscyllium punctatum	280716HM35	M	Adult	76.8																																										9400
Chiloscyllium punctatum	110816HM21	M	Adult	82.8	104																																									8600
Chiloscyllium punctatum	100816HM26	M	Adult	79.8
Chiloscyllium punctatum	240616HM25	M	Adult	94.8																																											30000
Chiloscyllium punctatum	280716HM37	M	Adult	69.7																																											5000
Chiloscyllium punctatum	240616HM1	M	Adult	86.4
Chiloscyllium punctatum	280716HM52	M	Adult	87			7500																																								6000
Chiloscyllium punctatum	270716HM12	M	Adult	81.5																																											52000
Chiloscyllium punctatum	050416MK8	M	Adult	74																																	5000
Chiloscyllium punctatum	071015HM11	M	Adult	84.5			2000												5000																												21000	4000
Chiloscyllium punctatum	041115HM8	M	Adult	73																																											15000
Chiloscyllium punctatum	041115HM21	M	Adult	77
Chiloscyllium punctatum	271016HM17	M	Adult	84.8	6500																																										100000
Chiloscyllium punctatum	110816HM22	M	Adult	89.5																																			3500								12000
Chiloscyllium punctatum	100816HM27	M	Adult	69.1	5000
Chiloscyllium punctatum	010915HM6	M	Juvenile	47																																										2000
Chiloscyllium punctatum	041115HM36	M	Juvenile	42
Chiloscyllium punctatum	041115HM31	M	Juvenile	56.6																																											3200
Chiloscyllium punctatum	051115HM4	M	Juvenile	53																																											500
Chiloscyllium punctatum	041115HM5	M	Juvenile	38	20
Chiloscyllium punctatum	041115HM18	M	Juvenile	53																																										1200
Chiloscyllium punctatum	051115HM25	M	Juvenile	53																																										1400
Chiloscyllium punctatum	40-1	M	Juvenile	57.5																																										1500
Chiloscyllium punctatum	240616HM26	M	Juvenile	58.1
Chiloscyllium punctatum	271016HM19	M	Juvenile	61.5																																										2400
Chiloscyllium punctatum	100816HM30	M	Juvenile	50.1																																										5000
Chiloscyllium punctatum	270416HM2	M	Juvenile	47																																										700
Chiloscyllium punctatum	271016HM9	M	Juvenile	46.9																																3600										8
Chiloscyllium punctatum	110816HM25	M	Juvenile	49.1																																	2300									300
Chiloscyllium punctatum	101E-2	M	Juvenile	14.2
Chiloscyllium punctatum	40-2	M	Juvenile	54																																		1000
Chiloscyllium punctatum	041115HM23	M	Juvenile	39																																	1800									4
Chiloscyllium punctatum	271016HM20	M	Juvenile	65.8																																											17000
Chiloscyllium punctatum	280716HM53	M	Juvenile	64.7
Chiloscyllium punctatum	100816HM28	M	Juvenile	50.8																																	3600									1700
Chiloscyllium punctatum	010915HM7	M	Juvenile	30.5																												200														600
Chiloscyllium punctatum	041115HM15	M	Juvenile	32																																											3000
Chiloscyllium punctatum	240616HM27	M	Juvenile	53.8																																	4700
Chiloscyllium punctatum	280416HM15	M	Juvenile	42.7																																										3600
Chiloscyllium punctatum	100816HM29	M	Juvenile	49																																										4000
Chiloscyllium punctatum	041115HM4	M	Juvenile	48.5																												48
Chiloscyllium punctatum	041115HM33	M	Juvenile	57.5	4000
Chiloscyllium punctatum	010915HM5	M	Sub adult	50.7																																										1600
Chiloscyllium punctatum	071015HM15	M	Sub adult	45																																										2400
Chiloscyllium punctatum	071015HM13	M	Sub adult	70.5																																										5000
Chiloscyllium punctatum	071015HM9	M	Sub adult	44.9																																										4000
Chiloscyllium punctatum	041115HM7	M	Sub adult	62																											60
Chiloscyllium punctatum	041115HM12	M	Sub adult	60																																										4000
Chiloscyllium punctatum	041115HM11	M	Sub adult	58.5
Chiloscyllium punctatum	270116HM13	M	Sub adult	57.2
Chiloscyllium punctatum	270116HM14	M	Sub adult	54.6																																										3300
Chiloscyllium punctatum	020915HM16	M	Sub adult	85.2																																										7000
Chiloscyllium punctatum	041115HM9	M	Sub adult	38																																										500
Chiloscyllium punctatum	051115HM6	M	Sub adult	51.6																																	1700
Chiloscyllium punctatum	220316HM22	M	Sub adult	60																																											10000
Chiloscyllium punctatum	071015HM14	M	Sub adult	60.7																																												7000
Chiloscyllium punctatum	270116HM22	M	Sub adult	41.5																																	1800
Chiloscyllium punctatum	110816HM24	M	Sub adult	56.6																																										1800		2100
Chiloscyllium punctatum	041115HM3	M	Sub adult	66																																												6000
Chiloscyllium punctatum	173-3	M	Adult	87.8			9000																																									5000
Chiloscyllium punctatum	173-2	M	Adult	74.5																																												9000
Scoliodon laticaudus	010915HM22	F	Adult	29.8	600
Scoliodon laticaudus	010915HM16	F	Adult	27																												800
Scoliodon laticaudus	010915HM19	F	Adult	31.6
Scoliodon laticaudus	05115HM8	F	Adult	39.5																																8
Scoliodon laticaudus	051115HM7	F	Adult	36	1000																																2000
Scoliodon macrorhynchos	161215MK19	F	Adult	44.7																										2600
Scoliodon laticaudus	270116SK11	F	Adult	49.1	2900																											72
Scoliodon laticaudus	280716HM20	F	Adult	46.3																											300
Scoliodon macrorhynchos	151215MK2	F	Adult	39.5																																1800
Scoliodon macrorhynchos	161215MK2	F	Adult	28																																									4
Scoliodon laticaudus	280716HM18	F	Adult	39.7																										500																500
Scoliodon macrorhynchos	151215MK3	F	Adult	35.1	920																															928
Scoliodon laticaudus	280716HM21	F	Adult	44.8	600																											400				3000										16
Scoliodon laticaudus	280716HM13	F	Adult	42.2	1000																															8	840									840
Scoliodon laticaudus	110816HM5	F	Adult	42.8																										1800																16
Scoliodon laticaudus	271016SK4	F	Adult	46.6
Scoliodon laticaudus	280716HM17	F	Adult	48.4																											1100					100										16
Scoliodon laticaudus	271016SK2	F	Adult	46.8																		1000
Scoliodon laticaudus	110816HM3	F	Adult	41.4	900																																									2100
Scoliodon laticaudus	110116HM6	F	Adult	37.8	2000
Scoliodon macrorhynchos	161215MK6	F	Adult	31.3	600																									600
Scoliodon laticaudus	270116SB4	F	Adult	39.1	4000
Scoliodon laticaudus	280716HM14	F	Adult	35.2	3200
Scoliodon macrorhynchos	060416MK6	F	Adult	30.6																																	600
Scoliodon laticaudus	280416SB7	F	Adult	31.3	1000																																									16
Scoliodon macrorhynchos	060416MK8	F	Adult	30																																	300									1200
Scoliodon macrorhynchos	060416MK23	F	Adult	27.4	2600
Scoliodon laticaudus	110116HM46	F	Adult	34.5																																										300
Scoliodon laticaudus	110116HM43	F	Adult	34.8																																										800
Scoliodon laticaudus	110116HM49	F	Adult	29.5																																										700
Scoliodon laticaudus	110116HM51	F	Adult	27.7																																										1000
Scoliodon laticaudus	110116HM50	F	Adult	28.5																										1000						12										1100
Scoliodon macrorhynchos	040416MK5	F	Adult	37																																500
Scoliodon laticaudus	110116HM44	F	Adult	27.7	200
Scoliodon macrorhynchos	060416MK7	F	Adult	28.5	2000																											24
Scoliodon laticaudus	280416SB2	F	Adult	43																																2000
Scoliodon macrorhynchos	161215MK10	F	Adult	24.4	100
Scoliodon macrorhynchos	161215MK7	F	Adult	24																																		80
Scoliodon laticaudus	010915HM14	F	Adult	32.5																												76
Scoliodon laticaudus	010915HM10	F	Adult	32.2	1000
Scoliodon laticaudus	010915HM17	F	Adult	28.2	150
Scoliodon laticaudus	010915HM21	F	Adult	30.5
Scoliodon macrorhynchos	060416MK1	F	Adult	35.2								3500
Scoliodon macrorhynchos	161215MK17	F	Adult	45.2	5000																																32
Scoliodon macrorhynchos	161215MK16	F	Adult	44.5	16																									400								1900
Scoliodon macrorhynchos	050416MK36	F	Adult	31.6
Scoliodon laticaudus	270116SK15	F	Adult	29.3	1																											64														8
Scoliodon laticaudus	280716HM11	F	Adult	45.2																										4000																48
Scoliodon laticaudus	270116SK12	F	Adult	38.4	800																																									400
Scoliodon macrorhynchos	151215MK5	F	Adult	35.5												6000
Scoliodon macrorhynchos	030416MK14	F	Adult	41.6	600																																										4500
Scoliodon laticaudus	270116SK14	F	Adult	42.1											2100																3600
Scoliodon laticaudus	270116SK8	F	Adult	36.1	1500																															2500										8
Scoliodon laticaudus	110116HM48	F	Adult	28.1																											1300
Scoliodon laticaudus	240616PPe4	F	Adult	32.7																																										1200
Scoliodon laticaudus	010915HM12	F	Adult	28.7																										2500		36				6
Scoliodon laticaudus	010915HM20	F	Adult	30.1	4000
Scoliodon laticaudus	010915HM18	F	Adult	31	1800
Scoliodon laticaudus	270116SB3	F	Adult	39.7																										4500
Scoliodon laticaudus	280716HM12	F	Adult	46.5																										5000																	1000
Scoliodon laticaudus	110816HM6	F	Adult	38.9	900																					4000					600	300
Scoliodon laticaudus	010915HM13	F	Adult	32.5								2200																		500	500															4
Scoliodon laticaudus	010915HM11	F	Adult	32.5							3600
Scoliodon laticaudus	010915HM15	F	Adult	28.8																											3400						800								2
Scoliodon laticaudus	071015PPe9	F	Adult	35.4																										3000																8
Scoliodon laticaudus	051115PPe11	F	Adult	28.5																																10000
Scoliodon laticaudus	280716HM16	F	Adult	51.3																																16000
Scoliodon laticaudus	271016SK1	F	Adult	49.8																		4000						6000				400
Scoliodon laticaudus	240616PPe7	F	Adult	33	5000																									2500
Scoliodon laticaudus	270116SB1	F	Adult	38.5																										11300
Scoliodon macrorhynchos	030416MK7	F	Adult	41.1																																											13000
Scoliodon laticaudus	271016SK3	F	Adult	43.9																		3000										4200
Scoliodon laticaudus	280416PPe3	F	Adult	49.6																										1700							1300									16
Scoliodon macrorhynchos	060416MK10	F	Adult	34.4																																										100
Scoliodon laticaudus	280716HM19	F	Adult	44.5	14000
Scoliodon laticaudus	270116SB2	F	Adult	45.7																										4000						3000										20
Scoliodon macrorhynchos	040416MK7	F	Adult	32.8																								5000								2000
Scoliodon macrorhynchos	161215MK21	F	Adult	38.7												11500															4000
Scoliodon macrorhynchos	161215MK18	F	Adult	43.2																		1900								2500
Scoliodon macrorhynchos	040416MK3	F	Adult	35																										4600
Scoliodon laticaudus	280716HM22	F	Adult	34.9																						1400				2500	56															72
Scoliodon laticaudus	280716HM27	F	Adult	34.4							7000																					76
Scoliodon macrorhynchos	161215MK9	F	Adult	26																										5500
Scoliodon laticaudus	110816PPe3	F	Adult	40																										3100
Scoliodon laticaudus	280716HM23	F	Adult	31.3																										2000	1000															3400
Scoliodon macrorhynchos	161215MK22	F	Adult	41.3	1300																									3500
Scoliodon laticaudus	110116HM45	F	Adult	30.2																											2300
Scoliodon macrorhynchos	040416MK4	F	Adult	32																																2200
Scoliodon laticaudus	110116HM47	F	Adult	30.7	7000																										400
Scoliodon macrorhynchos	161215MK11	F	Adult	24																																	1200
Scoliodon laticaudus	160515PKE8	F	Juvenile	15.8																										44																8
Scoliodon laticaudus	051115PPe14	F	Juvenile	25.4
Scoliodon macrorhynchos	161215MK14	F	Juvenile	21.7																																2000
Scoliodon macrorhynchos	151215MK1	F	Juvenile	23.4																										600
Scoliodon laticaudus	051115PPe18	F	Juvenile	26.5								3400
Scoliodon macrorhynchos	030416MK9	F	Juvenile	26.2																																											11500
Scoliodon macrorhynchos	151215MK4	F	Juvenile	24.7																										3600
Scoliodon laticaudus	230316PPe13	F	Sub adult	26.5	3000
Scoliodon laticaudus	280716HM28	F	Sub adult	27	1000																										500														6	4
Scoliodon macrorhynchos	161215MK12	F	Sub adult	22.3																										800
Scoliodon laticaudus	071015PPe6	F	Adult	30																																										700
Scoliodon laticaudus	051115PPe12	F	Sub adult	27.5																																										800
Scoliodon macrorhynchos	161215MK8	F	Sub adult	26																																	120
Scoliodon laticaudus	041115SB7	M	Adult	36.4	2000
Scoliodon laticaudus	041115SB1	M	Adult	35
Scoliodon laticaudus	051115PPe7	M	Adult	35.3																																										400
Scoliodon laticaudus	051115HM9	M	Adult	34.7	800
Scoliodon laticaudus	041115SB6	M	Adult	35.5	300																																									900
Scoliodon laticaudus	041115SB5	M	Adult	37																											1000															20
Scoliodon laticaudus	240616PPe8	M	Adult	34.8	1300																																							0.25		1300
Scoliodon laticaudus	240616PPe6	M	Adult	33.9
Scoliodon laticaudus	270116SK6	M	Adult	34.6																												112														2500
Scoliodon laticaudus	110116HM27	M	Adult	31.2																											800															40
Scoliodon laticaudus	110116HM24	M	Adult	36																											300
Scoliodon laticaudus	240616PPe3	M	Adult	31.9	400
Scoliodon laticaudus	270116SK5	M	Adult	33.9
Scoliodon macrorhynchos	060416MK22	M	Adult	31.2	1400
Scoliodon laticaudus	110116HM39	M	Adult	33.6																																											600
Scoliodon macrorhynchos	151215MK8	M	Adult	26.4
Scoliodon laticaudus	110116HM34	M	Adult	31.2																																										56
Scoliodon laticaudus	110116HM33	M	Adult	34.5																																	1500
Scoliodon laticaudus	270116SK2	M	Adult	35.9	900
Scoliodon laticaudus	110116HM30	M	Adult	36																																										250
Scoliodon laticaudus	280416SB1	M	Adult	35	16																									1000																4
Scoliodon macrorhynchos	030416MK11	M	Adult	30.5																		1000
Scoliodon laticaudus	270116SK1	M	Adult	34.9																											20
Scoliodon laticaudus	110116HM26	M	Adult	30.6	600
Scoliodon laticaudus	240616PPe9	M	Adult	32.6																																										200
Scoliodon laticaudus	051115PPe13	M	Adult	33.8																										1000
Scoliodon laticaudus	041115SB2	M	Adult	37.5																																											1400
Scoliodon laticaudus	240616PPe5	M	Adult	30.2																																						600
Scoliodon macrorhynchos	030416MK17	M	Adult	32.3																							700
Scoliodon laticaudus	110116HM32	M	Adult	32																																1800										4
Scoliodon laticaudus	110116HM31	M	Adult	30.6																											1400															16
Scoliodon laticaudus	280716HM24	M	Adult	38.5	3000																					800					1000
Scoliodon laticaudus	110116HM25	M	Adult	36.2																											1800
Scoliodon laticaudus	110116HM37	M	Adult	36.5	1200																										1200															200
Scoliodon laticaudus	110116HM42	M	Adult	31.7																											1800
Scoliodon laticaudus	230316PPe4	M	Adult	28.5																																										1000
Scoliodon laticaudus	110116HM36	M	Adult	32.7																											32					1600										28
Scoliodon laticaudus	051115PPe16	M	Adult	33	400																																600
Scoliodon macrorhynchos	040416MK2	M	Adult	31.5																		2700
Scoliodon laticaudus	110116HM22	M	Adult	34.4	300																										2000
Scoliodon macrorhynchos	030416MK16	M	Adult	35.8												2800
Scoliodon laticaudus	271016SK5	M	Adult	41.2																		2800										300
Scoliodon laticaudus	110116HM40	M	Adult	29.5																											1200
Scoliodon laticaudus	041115SB8	M	Adult	35.3																																6500
Scoliodon laticaudus	041115SB3	M	Adult	36																		3000
Scoliodon laticaudus	051115PPe17	M	Adult	35.2																																		3000
Scoliodon macrorhynchos	030416MK2	M	Adult	31.1																																											11000
Scoliodon laticaudus	270116SK3	M	Adult	34.3																		3400														20											6000
Scoliodon macrorhynchos	040416MK1	M	Adult	35.5																																											14500
Scoliodon macrorhynchos	030416MK13	M	Adult	32.8	500																																										8500
Scoliodon macrorhynchos	030416MK12	M	Adult	31.5																																											7500
Scoliodon laticaudus	230316PPe8	M	Adult	28.6																2800
Scoliodon laticaudus	110116HM29	M	Juvenile	29
Scoliodon laticaudus	110116HM35	M	Juvenile	26.1																																										50
Scoliodon macrorhynchos	030416MK10	M	Juvenile	22.7	200																											12
Scoliodon laticaudus	160515Pke6	M	Juvenile	19																36										2000
Scoliodon laticaudus	160515Pke7	M	Juvenile	17.8																																											12
Scoliodon macrorhynchos	050416MK33	M	Juvenile	26.8	3000
Scoliodon macrorhynchos	050416MK35	M	Juvenile	28																																											17000
Scoliodon macrorhynchos	161215MK13	M	Juvenile	22.8																										2200
Scoliodon macrorhynchos	161215MK5	M	Juvenile	23.5												4500
Scoliodon laticaudus	071015PPe10	M	Sub adult	27.3																																										20
Scoliodon laticaudus	051115PPe10	M	Sub adult	32.3	700																																									700
Scoliodon laticaudus	051115PPe5	M	Sub adult	36.5	600																																									100
Scoliodon laticaudus	110116HM23	M	Sub adult	29.6																																										800
Scoliodon laticaudus	110116HM28	M	Sub adult	29.3																											800
Scoliodon laticaudus	051115PPe6	M	Sub adult	32	32																																1800									20
Scoliodon laticaudus	110116HM38	M	Sub adult	28.4																											600															700
Scoliodon macrorhynchos	050416MK34	M	Sub adult	27.3																		3200																								2200
Scoliodon macrorhynchos	030416MK6	M	Sub adult	29.8	2300																															1500
Scoliodon macrorhynchos	030416MK4	M	Sub adult	26.5																																		900
Scoliodon macrorhynchos	030416MK5	M	Sub adult	31.5																										10000
Scoliodon laticaudus	230316PPe2	M	Sub adult	24.6																										1400
[truncated: 123 more columns]

## Sheet: Reproduction
Date	Month	Station/ Location	Site	Site 2	Sample code	Species	Sex	Rank	Maturity	Mat2	Total Length (cm)	Standard length (cm)	Weight (g)	LgTL	LgW	Liver (g)	Gonad (g)	HSI	GSI
2015-05-16	1505	Pulau Ketam	Selangor	WP	160515Pke-4	Scoliodon laticaudus	F	1	Ang	A	32.6	24.6	129.75	1.51322	2.11311	4.32		3.32948
2015-05-16	1505	Pulau Ketam	Selangor	WP	160515Pke-5	Scoliodon laticaudus	M	1	A	A	27.1	20.8	70.4	1.43297	1.84757	2.39		3.39489
2015-05-16	1505	Pulau Ketam	Selangor	WP	160515Pke-6	Scoliodon laticaudus	M	0	J	J	19	14.3	21.38	1.27875	1.33001	0.39		1.82413
2015-05-16	1505	Pulau Ketam	Selangor	WP	160515Pke-7	Scoliodon laticaudus	M	0	J	J	17.8	13.5	21.22	1.25042	1.32675	0.91		4.28841
2015-05-16	1505	Pulau Ketam	Selangor	WP	160515Pke-8	Scoliodon laticaudus	F	0	J	J	15.8	13	13.69	1.19866	1.1364
2015-09-01	1509	Sekincan	Selangor	WP	010915SK-1	Chiloscyllium hasseltii	M	0	S	S	66.7	48	1327.05	1.82413	3.12289	73.85	7.83	5.56497	0.590031
2015-09-01	1509	Hutan Melintang	HM	WP	010915HM-1	Chiloscyllium hasseltii	F	1	Ag	A	59	42.8	995.2	1.77085	2.99791	29.25	50.52	2.93911	5.07637
2015-09-01	1509	Hutan Melintang	HM	WP	010915HM-2	Chiloscyllium hasseltii	F	0	S	S	51.5	38.5	556.01	1.71181	2.74508	26.8		4.82006
2015-09-01	1509	Hutan Melintang	HM	WP	010915HM-3	Chiloscyllium hasseltii	F	0	S	S	45.7	32.5	352.81	1.65992	2.54754	12.29	3.94	3.48346	1.11675
2015-09-01	1509	Hutan Melintang	HM	WP	010915HM-4	Chiloscyllium punctatum	F	0	S	S	59.1	42.5	774.5	1.77159	2.88902	29.84	5.68	3.85281	0.733376
2015-09-01	1509	Hutan Melintang	HM	WP	010915HM-5	Chiloscyllium punctatum	M	0	S	S	50.7	35.8	511.59	1.70501	2.70892	19.96	2.25	3.90156	0.439805
2015-09-01	1509	Hutan Melintang	HM	WP	010915HM-6	Chiloscyllium punctatum	M	0	J	J	47	33.1	380.38	1.6721	2.58022	11.82		3.10742
2015-09-01	1509	Hutan Melintang	HM	WP	010915HM-7	Chiloscyllium punctatum	M	0	J	J	30.5	21	103.38	1.4843	2.01444	2.93	0.64	2.8342	0.619075
2015-09-01	1509	Hutan Melintang	HM	WP	010915HM-10	Scoliodon laticaudus	F	1	Ang	A	32.2	24	133.59	1.50786	2.12577	4.3	0.8	3.2188	0.598847
2015-09-01	1509	Hutan Melintang	HM	WP	010915HM-11	Scoliodon laticaudus	F	1	Ang	A	32.5	24.6	152.98	1.51188	2.18463	5.29	0.88	3.45797	0.575239
2015-09-01	1509	Hutan Melintang	HM	WP	010915HM-12	Scoliodon laticaudus	F	1	Ang	A	28.7	21.6	100.52	1.45788	2.00225	4.12		4.09869
2015-09-01	1509	Hutan Melintang	HM	WP	010915HM-13	Scoliodon laticaudus	F	1	Ang	A	32.5	24.5	138.91	1.51188	2.14273	5.32	0.78	3.82982	0.561515
2015-09-01	1509	Hutan Melintang	HM	WP	010915HM-14	Scoliodon laticaudus	F	1	Ang	A	32.5	24.2	138.43	1.51188	2.14123	6.16		4.4499
2015-09-01	1509	Hutan Melintang	HM	WP	010915HM-15	Scoliodon laticaudus	F	1	Ang	A	28.8	22	87.56	1.45939	1.94231	2.32		2.64961
2015-09-01	1509	Hutan Melintang	HM	WP	010915HM-16	Scoliodon laticaudus	F	1	Ang	A	27	20.5	68.21	1.43136	1.83385	2.06		3.02009
2015-09-01	1509	Hutan Melintang	HM	WP	010915HM-17	Scoliodon laticaudus	F	1	Ang	A	28.2	21.2	101.73	1.45025	2.00745	3.43		3.37167
2015-09-01	1509	Hutan Melintang	HM	WP	010915HM-18	Scoliodon laticaudus	F	1	Ang	A	31	23.7	107.09	1.49136	2.02975	3.73		3.48305
2015-09-01	1509	Hutan Melintang	HM	WP	010915HM-19	Scoliodon laticaudus	F	1	Ag	A	31.6	23.5	132.26	1.49969	2.12143	5.52		4.1736
2015-09-01	1509	Hutan Melintang	HM	WP	010915HM-20	Scoliodon laticaudus	F	1	Ang	A	30.1	23	113.18	1.47857	2.05377	4.05		3.57837
2015-09-01	1509	Hutan Melintang	HM	WP	010915HM-21	Scoliodon laticaudus	F	1	Ang	A	30.5	23	114.18	1.4843	2.05759	3.61		3.16167
2015-09-01	1509	Hutan Melintang	HM	WP	010915HM-22	Scoliodon laticaudus	F	1	Ang	A	29.8	22.2	86.35	1.47422	1.93626	2.95		3.41633
2015-09-02	1509	Hutan Melintang	HM	WP	020915HM-1	Chiloscyllium hasseltii	M	1	A	A	71.8	51.8	1695.48	1.85612	3.22929	51.23	15.1	3.02156	0.890603
2015-09-02	1509	Hutan Melintang	HM	WP	020915HM-2	Chiloscyllium hasseltii	M	0	S	S	51.9	36.9	542.04	1.71517	2.73403	15.04	4.06	2.7747	0.749022
2015-09-02	1509	Hutan Melintang	HM	WP	020915HM-3	Chiloscyllium punctatum	F	0	S	S	75.3	53.4	1786	1.87679	3.25188	54.19	11.24	3.03415	0.629339
2015-09-02	1509	Hutan Melintang	HM	WP	020915HM-4	Chiloscyllium punctatum	F	0	J	J	49.5	34.5	458.76	1.69461	2.66159	11.13	0.71	2.42611	0.154765
2015-09-02	1509	Hutan Melintang	HM	WP	020915HM-14	Chiloscyllium hasseltii	F	1	Ag	A	76.8	56.8	2020.31	1.88536	3.30542	77.76	117.37	3.84891	5.8095
2015-09-02	1509	Hutan Melintang	HM	WP	020915HM-15	Chiloscyllium hasseltii	M	0	S	S	56.5	32.9	366.58	1.75205	2.56417	11.3	3.34	3.08255	0.911124
2015-09-02	1509	Hutan Melintang	HM	WP	020915HM-16	Chiloscyllium punctatum	M	0	S	S	85.2	60.8	3102.63	1.93044	3.49173	129.65	35.3	4.17871	1.13774
2015-09-02	1509	Hutan Melintang	HM	WP	020915HM-17	Chiloscyllium punctatum	F	0	S	S	52.5	36.8	590.5	1.72016	2.77122	21.1	5.61	3.57324	0.950042
2015-10-07	1510	Hutan Melintang	HM	WP	071015HM-9	Chiloscyllium punctatum	M	0	S	S	44.9	32.5	329.03	1.65225	2.51724	9.21	1.79	2.79914	0.544023
2015-10-07	1510	Hutan Melintang	HM	WP	071015HM-10	Chiloscyllium punctatum	F	1	Ang	A	76.8	55.5	1891.57	1.88536	3.27682	104	16.79	5.49808	0.887622
2015-10-07	1510	Hutan Melintang	HM	WP	071015HM-11	Chiloscyllium punctatum	M	1	A	A	84.5	60.4	2563.04	1.92686	3.40876	58.26	23.69	2.27308	0.924293
2015-10-07	1510	Hutan Melintang	HM	WP	071015HM-12	Chiloscyllium punctatum	F	1	Ag	A	79.3	36.9	2305.93	1.89927	3.36285	77.8	113.98	3.37391	4.94291
2015-10-07	1510	Hutan Melintang	HM	WP	071015HM-13	Chiloscyllium punctatum	M	0	S	S	70.5	50.5	1350.63	1.84819	3.13054	45.97	7.83	3.4036	0.579729
2015-10-07	1510	Hutan Melintang	HM	WP	071015HM-14	Chiloscyllium punctatum	M	0	S	S	60.7	43.7	795.79	1.78319	2.9008	25.67	5.13	3.22573	0.644642
2015-10-07	1510	Hutan Melintang	HM	WP	071015HM-15	Chiloscyllium punctatum	M	0	S	S	45	31	386.95	1.65321	2.58765	16.37	3.92	4.23052	1.01305
2015-10-07	1510	Hutan Melintang	HM	WP	071015HM-16	Chiloscyllium hasseltii	M	0	S	S	52	37.8	531.14	1.716	2.72521	10.92	3.99	2.05596	0.751214
2015-10-07	1510	Hutan Melintang	HM	WP		Chiloscyllium punctatum	M	0	S	S	64	54		1.80618
2015-10-07	1510	Sungai Besar	Selangor	WP	071015HM-19	Chiloscyllium hasseltii	M	1	A	A	57.5	47.3	912.65	1.75967	2.9603	31.79	7.38	3.48326	0.808634
2015-10-07	1510	Sungai Besar	Selangor	WP	071015HM-20	Chiloscyllium hasseltii	F	1	Ag	A	51.9	61.3	1268.94	1.71517	3.10344	94.17	41.73	7.42115	3.28857
2015-10-07	1510	Pasir Penambang	Selangor	WP	071015PPe-2	Scoliodon laticaudus	F	1	Ag	A	40.5	30.5	237.91	1.60746	2.37641	8.66	1.18	3.64003	0.495986
2015-10-07	1510	Pasir Penambang	Selangor	WP	071015PPe-3	Scoliodon laticaudus	M	1	A	A	36.4	27.5	171.16	1.5611	2.2334	6.69	1.26	3.90862	0.736153
2015-10-07	1510	Pasir Penambang	Selangor	WP	071015PPe-4	Scoliodon laticaudus	M	1	A	A	31	23.5	105.06	1.49136	2.02144	2.37	0.83	2.25585	0.790025
2015-10-07	1510	Pasir Penambang	Selangor	WP	071015PPe-5	Scoliodon laticaudus	M	1	A	A	34.4	26	131.85	1.53656	2.12008	3.4	1.72	2.57869	1.30451
2015-10-07	1510	Pasir Penambang	Selangor	WP	071015PPe-6	Scoliodon laticaudus	F	1	A	A	30	22.5	98.49	1.47712	1.99339	2.48		2.51802
2015-10-07	1510	Pasir Penambang	Selangor	WP	071015PPe-7	Scoliodon laticaudus	F	0	S	S	27.9	21.2	80.88	1.4456	1.90784	3.63	0.25	4.48813	0.3091
2015-10-07	1510	Pasir Penambang	Selangor	WP	071015PPe-8	Scoliodon laticaudus	F	1	Ag	A	32.5	24.5	120.76	1.51188	2.08192	4.8		3.97483
2015-10-07	1510	Pasir Penambang	Selangor	WP	071015PPe-9	Scoliodon laticaudus	F	1	Ang	A	35.4	26.5	169.58	1.549	2.22937	5.99		3.53226
2015-10-07	1510	Pasir Penambang	Selangor	WP	071015PPe-10	Scoliodon laticaudus	M	0	S	S	27.3	20.6	66.68	1.43616	1.824	1.36	0.4	2.03959	0.59988
2015-10-07	1510	Pasir Penambang	Selangor	WP	071015PPe-11	Scoliodon laticaudus	M	0	S	S	27	25.5	65.84	1.43136	1.81849	1.73	0.82	2.62758	1.24544
2015-10-27	1510	Kuantan	Kuantan	EP		Chiloscyllium punctatum	M	1	A	A	86.5	63		1.93702
2015-10-27	1510	Kuantan	Kuantan	EP		Chiloscyllium punctatum	M	0	J	J	71.5	51		1.85431
2015-10-27	1510	Kuantan	Kuantan	EP		Chiloscyllium punctatum	M	1	A	A	84	62		1.92428
2015-10-27	1510	Kuantan	Kuantan	EP		Chiloscyllium punctatum	M	0	S	S	78	55.5		1.89209
2015-10-27	1510	Kuantan	Kuantan	EP		Chiloscyllium punctatum	M	1	A	A	90	67.5		1.95424
2015-10-27	1510	Kuantan	Kuantan	EP		Chiloscyllium hasseltii	F	1	Ag	A	58	43		1.76343
2015-10-27	1510	Kuantan	Kuantan	EP		Chiloscyllium hasseltii	M	0	J	J	49	35.5		1.6902
2015-10-27	1510	Kuantan	Kuantan	EP		Chiloscyllium hasseltii	M	1	A	A	60	45		1.77815
2015-10-27	1510	Kuantan	Kuantan	EP		Chiloscyllium hasseltii	M	0	J	J	45	32		1.65321
2015-10-27	1510	Kuantan	Kuantan	EP		Chiloscyllium hasseltii	M	0	J	J	49	35.5		1.6902
2015-10-27	1510	Kuantan	Kuantan	EP		Chiloscyllium hasseltii	M	0	S	S	62	44		1.79239
2015-10-27	1510	Kuantan	Kuantan	EP		Chiloscyllium punctatum	M	0	S	S	75	54		1.87506
2015-10-27	1510	Kuantan	Kuantan	EP		Chiloscyllium punctatum	M	0	J	J	46	31.5		1.66276
2015-10-27	1510	Kuantan	Kuantan	EP		Chiloscyllium punctatum	M	0	J	J	59	32		1.77085
2015-10-28	1510	Kuantan	Kuantan	EP		Chiloscyllium punctatum	M	0	J	J	66	46		1.81954
2015-10-28	1510	Kuantan	Kuantan	EP		Chiloscyllium punctatum	M	0	S	S	72	52		1.85733
2015-10-29	1510	Kuantan	Kuantan	EP		Chiloscyllium punctatum	M	1	A	A	71	53.5		1.85126
2015-10-29	1510	Kuantan	Kuantan	EP		Chiloscyllium punctatum	M	1	A	A	64.5	46.5		1.80956
2015-10-29	1510	Kuantan	Kuantan	EP		Chiloscyllium punctatum	M	0	J	J	66.5	48		1.82282
2015-10-29	1510	Kuantan	Kuantan	EP		Chiloscyllium punctatum	M	1	A	A	63	45		1.79934
2015-10-29	1510	Kuantan	Kuantan	EP		Chiloscyllium punctatum	M	1	A	A	64.5	46.5		1.80956
2015-10-29	1510	Kuantan	Kuantan	EP		Chiloscyllium punctatum	M	0	S	S	65.5	47		1.81624
2015-10-29	1510	Kuantan	Kuantan	EP		Chiloscyllium punctatum	M	0	S	S	61	43		1.78533
2015-10-29	1510	Kuantan	Kuantan	EP		Chiloscyllium punctatum	M	0	S	S	65	48		1.81291
2015-10-29	1510	Kuantan	Kuantan	EP		Chiloscyllium punctatum	M	0	S	S	58.5	42		1.76716
2015-10-29	1510	Kuantan	Kuantan	EP		Chiloscyllium punctatum	M	1	A	A	69	60		1.83885
2015-10-29	1510	Kuantan	Kuantan	EP		Chiloscyllium punctatum	M	1	A	A	72	63		1.85733
2015-10-29	1510	Kuantan	Kuantan	EP		Chiloscyllium punctatum	M	0	S	S	58	42		1.76343
2015-10-29	1510	Kuantan	Kuantan	EP		Chiloscyllium punctatum	M	1	A	A	67	49.5		1.82607
2015-10-29	1510	Kuantan	Kuantan	EP		Chiloscyllium punctatum	M	0	J	J	58	41		1.76343
2015-10-29	1510	Kuantan	Kuantan	EP		Chiloscyllium punctatum	M	1	A	A	79	56.5		1.89763
2015-10-29	1510	Kuantan	Kuantan	EP		Chiloscyllium punctatum	M	1	A	A	85	61		1.92942
2015-10-29	1510	Kuantan	Kuantan	EP		Chiloscyllium punctatum	M	1	A	A	90.5	65		1.95665
2015-10-29	1510	Kuantan	Kuantan	EP		Chiloscyllium punctatum	M	0	S	S	69	50		1.83885
2015-10-29	1510	Kuantan	Kuantan	EP		Chiloscyllium punctatum	M	0	S	S	73	52.5		1.86332
2015-10-29	1510	Kuantan	Kuantan	EP		Chiloscyllium punctatum	M	1	A	A	97.5	73		1.989
2015-10-29	1510	Kuantan	Kuantan	EP		Chiloscyllium punctatum	M	1	A	A	80	59		1.90309
2015-10-29	1510	Kuantan	Kuantan	EP		Chiloscyllium punctatum	M	1	A	A	83.5	61		1.92169
2015-10-29	1510	Kuantan	Kuantan	EP		Chiloscyllium punctatum	M	1	A	A	76.5	56		1.88366
2015-10-29	1510	Kuantan	Kuantan	EP		Chiloscyllium punctatum	M	1	A	A	80.5	59		1.9058
2015-10-29	1510	Kuantan	Kuantan	EP		Chiloscyllium punctatum	M	1	A	A	80	59		1.90309
2015-10-29	1510	Kuantan	Kuantan	EP		Chiloscyllium punctatum	M	0	J	J	66	47		1.81954
2015-10-29	1510	Kuantan	Kuantan	EP		Chiloscyllium punctatum	M	1	A	A	79	56		1.89763
2015-10-29	1510	Kuantan	Kuantan	EP		Chiloscyllium punctatum	M	0	J	J	71	50		1.85126
2015-10-29	1510	Kuantan	Kuantan	EP		Chiloscyllium punctatum	M	1	A	A	88	64		1.94448
2015-10-29	1510	Kuantan	Kuantan	EP		Chiloscyllium punctatum	M	1	A	A	83.5	61		1.92169
2015-10-29	1510	Kuantan	Kuantan	EP		Chiloscyllium punctatum	M	1	A	A	90	67		1.95424
2015-10-29	1510	Kuantan	Kuantan	EP		Chiloscyllium punctatum	M	1	A	A	82	59		1.91381
2015-10-29	1510	Kuantan	Kuantan	EP		Chiloscyllium punctatum	M	0	S	S	80.5	59		1.9058
2015-10-29	1510	Kuantan	Kuantan	EP		Chiloscyllium punctatum	M	1	A	A	81	60		1.90849
2015-10-29	1510	Kuantan	Kuantan	EP		Chiloscyllium punctatum	M	1	A	A	88	65		1.94448
2015-10-29	1510	Kuantan	Kuantan	EP		Chiloscyllium punctatum	M	1	A	A	86	62		1.9345
2015-10-29	1510	Kuantan	Kuantan	EP		Chiloscyllium punctatum	M	1	A	A	77	56		1.88649
2015-10-29	1510	Kuantan	Kuantan	EP		Chiloscyllium punctatum	M	1	A	A	79	58		1.89763
2015-10-29	1510	Kuantan	Kuantan	EP		Chiloscyllium punctatum	F	1	Ag	A	83	60		1.91908
2015-10-29	1510	Kuantan	Kuantan	EP		Chiloscyllium hasseltii	M	1	A	A	71	53		1.85126
2015-10-30	1510	Kuantan	Kuantan	EP		Chiloscyllium hasseltii	F	1	Ag	A	57.5	41.5		1.75967
2015-10-30	1510	Kuantan	Kuantan	EP		Chiloscyllium hasseltii	M	0	S	S	54	39		1.73239
2015-10-30	1510	Kuantan	Kuantan	EP		Chiloscyllium punctatum	M	1	A	A	92	68		1.96379
2015-10-30	1510	Kuantan	Kuantan	EP		Chiloscyllium punctatum	M	1	A	A	78	55.5		1.89209
2015-11-04	1511	Hutan Melintang	HM	WP	041115HM1	Chiloscyllium punctatum	F	1	Ag	A	76	55	1766.8	1.88081	3.24719	48.9	28.97	2.76772	1.63969
2015-11-04	1511	Hutan Melintang	HM	WP	041115HM2	Chiloscyllium punctatum	F	0	S	S	48.3	35	463.6	1.68395	2.66614	19.25	4.24	4.15229	0.914582
2015-11-04	1511	Hutan Melintang	HM	WP	041115HM3	Chiloscyllium punctatum	M	0	S	S	66	40	731.82	1.81954	2.8644	22.59	5.3	3.08682	0.724222
2015-11-04	1511	Hutan Melintang	HM	WP	041115HM4	Chiloscyllium punctatum	M	0	J	J	48.5	34.5	410.69	1.68574	2.61351	11.67	2.66	2.84156	0.64769
2015-11-04	1511	Hutan Melintang	HM	WP	041115HM5	Chiloscyllium punctatum	M	0	J	J	38	27	188.18	1.57978	2.27457	6.14	1.32	3.26283	0.701456
2015-11-04	1511	Hutan Melintang	HM	WP	041115HM6	Chiloscyllium punctatum	M	0	S	S	65.5	47	1087.24	1.81624	3.03633	31.86	5.21	2.93036	0.479195
2015-11-04	1511	Hutan Melintang	HM	WP	041115HM7	Chiloscyllium punctatum	M	0	S	S	62	44	812.15	1.79239	2.90964	29.31	5.48	3.60894	0.674752
2015-11-04	1511	Hutan Melintang	HM	WP	041115HM8	Chiloscyllium punctatum	M	1	A	A	73	54	1506.23	1.86332	3.17789	47.29	13.96	3.13963	0.926817
2015-11-04	1511	Hutan Melintang	HM	WP	041115HM9	Chiloscyllium punctatum	M	0	S	S	38	27	192.5	1.57978	2.28443	5.39	1.2	2.8	0.623377
2015-11-04	1511	Hutan Melintang	HM	WP	041115HM10	Chiloscyllium punctatum	F	0	S	S	44	31	325.31	1.64345	2.5123	12.87	4.42	3.95623	1.3587
2015-11-04	1511	Hutan Melintang	HM	WP	041115HM11	Chiloscyllium punctatum	M	0	S	S	58.5	41.5	841.8	1.76716	2.92521	29	5.3	3.445	0.629603
2015-11-04	1511	Hutan Melintang	HM	WP	041115HM12	Chiloscyllium punctatum	M	0	S	S	60	43.5	785.91	1.77815	2.89537	26.84	4.44	3.41515	0.56495
2015-11-04	1511	Hutan Melintang	HM	WP	041115HM13	Chiloscyllium punctatum	F	0	J	J	45.5	32.5	357.77	1.65801	2.5536	11.64	2.57	3.25349	0.718339
2015-11-04	1511	Hutan Melintang	HM	WP	041115HM14	Chiloscyllium punctatum	F	0	J	J	36.5	26	215.11	1.56229	2.33266	7.16	2.89	3.32853	1.3435
2015-11-04	1511	Hutan Melintang	HM	WP	041115HM15	Chiloscyllium punctatum	M	0	J	J	32	23	131.38	1.50515	2.11853	3.6	1.1	2.74014	0.837266
2015-11-04	1511	Hutan Melintang	HM	WP	041115HM16	Chiloscyllium punctatum	F	0	S	S	55	39.5	716.55	1.74036	2.85525	17.08	4.04	2.38364	0.563813
2015-11-04	1511	Hutan Melintang	HM	WP	041115HM17	Chiloscyllium punctatum	F	1	A	A	64.5	47	1227.77	1.80956	3.08912	55.21	9.8	4.49677	0.798195
2015-11-04	1511	Hutan Melintang	HM	WP	041115HM18	Chiloscyllium punctatum	M	0	J	J	53	38	596.26	1.72428	2.77544	22.4	5.11	3.75675	0.857009
2015-11-04	1511	Hutan Melintang	HM	WP	041115HM19	Chiloscyllium punctatum	F	0	S	S	48	34	430.73	1.68124	2.63421	11.08	5.65	2.57238	1.31173
2015-11-04	1511	Hutan Melintang	HM	WP	041115HM20	Chiloscyllium punctatum	F	0	S	S	55.5	35.5	541.57	1.74429	2.73365	18.64	3.88	3.44185	0.716436
2015-11-04	1511	Hutan Melintang	HM	WP	041115HM21	Chiloscyllium punctatum	M	1	A	A	77	56.5	1876.84	1.88649	3.27343	57.97	17.78	3.0887	0.947337
2015-11-04	1511	Hutan Melintang	HM	WP	041115HM22	Chiloscyllium punctatum	F	0	J	J	37.4	26.5	218.68	1.57287	2.33981	6.58	2.12	3.00896	0.969453
2015-11-04	1511	Hutan Melintang	HM	WP	041115HM23	Chiloscyllium punctatum	M	0	J	J	39	27	252.02	1.59106	2.40144	11.25	1.8	4.46393	0.714229
2015-11-04	1511	Hutan Melintang	HM	WP	041115HM24	Chiloscyllium punctatum	F	0	J	J	47.4	34	473.34	1.67578	2.67517	18.04	3.73	3.81121	0.788017
2015-11-04	1511	Hutan Melintang	HM	WP	041115HM25	Chiloscyllium punctatum	F	0	S	S	42.3	30	266.58	1.62634	2.42583	8.96	1.72	3.36109	0.64521
2015-11-04	1511	Hutan Melintang	HM	WP	041115HM26	Chiloscyllium punctatum	F	1	Ag	A	80.5	59	2441.6	1.9058	3.38767	59.87	93.27	2.45208	3.82004
2015-11-04	1511	Hutan Melintang	HM	WP	041115HM27	Chiloscyllium punctatum	F	1	Ang	A	70.5	51.5	1493.25	1.84819	3.17413	73.54	9.83	4.92483	0.658296
2015-11-04	1511	Hutan Melintang	HM	WP	041115HM28	Chiloscyllium punctatum	F	1	Ang	A	79.5	58.5	1916.57	1.90037	3.28252	84.67	21.21	4.41779	1.10666
2015-11-04	1511	Hutan Melintang	HM	WP	041115HM29	Chiloscyllium punctatum	F	0	S	S	46.5	33	450.06	1.66745	2.65327	18.25	2.66	4.05501	0.591032
2015-11-04	1511	Hutan Melintang	HM	WP	041115HM30	Chiloscyllium punctatum	F	0	J	J	39	27.5	255.83	1.59106	2.40795	6.3		2.46257
2015-11-04	1511	Hutan Melintang	HM	WP	041115HM31	Chiloscyllium punctatum	M	0	J	J	56.6	50.5	688.01	1.75282	2.83759	30.5	4.95	4.43308	0.719466
2015-11-04	1511	Hutan Melintang	HM	WP	041115HM32	Chiloscyllium punctatum	M	0	J	J	51.5	37.5	541.79	1.71181	2.73383	19.84	3.67	3.66194	0.677384
2015-11-04	1511	Hutan Melintang	HM	WP	041115HM33	Chiloscyllium punctatum	M	0	J	J	57.5	40.5	745.22	1.75967	2.87228	24.42	4.18	3.27688	0.560908
2015-11-04	1511	Hutan Melintang	HM	WP	041115HM34	Chiloscyllium punctatum	F	0	J	J	49	36	428.26	1.6902	2.63171	16.29	2.85	3.80376	0.665484
2015-11-04	1511	Hutan Melintang	HM	WP	041115HM35	Chiloscyllium punctatum	F	0	J	J	41	29	241.79	1.61278	2.38344	8.12	2.15	3.35829	0.889201
2015-11-04	1511	Hutan Melintang	HM	WP	041115HM36	Chiloscyllium punctatum	M	0	J	J	42	30.5	271.69	1.62325	2.43407	9.6	2.09	3.53344	0.769259
2015-11-04	1511	Hutan Melintang	HM	WP	041115HM37	Chiloscyllium hasseltii	F	0	S	S	50	36	534.09	1.69897	2.72761	23.2	4.9	4.34384	0.917448
2015-11-04	1511	Hutan Melintang	HM	WP	041115HM38	Chiloscyllium hasseltii	F	1	Ang	A	60	43	1004.76	1.77815	3.00206	58.94	23.37	5.86608	2.32593
2015-11-04	1511	Hutan Melintang	HM	WP	041115HM39	Chiloscyllium hasseltii	M	0	J	J	40	29.5	262.6	1.60206	2.41929	9.2	2.52	3.50343	0.959634
2015-11-04	1511	Hutan Melintang	HM	WP	041115HM40	Chiloscyllium hasseltii	M	0	S	S	65	47.5	1355.76	1.81291	3.13218	59.96	15.62	4.42261	1.15212
2015-11-04	1511	Hutan Melintang	HM	WP	041115HM41	Chiloscyllium hasseltii	M	0	J	J	53	38.5	683.1	1.72428	2.83448	26.58	4	3.89108	0.585566
2015-11-04	1511	Hutan Melintang	HM	WP	041115HM42	Chiloscyllium hasseltii	M	0	J	J	45	32	335.73	1.65321	2.52599	8.9	2.73	2.65094	0.813153
2015-11-04	1511	Hutan Melintang	HM	WP	041115HM43	Chiloscyllium hasseltii	F	0	J	J	46.8	33	336.41	1.67025	2.52687	9.15	3.08	2.7199	0.915549
2015-11-04	1511	Hutan Melintang	HM	WP	041115HM44	Chiloscyllium hasseltii	M	0	J	J	44	32	355.46	1.64345	2.55079	10.39	3.11	2.92297	0.874923
2015-11-04	1511	Hutan Melintang	HM	WP	041115HM45	Chiloscyllium hasseltii	M	1	A	A	67.3	49	1386.29	1.82802	3.14185	86.55	18.05	6.24328	1.30204
2015-11-04	1511	Sungai Besar	Selangor	WP	041115SB1	Scoliodon laticaudus	M	1	A	A	35	26	140.24	1.54407	2.14687	5.1	1.27	3.63662	0.90559
2015-11-04	1511	Sungai Besar	Selangor	WP	041115SB2	Scoliodon laticaudus	M	1	A	A	37.5	28	164.51	1.57403	2.21619	6.98	1.5	4.2429	0.911799
2015-11-04	1511	Sungai Besar	Selangor	WP	041115SB3	Scoliodon laticaudus	M	1	A	A	36	27.5	155.87	1.5563	2.19276	5.77	2.09	3.7018	1.34086
2015-11-04	1511	Sungai Besar	Selangor	WP	041115SB5	Scoliodon laticaudus	M	1	A	A	37	27.7	159.81	1.5682	2.2036	3.97		2.4842
2015-11-04	1511	Sungai Besar	Selangor	WP	041115SB6	Scoliodon laticaudus	M	1	A	A	35.5	27	149.28	1.55023	2.174	5.4	1.11	3.61736	0.743569
2015-11-04	1511	Sungai Besar	Selangor	WP	041115SB7	Scoliodon laticaudus	M	1	A	A	36.4	28	159.56	1.5611	2.20292	7.59	1.9	4.75683	1.19077
2015-11-04	1511	Sungai Besar	Selangor	WP	041115SB8	Scoliodon laticaudus	M	1	A	A	35.3	26.4	145.3	1.54777	2.16227	4.22	1.11	2.90434	0.763937
2015-11-05	1511	Hutan Melintang	HM	WP		Chiloscyllium punctatum	M	0	S	S	68.5	50.5		1.83569
2015-11-05	1511	Hutan Melintang	HM	WP	051115HM4	Chiloscyllium punctatum	M	0	J	J	53	38	515.72	1.72428	2.71241	13.68	3.01	2.6526	0.58365
2015-11-05	1511	Hutan Melintang	HM	WP	051115HM5	Chiloscyllium punctatum	F	0	S	S	56.1	40.4	758.61	1.74896	2.88002	25.97	4.89	3.42337	0.6446
2015-11-05	1511	Hutan Melintang	HM	WP	051115HM6	Chiloscyllium punctatum	M	0	S	S	51.6	36.4	583.54	1.71265	2.76607	20.92	4.5	3.58502	0.771155
2015-11-05	1511	Hutan Melintang	HM	WP	051115HM7	Scoliodon laticaudus	F	1	Ang	A	36	27.1	190.1	1.5563	2.27898	7.14	1.69	3.75592	0.889006
2015-11-05	1511	Hutan Melintang	HM	WP	051115HM8	Scoliodon laticaudus	F	1	Ang	A	39.5	29.5	231.78	1.5966	2.36508	7.54	1.89	3.25308	0.815428
2015-11-05	1511	Hutan Melintang	HM	WP	051115HM9	Scoliodon laticaudus	M	1	A	A	34.7	26	152.92	1.54033	2.18446	5.6	1.62	3.66205	1.05938
2015-11-05	1511	Hutan Melintang	HM	WP	051115HM10	Scoliodon laticaudus	F	1	Ag	A	37	27.8	193.55	1.5682	2.28679	7.53	1.17	3.89047	0.604495
2015-11-05	1511	Hutan Melintang	HM	WP	051115HM11	Chiloscyllium hasseltii	M	0	J	J	56.6	41	767.14	1.75282	2.88487	32.04	5.71	4.17655	0.744323
2015-11-05	1511	Hutan Melintang	HM	WP	051115HM12	Chiloscyllium hasseltii	M	0	J	J	53.2	37.6	639.47	1.72591	2.80582	25.5	3.7	3.98768	0.578604
2015-11-05	1511	Hutan Melintang	HM	WP	051115HM13	Chiloscyllium hasseltii	F	0	S	S	54.7	39.5	714.32	1.73799	2.85389	37.6	6.22	5.26375	0.870758
2015-11-05	1511	Hutan Melintang	HM	WP	051115HM14	Chiloscyllium hasseltii	F	1	Ang	A	60	43.7	970.94	1.77815	2.98719	57.51	8.53	5.92313	0.87853
2015-11-05	1511	Hutan Melintang	HM	WP	051115HM15	Chiloscyllium hasseltii	M	1	A	A	62.6	45.2	1180.06	1.79657	3.0719	53.01	11.27	4.49214	0.955036
2015-11-05	1511	Hutan Melintang	HM	WP	051115HM16	Chiloscyllium hasseltii	M	0	J	J	56.2	42	686.54	1.74974	2.83667	29.38	4.71	4.27943	0.686049
2015-11-05	1511	Hutan Melintang	HM	WP	051115HM17	Chiloscyllium hasseltii	F	0	S	S	52	38	648.59	1.716	2.81197	27.45	5.92	4.23226	0.912749
2015-11-05	1511	Hutan Melintang	HM	WP	051115HM18	Chiloscyllium hasseltii	M	0	J	J	48.5	35	480.03	1.68574	2.68127	20.18	3.82	4.2039	0.795784
2015-11-05	1511	Hutan Melintang	HM	WP	051115HM19	Chiloscyllium hasseltii	M	0	J	J	56	41	719.35	1.74819	2.85694	40.11	3.72	5.57587	0.517134
2015-11-05	1511	Hutan Melintang	HM	WP	051115HM20	Chiloscyllium hasseltii	M	0	J	J	56.5	32.5	403.18	1.75205	2.6055	11.91	2.31	2.95402	0.572945
2015-11-05	1511	Hutan Melintang	HM	WP	051115HM21	Chiloscyllium hasseltii	F	0	S	S	46	33.5	385.18	1.66276	2.58566	15.04	2.46	3.90467	0.638662
2015-11-05	1511	Hutan Melintang	HM	WP	051115HM22	Chiloscyllium hasseltii	F	1	Ang	A	58	42	973.31	1.76343	2.98825	55.8	6.52	5.73301	0.669879
2015-11-05	1511	Hutan Melintang	HM	WP	051115HM23	Chiloscyllium hasseltii	F	0	S	S	52.5	37.5	561.54	1.72016	2.74938	20.04	3.71	3.56876	0.660683
2015-11-05	1511	Hutan Melintang	HM	WP		Chiloscyllium punctatum	M	0	S	S	72	52		1.85733
2015-11-05	1511	Hutan Melintang	HM	WP		Chiloscyllium punctatum	M	0	J	J	48	34		1.68124
2015-11-05	1511	Hutan Melintang	HM	WP		Chiloscyllium punctatum	M	0	J	J	58	40.5		1.76343
2015-11-05	1511	Hutan Melintang	HM	WP		Chiloscyllium punctatum	M	0	J	J	44	31.5		1.64345
2015-11-05	1511	Hutan Melintang	HM	WP	051115HM24	Chiloscyllium punctatum	F	0	J	J	58	40.5	685.33	1.76343	2.8359	20.79	3.2	3.03358	0.466928
2015-11-05	1511	Hutan Melintang	HM	WP	051115HM25	Chiloscyllium punctatum	M	0	J	J	53	37	504.29	1.72428	2.70268	13.9	1.5	2.75635	0.297448
2015-11-05	1511	Hutan Melintang	HM	WP	051115HM26	Chiloscyllium hasseltii	M	0	J	J	42.5	30.5	284.75	1.62839	2.45446	9.3	2.98	3.26602	1.04653
2015-11-05	1511	Pasir Penambang	Selangor	WP	051115PPe1	Chiloscyllium hasseltii	M	0	S	S	62.4	45	1208.06	1.79518	3.08209	59.41	12.44	4.9178	1.02975
2015-11-05	1511	Pasir Penambang	Selangor	WP	051115PPe2	Chiloscyllium hasseltii	M	0	J	J	44.7	32	424.56	1.65031	2.62794	20.51	2.8	4.83088	0.659506
2015-11-05	1511	Pasir Penambang	Selangor	WP	051115PPe3	Chiloscyllium hasseltii	M	0	J	J	43.4	31.5	357.08	1.63749	2.55277	14.45	2.12	4.04671	0.593704
2015-11-05	1511	Pasir Penambang	Selangor	WP	051115PPe4	Scoliodon laticaudus	M	1	A	A	35	27	184.92	1.54407	2.26698	6.03	2.14	3.26087	1.15726
2015-11-05	1511	Pasir Penambang	Selangor	WP	051115PPe5	Scoliodon laticaudus	M	0	S	S	36.5	27.6	168.98	1.56229	2.22784	6.01	1.6	3.55663	0.946858
2015-11-05	1511	Pasir Penambang	Selangor	WP	051115PPe6	Scoliodon laticaudus	M	0	S	S	32	24	133.98	1.50515	2.12704	4.7	1.33	3.50799	0.992685
2015-11-05	1511	Pasir Penambang	Selangor	WP	051115PPe7	Scoliodon laticaudus	M	1	A	A	35.3	27	155.6	1.54777	2.19201	4.21	1.7	2.70566	1.09254
2015-11-05	1511	Pasir Penambang	Selangor	WP	051115PPe8	Scoliodon laticaudus	M	1	A	A	36.5	27.5	180.52	1.56229	2.25653	5.91	1.77	3.27388	0.980501
2015-11-05	1511	Pasir Penambang	Selangor	WP	051115PPe9	Scoliodon laticaudus	F	1	Ag	A	38.2	29	179.18	1.58206	2.25329	4.49	1.55	2.50586	0.865052
2015-11-05	1511	Pasir Penambang	Selangor	WP	051115PPe10	Scoliodon laticaudus	M	0	S	S	32.3	24.5	123.15	1.5092	2.09043	3.06	1.08	2.48477	0.876979
2015-11-05	1511	Pasir Penambang	Selangor	WP	051115PPe11	Scoliodon laticaudus	F	1	Ang	A	28.5	22	93.96	1.45484	1.97294	2.21		2.35206
2015-11-05	1511	Pasir Penambang	Selangor	WP	051115PPe12	Scoliodon laticaudus	F	0	S	S	27.5	20.4	80.62	1.43933	1.90644	3.17		3.93203
2015-11-05	1511	Pasir Penambang	Selangor	WP	051115PPe13	Scoliodon laticaudus	M	1	A	A	33.8	25.5	137.28	1.52892	2.13761	3.3	2.32	2.40385	1.68998
2015-11-05	1511	Pasir Penambang	Selangor	WP	051115PPe14	Scoliodon laticaudus	F	0	J	J	25.4	19	59.48	1.40483	1.77437	1.97	0.18	3.31204	0.302623
2015-11-05	1511	Pasir Penambang	Selangor	WP	051115PPe15	Scoliodon laticaudus	M	1	A	A	30.4	22.6	144.55	1.48287	2.16002	4.44	1.55	3.0716	1.07229
2015-11-05	1511	Pasir Penambang	Selangor	WP	051115PPe16	Scoliodon laticaudus	M	1	A	A	33	25	124.18	1.51851	2.09405	2.69	1.93	2.16621	1.5542
2015-11-05	1511	Pasir Penambang	Selangor	WP	051115PPe17	Scoliodon laticaudus	M	1	A	A	35.2	27	151.8	1.54654	2.18127	5.51	1.98	3.62978	1.30435
2015-11-05	1511	Pasir Penambang	Selangor	WP	051115PPe18	Scoliodon laticaudus	F	0	J	J	26.5	20	72.29	1.42325	1.85908	1.87	0.65	2.5868	0.899156
2015-11-11	1511	Padungan (Kuching)	Sarawak	Borneo		Scoliodon macrorhynchos	M	1	A	A	46.5	34.5		1.66745
2015-12-15	1512	Mukah pasar	Sarawak	Borneo		Chiloscyllium punctatum	M	1	A	A	73			1.86332
2015-12-15	1512	Mukah pasar	Sarawak	Borneo		Chiloscyllium punctatum	M	1	A	A	85			1.92942
2015-12-15	1512	Mukah pasar	Sarawak	Borneo	151215MK1	Scoliodon macrorhynchos	F	0	J	J	23.4	17.8	42.28	1.36922	1.62613	1.29		3.05109
2015-12-15	1512	Mukah pasar	Sarawak	Borneo	151215MK2	Scoliodon macrorhynchos	F	1	Ag	A	39.5	30.4	245.34	1.5966	2.38977	8.67	1.5	3.53387	0.611396
2015-12-15	1512	Mukah pasar	Sarawak	Borneo	151215MK3	Scoliodon macrorhynchos	F	1	Ag	A	35.1	27.2	173.12	1.54531	2.23835	6.19	1.01	3.57555	0.58341
2015-12-15	1512	Mukah pasar	Sarawak	Borneo	151215MK4	Scoliodon macrorhynchos	F	0	J	J	24.7	19	54.12	1.3927	1.73336	1.46		2.69771
2015-12-15	1512	Mukah pasar	Sarawak	Borneo	151215MK5	Scoliodon macrorhynchos	F	1	Ang	A	35.5	27.3	146.8	1.55023	2.16673	3.45		2.35014
2015-12-15	1512	Mukah pasar	Sarawak	Borneo	151215MK6	Scoliodon macrorhynchos	F	1	Ag	A	34.7	26.8	167.74	1.54033	2.22464	5.88	1.08	3.50543	0.643854
2015-12-15	1512	Mukah pasar	Sarawak	Borneo	151215MK7	Scoliodon macrorhynchos	F	1	Ang	A	43	33.3	255.66	1.63347	2.40766	8.32	1.72	3.25432	0.672769
2015-12-15	1512	Mukah pasar	Sarawak	Borneo	151215MK8	Scoliodon macrorhynchos	M	1	A	A	26.4	20.3	68.12	1.4216	1.83327	2.05	0.57	3.0094	0.836759
2015-12-15	1512	Mukah pasar	Sarawak	Borneo	151215MK9	Scoliodon macrorhynchos	M	1	A	A	34.5	26.6	147.7	1.53782	2.16938	3.81	2.3	2.57955	1.55721
2015-12-16	1512	Mukah pasar	Sarawak	Borneo	161215MK2	Scoliodon macrorhynchos	F	1	Ag	A	28	21.5	78.51	1.44716	1.89492	2.31		2.9423
2015-12-16	1512	Mukah pasar	Sarawak	Borneo	161215MK3	Scoliodon macrorhynchos	F	1	Ang	A	27.3	20.7	74.1	1.43616	1.86982	1.94	0.49	2.61808	0.661269
2015-12-16	1512	Mukah pasar	Sarawak	Borneo	161215MK4	Scoliodon macrorhynchos	M	0	S	S	26.7	20.2	62.45	1.42651	1.79553	2.23	0.18	3.57086	0.288231
2015-12-16	1512	Mukah pasar	Sarawak	Borneo	161215MK5	Scoliodon macrorhynchos	M	0	J	J	23.5	18.3	47.44	1.37107	1.67614	1		2.10793
2015-12-16	1512	Mukah pasar	Sarawak	Borneo	161215MK6	Scoliodon macrorhynchos	F	1	Ang	A	31.3	24	95.53	1.49554	1.98014	1.59		1.6644
2015-12-16	1512	Mukah pasar	Sarawak	Borneo	161215MK8	Scoliodon macrorhynchos	F	0	S	S	26	20.4	70.39	1.41497	1.84751	1.56		2.21622
2015-12-16	1512	Mukah pasar	Sarawak	Borneo	161215MK7	Scoliodon macrorhynchos	F	1	Ang	A	24	18.6	46.3	1.38021	1.66558	1.72	0.26	3.7149	0.561555
2015-12-16	1512	Mukah pasar	Sarawak	Borneo	161215MK9	Scoliodon macrorhynchos	F	1	Ang	A	26	20.1	67.31	1.41497	1.82808	1.64		2.43649
2015-12-16	1512	Mukah pasar	Sarawak	Borneo	161215MK11	Scoliodon macrorhynchos	F	1	Ang	A	24	18.4	50.8	1.38021	1.70586	1.55		3.05118
2015-12-16	1512	Mukah pasar	Sarawak	Borneo		Scoliodon macrorhynchos	M	1	A	A	34.5			1.53782
2015-12-16	1512	Mukah pasar	Sarawak	Borneo	161215MK12	Scoliodon macrorhynchos	F	0	S	S	22.3	17.1	39.12	1.3483	1.5924	1.04		2.65849
2015-12-16	1512	Mukah pasar	Sarawak	Borneo	161215MK10	Scoliodon macrorhynchos	F	1	Ang	A	24.4	18.8	49.53	1.38739	1.69487	1.81		3.65435
2015-12-16	1512	Mukah pasar	Sarawak	Borneo		Scoliodon macrorhynchos	M	1	A	A	34			1.53148
2015-12-16	1512	Mukah pasar	Sarawak	Borneo	161215MK14	Scoliodon macrorhynchos	F	0	J	J	21.7	16.7	36.1	1.33646	1.55751	0.82		2.27147
2015-12-16	1512	Mukah pasar	Sarawak	Borneo		Scoliodon macrorhynchos	M	0	S	S	25			1.39794
2015-12-16	1512	Mukah pasar	Sarawak	Borneo		Scoliodon macrorhynchos	M	0	S	S	30			1.47712
2015-12-16	1512	Mukah pasar	Sarawak	Borneo	161215MK13	Scoliodon macrorhynchos	M	0	J	J	22.8	17.5	39.18	1.35793	1.59306	0.82		2.0929
2015-12-16	1512	Mukah pasar	Sarawak	Borneo		Scoliodon macrorhynchos	M	1	A	A	34.5			1.53782
2015-12-16	1512	Mukah pasar	Sarawak	Borneo	161215MK17	Scoliodon macrorhynchos	F	1	Ag	A	45.2	35	399.27	1.65514	2.60127	20.18	1.74	5.05422	0.435795
2015-12-16	1512	Mukah pasar	Sarawak	Borneo	161215MK18	Scoliodon macrorhynchos	F	1	Ag	A	43.2	33.5	308.52	1.63548	2.48928	13.9	1.01	4.50538	0.327369
2015-12-16	1512	Mukah pasar	Sarawak	Borneo	161215MK23	Scoliodon macrorhynchos	F	1	Ag	A	33	25.3	120.97	1.51851	2.08268	4.13	0.41	3.41407	0.338927
2015-12-16	1512	Mukah pasar	Sarawak	Borneo	161215MK16	Scoliodon macrorhynchos	F	1	Ag	A	44.5	33.7	307.77	1.64836	2.48823	12.49		4.05823
2015-12-16	1512	Mukah pasar	Sarawak	Borneo	161215MK22	Scoliodon macrorhynchos	F	1	Ag	A	41.3	31.8	276.2	1.61595	2.44122	11.22		4.06227
2015-12-16	1512	Mukah pasar	Sarawak	Borneo	161215MK20	Scoliodon macrorhynchos	F	1	Ag	A	43	33.8	350.3	1.63347	2.54444	14.66	1.92	4.18498	0.548102
2015-12-16	1512	Mukah pasar	Sarawak	Borneo		Scoliodon macrorhynchos	M	1	A	A	33.5			1.52504
2015-12-16	1512	Mukah pasar	Sarawak	Borneo		Scoliodon macrorhynchos	M	1	A	A	33.5			1.52504
2015-12-16	1512	Mukah pasar	Sarawak	Borneo	161215MK19	Scoliodon macrorhynchos	F	1	Ag	A	44.7	34.8	426.7	1.65031	2.63012	18.73		4.3895
2015-12-16	1512	Mukah pasar	Sarawak	Borneo		Scoliodon macrorhynchos	M	1	A	A	36			1.5563
2015-12-16	1512	Mukah pasar	Sarawak	Borneo	161215MK21	Scoliodon macrorhynchos	F	1	Ag	A	38.7	30	253.42	1.58771	2.40384	8		3.15681
2015-12-17	1512	Mukah landing site	Sarawak	Borneo		Chiloscyllium punctatum	M	1	A	A	68			1.83251
2015-12-17	1512	Mukah landing site	Sarawak	Borneo		Chiloscyllium punctatum	M	1	A	A	73			1.86332
2015-12-17	1512	Mukah landing site	Sarawak	Borneo		Scoliodon macrorhynchos	M	1	A	A	46.5			1.66745
2015-12-17	1512	Mukah landing site	Sarawak	Borneo		Scoliodon macrorhynchos	M	1	A	A	49.5			1.69461
2015-12-17	1512	Mukah pasar	Sarawak	Borneo		Chiloscyllium punctatum	M	1	A	A	67			1.82607
2015-12-17	1512	Mukah pasar	Sarawak	Borneo		Chiloscyllium punctatum	M	0	S	S	70			1.8451
2015-12-18	1512	Mukah landing site	Sarawak	Borneo		Chiloscyllium punctatum	M	1	A	A	84			1.92428
2015-12-18	1512	Mukah landing site	Sarawak	Borneo		Chiloscyllium punctatum	M	1	A	A	74.5			1.87216
2015-12-18	1512	Mukah landing site	Sarawak	Borneo		Chiloscyllium punctatum	M	1	A	A	83			1.91908
2015-12-18	1512	Mukah landing site	Sarawak	Borneo		Chiloscyllium punctatum	M	1	A	A	82			1.91381
2015-12-18	1512	Mukah landing site	Sarawak	Borneo		Chiloscyllium punctatum	M	1	A	A	80			1.90309
2015-12-18	1512	Mukah landing site	Sarawak	Borneo		Chiloscyllium punctatum	M	1	A	A	78			1.89209
2015-12-31	1512	Terengganu LKIM Pulau Kambing	Terengganu	EP		Chiloscyllium hasseltii	M	1	A	A	67	48		1.82607
2016-01-11	1601	Hutan Melintang	HM	WP		Scoliodon laticaudus	M	1	A	A	36.5	28.5		1.56229
2016-01-11	1601	Hutan Melintang	HM	WP		Scoliodon laticaudus	M	1	A	A	36	29		1.5563
2016-01-11	1601	Hutan Melintang	HM	WP	110116HM6	Scoliodon laticaudus	F	1	Ang	A	37.8	29.2	197.44	1.57749	2.29544	6.97	1.19	3.53019	0.602715
2016-01-11	1601	Hutan Melintang	HM	WP	110116HM5	Scoliodon laticaudus	M	1	A	A	39	33.3	241.84	1.59106	2.38353	6.03	4.41	2.49338	1.82352
2016-01-11	1601	Hutan Melintang	HM	WP		Scoliodon laticaudus	F	1	Ag	A	38.5	29.5		1.58546
2016-01-11	1601	Hutan Melintang	HM	WP	110116HM7	Scoliodon laticaudus	F	0	J	J	11.4	9	5.15	1.0569	0.711807	0.44		8.54369
2016-01-11	1601	Hutan Melintang	HM	WP	110116HM8	Chiloscyllium punctatum	F	0	S	S	50.4	35.4	496.83	1.70243	2.69621	16.45	3.89	3.31099	0.782964
2016-01-11	1601	Hutan Melintang	HM	WP	110116HM9	Chiloscyllium punctatum	M	1	A	A	77	54	1761.31	1.88649	3.24584	54.95	20.06	3.11984	1.13893
2016-01-11	1601	Hutan Melintang	HM	WP	110116HM10	Chiloscyllium punctatum	F	0	S	S	47.89	32.5	388.01	1.68024	2.58884	9.93	5.31	2.55921	1.36852
2016-01-11	1601	Hutan Melintang	HM	WP	110116HM11	Chiloscyllium punctatum	F	0	S	S	48.5	33	404.68	1.68574	2.60711	11.02	4.78	2.72314	1.18118
2016-01-11	1601	Hutan Melintang	HM	WP	110116HM12	Chiloscyllium hasseltii	M	0	J	J	47.1	32	401.78	1.67302	2.60399	12.24	2.96	3.04644	0.736722
2016-01-11	1601	Hutan Melintang	HM	WP		Chiloscyllium hasseltii	M	1	A	A	77.5	57		1.8893
2016-01-11	1601	Hutan Melintang	HM	WP	110116HM13	Chiloscyllium punctatum	F	0	S	S	66.4	46.5	1045.71	1.82217	3.01941	26.06	4.58	2.49209	0.43798
2016-01-11	1601	Hutan Melintang	HM	WP	110116HM14	Chiloscyllium hasseltii	F	1	Ag	A	66.2	46.5	1300.99	1.82086	3.11427	33.39	44.19	2.56651	3.39664
2016-01-11	1601	Hutan Melintang	HM	WP	110116HM15	Chiloscyllium hasseltii	F	0	S	S	58.1	38.2	761.68	1.76418	2.88177	47.51	10.67	6.23753	1.40085
2016-01-11	1601	Hutan Melintang	HM	WP	110116HM16	Chiloscyllium hasseltii	M	0	J	J	44	30.2	354.22	1.64345	2.54927	14.03	2.74	3.96082	0.773531
2016-01-11	1601	Hutan Melintang	HM	WP	110116HM17	Chiloscyllium hasseltii	M	0	J	J	46.7	31.5	410	1.66932	2.61278	9.98	2.37	2.43415	0.578049
2016-01-11	1601	Hutan Melintang	HM	WP	110116HM18	Chiloscyllium hasseltii	F	1	Ag	A	64	46	1044.51	1.80618	3.01891	44.01	48.98	4.21346	4.68928
2016-01-11	1601	Hutan Melintang	HM	WP	110116HM19	Chiloscyllium hasseltii	M	0	J	J	49	34.3	442.31	1.6902	2.64573	17.89	3.31	4.04467	0.748344
2016-01-11	1601	Hutan Melintang	HM	WP	110116HM20	Chiloscyllium hasseltii	F	0	S	S	40.8	28.5	247.23	1.61066	2.3931	6.23	2.19	2.51992	0.885815
2016-01-11	1601	Hutan Melintang	HM	WP	110116HM21	Chiloscyllium hasseltii	F	0	S	S	41.7	29	230.17	1.62014	2.36205	5.6	2.36	2.43298	1.02533
2016-01-11	1601	Hutan Melintang	HM	WP	110116HM22	Scoliodon laticaudus	M	1	A	A	34.4	26.5	151.4	1.53656	2.18013	2.92	1.24	1.92867	0.819022
2016-01-11	1601	Hutan Melintang	HM	WP	110116HM23	Scoliodon laticaudus	M	0	S	S	29.6	22.7	90.97	1.47129	1.9589	2.07	0.66	2.27548	0.725514
2016-01-11	1601	Hutan Melintang	HM	WP	110116HM24	Scoliodon laticaudus	M	1	A	A	36	27.9	168.3	1.5563	2.22608	6.22	1.8	3.69578	1.06952
2016-01-11	1601	Hutan Melintang	HM	WP	110116HM25	Scoliodon laticaudus	M	1	A	A	36.2	28	170.98	1.55871	2.23295	6.26	1.98	3.66125	1.15803
2016-01-11	1601	Hutan Melintang	HM	WP	110116HM26	Scoliodon laticaudus	M	1	A	A	30.6	23.6	104.03	1.48572	2.01716	3.38	1.11	3.24906	1.067
2016-01-11	1601	Hutan Melintang	HM	WP	110116HM27	Scoliodon laticaudus	M	1	A	A	31.2	24	117.44	1.49415	2.06982	4.57	1.14	3.89135	0.970708
2016-01-11	1601	Hutan Melintang	HM	WP	110116HM28	Scoliodon laticaudus	M	0	S	S	29.3	22.3	87.83	1.46687	1.94364	2.05	0.97	2.33405	1.10441
2016-01-11	1601	Hutan Melintang	HM	WP	110116HM29	Scoliodon laticaudus	M	0	J	J	29	22.2	82.93	1.4624	1.91871	2.83	0.65	3.41252	0.783794
2016-01-11	1601	Hutan Melintang	HM	WP	110116HM30	Scoliodon laticaudus	M	1	A	A	36	28	168.02	1.5563	2.22536	5.64	1.4	3.35674	0.833234
2016-01-11	1601	Hutan Melintang	HM	WP	110116HM31	Scoliodon laticaudus	M	1	A	A	30.6	23.3	105.15	1.48572	2.02181	3.02	0.85	2.87209	0.808369
2016-01-11	1601	Hutan Melintang	HM	WP	110116HM32	Scoliodon laticaudus	M	1	A	A	32	24.6	116.48	1.50515	2.06625	2.96	1.14	2.54121	0.978709
2016-01-11	1601	Hutan Melintang	HM	WP	110116HM33	Scoliodon laticaudus	M	1	A	A	34.5	26.5	155.79	1.53782	2.19254	6.09	1.83	3.90911	1.17466
2016-01-11	1601	Hutan Melintang	HM	WP	110116HM34	Scoliodon laticaudus	M	1	A	A	31.2	24	98.36	1.49415	1.99282	2.61	1.19	2.65352	1.20984
2016-01-11	1601	Hutan Melintang	HM	WP	110116HM35	Scoliodon laticaudus	M	0	J	J	26.1	20	57.78	1.41664	1.76178	1.36	0.27	2.35376	0.46729
2016-01-11	1601	Hutan Melintang	HM	WP	110116HM36	Scoliodon laticaudus	M	1	A	A	32.7	25.1	122.78	1.51455	2.08913	4.07	1.29	3.31487	1.05066
2016-01-11	1601	Hutan Melintang	HM	WP	110116HM37	Scoliodon laticaudus	M	1	A	A	36.5	28.2	172.8	1.56229	2.23754	4.73	1.61	2.73727	0.931713
2016-01-11	1601	Hutan Melintang	HM	WP	110116HM38	Scoliodon laticaudus	M	0	S	S	28.4	21.7	82.98	1.45332	1.91897	2.44	0.35	2.94047	0.421788
2016-01-11	1601	Hutan Melintang	HM	WP	110116HM39	Scoliodon laticaudus	M	1	A	A	33.6	26.3	141.02	1.52634	2.14928	3.78	2.11	2.68047	1.49624
2016-01-11	1601	Hutan Melintang	HM	WP	110116HM40	Scoliodon laticaudus	M	1	A	A	29.5	22.8	103.79	1.46982	2.01616	3.23	0.96	3.11205	0.924945
2016-01-11	1601	Hutan Melintang	HM	WP	110116HM41	Scoliodon laticaudus	M	1	A	A	34.2	26.5	145.58	1.53403	2.1631	4.63	1.63	3.18038	1.11966
2016-01-11	1601	Hutan Melintang	HM	WP	110116HM42	Scoliodon laticaudus	M	1	A	A	31.7	24.7	117.99	1.50106	2.07185	3.96	1.19	3.35622	1.00856
2016-01-11	1601	Hutan Melintang	HM	WP	110116HM43	Scoliodon laticaudus	F	1	Ag	A	34.8	26.6	149.77	1.54158	2.17542	4.55	0.68	3.03799	0.45403
2016-01-11	1601	Hutan Melintang	HM	WP	110116HM44	Scoliodon laticaudus	F	1	Ang	A	27.7	21.5	78.72	1.44248	1.89609	2.72		3.45528
2016-01-11	1601	Hutan Melintang	HM	WP	110116HM45	Scoliodon laticaudus	F	1	Ang	A	30.2	23	106.13	1.48001	2.02584	2.97		2.79845
2016-01-11	1601	Hutan Melintang	HM	WP	110116HM46	Scoliodon laticaudus	F	1	Ag	A	34.5	26.5	169.41	1.53782	2.22894	4.55		2.68579
2016-01-11	1601	Hutan Melintang	HM	WP	110116HM47	Scoliodon laticaudus	F	1	Ang	A	30.7	23.7	122.93	1.48714	2.08966	4.18	0.74	3.40031	0.601969
2016-01-11	1601	Hutan Melintang	HM	WP	110116HM48	Scoliodon laticaudus	F	1	Ang	A	28.1	21.8	84.94	1.44871	1.92911	2.19	0.42	2.57829	0.494467
2016-01-11	1601	Hutan Melintang	HM	WP	110116HM49	Scoliodon laticaudus	F	1	Ang	A	29.5	22.9	97.15	1.46982	1.98744	3.93		4.04529
2016-01-11	1601	Hutan Melintang	HM	WP	110116HM50	Scoliodon laticaudus	F	1	Ang	A	28.5	22	91.73	1.45484	1.96251	2.61	0.28	2.84531	0.305244
2016-01-11	1601	Hutan Melintang	HM	WP	110116HM51	Scoliodon laticaudus	F	1	Ang	A	27.7	21.4	81.95	1.44248	1.91355	2.81		3.42892
2016-01-11	1601	Sg Besar	Selangor	WP		Chiloscyllium punctatum	M	1	A	A	102	73		2.0086
2016-01-27	1601	Hutan Melintang	HM	WP	270116HM2	Chiloscyllium hasseltii	M	0	S	S	44.8	31.5	337.52	1.65128	2.5283	9.24	2.52	2.73762	0.746622
2016-01-27	1601	Hutan Melintang	HM	WP	270116HM3	Chiloscyllium hasseltii	M	0	S	S	44.7	31.4	335.85	1.65031	2.52615	10.76	3.34	3.20381	0.994492
2016-01-27	1601	Hutan Melintang	HM	WP	270116HM4	Chiloscyllium hasseltii	F	0	S	S	39.8	28.1	236.19	1.59988	2.37326	7.8	2.36	3.30243	0.999196
2016-01-27	1601	Hutan Melintang	HM	WP	270116HM5	Chiloscyllium hasseltii	F	0	S	S	45	32.5	385.85	1.65321	2.58642	11.3	4.13	2.9286	1.07036
2016-01-27	1601	Hutan Melintang	HM	WP	270116HM6	Chiloscyllium hasseltii	F	0	S	S	42.2	29.9	279.65	1.62531	2.44661	10.11	3.8	3.61523	1.35884
2016-01-27	1601	Hutan Melintang	HM	WP	270116HM7	Chiloscyllium hasseltii	F	0	S	S	43.2	30.6	335.02	1.63548	2.52507	16.79	3.09	5.01164	0.922333
2016-01-27	1601	Hutan Melintang	HM	WP	270116HM8	Chiloscyllium punctatum	M	1	A	A	94	65.4	3680.82	1.97313	3.56594	140.73	43.74	3.82333	1.18832
2016-01-27	1601	Hutan Melintang	HM	WP	270116HM9	Chiloscyllium punctatum	F	1	Ang	A	79.2	57.5	2262.24	1.89873	3.35454	157.16	38.92	6.9471	1.72042
2016-01-27	1601	Hutan Melintang	HM	WP	270116HM10	Chiloscyllium punctatum	M	1	A	A	78.8	55.5	2126.95	1.89653	3.32776	96.91	21.71	4.55629	1.02071
2016-01-27	1601	Hutan Melintang	HM	WP		Chiloscyllium punctatum	M	1	A	A	79	57		1.89763
2016-01-27	1601	Hutan Melintang	HM	WP	270116HM11	Chiloscyllium punctatum	F	1	Ang	A	76.7	55.6	2049.44	1.8848	3.31164	41.64	80.37	2.03177	3.92156
2016-01-27	1601	Hutan Melintang	HM	WP	270116HM12	Chiloscyllium punctatum	F	0	S	S	60	42.8	814.27	1.77815	2.91077	36.68	9.38	4.50465	1.15195
2016-01-27	1601	Hutan Melintang	HM	WP	270116HM13	Chiloscyllium punctatum	M	0	S	S	57.2	39.4	629.38	1.7574	2.79891	20.15	6.34	3.20156	1.00734
2016-01-27	1601	Hutan Melintang	HM	WP	270116HM14	Chiloscyllium punctatum	M	0	S	S	54.6	37	609.52	1.73719	2.78499	21.27	5.22	3.48963	0.856412
2016-01-27	1601	Hutan Melintang	HM	WP	270116HM15	Chiloscyllium punctatum	F	0	S	S	48.4	33	437.27	1.68485	2.64075	18.36	3.65	4.19878	0.834725
2016-01-27	1601	Hutan Melintang	HM	WP		Chiloscyllium punctatum	M	0	J	J	60	43		1.77815
2016-01-27	1601	Hutan Melintang	HM	WP		Chiloscyllium punctatum	M	0	J	J	64.5	45		1.80956
2016-01-27	1601	Hutan Melintang	HM	WP	270116HM20	Chiloscyllium hasseltii	F	0	S	S	49.4	35.1	493.63	1.69373	2.6934	17.48	7.55	3.54111	1.52949
2016-01-27	1601	Hutan Melintang	HM	WP	270116HM21	Chiloscyllium hasseltii	M	0	S	S	54.8	38.4	576.44	1.73878	2.76075	13.32	4.33	2.31073	0.751162
2016-01-27	1601	Hutan Melintang	HM	WP	270116HM22	Chiloscyllium punctatum	M	0	S	S	41.5	28.6	265.17	1.61805	2.42352	7.17	2.43	2.70393	0.916393
2016-01-27	1601	Hutan Melintang	HM	WP		Chiloscyllium hasseltii	M	0	J	J	55	40		1.74036
2016-01-27	1601	Hutan Melintang	HM	WP		Chiloscyllium hasseltii	M	0	J	J	48.5	35		1.68574
2016-01-27	1601	Hutan Melintang	HM	WP		Chiloscyllium hasseltii	M	0	J	J	48.5	35		1.68574
2016-01-27	1601	Hutan Melintang	HM	WP		Chiloscyllium hasseltii	M	0	J	J	51.5	37.5		1.71181
2016-01-27	1601	Hutan Melintang	HM	WP		Chiloscyllium hasseltii	M	0	S	S	57	41.5		1.75587
2016-01-27	1601	Sungai Besar	Selangor	WP	270116SB1	Scoliodon laticaudus	F	1	Ag	A	38.5	29.9	272.7	1.58546	2.43569	9.65		3.53869
2016-01-27	1601	Sungai Besar	Selangor	WP	270116SB2	Scoliodon laticaudus	F	1	Ang	A	45.7	35.8	359.89	1.65992	2.55617	10.82		3.00647
2016-01-27	1601	Sungai Besar	Selangor	WP	270116SB3	Scoliodon laticaudus	F	1	Ag	A	39.7	30.9	245.58	1.59879	2.39019	9.82		3.9987
2016-01-27	1601	Sungai Besar	Selangor	WP	270116SB4	Scoliodon laticaudus	F	1	Ag	A	39.1	30.3	265.03	1.59218	2.4233	10.41		3.92786
2016-01-27	1601	Sekincan	Selangor	WP	270116SK1	Scoliodon laticaudus	M	1	A	A	34.9	27	170.36	1.54283	2.23137	6.22	1.37	3.65109	0.804179
2016-01-27	1601	Sekincan	Selangor	WP	270116SK2	Scoliodon laticaudus	M	1	A	A	35.9	27.8	180.17	1.55509	2.25568	5.66	1.61	3.14148	0.8936
2016-01-27	1601	Sekincan	Selangor	WP	270116SK3	Scoliodon laticaudus	M	1	A	A	34.3	26.8	161.73	1.53529	2.20879	4.35	1.01	2.68967	0.624498
2016-01-27	1601	Sekincan	Selangor	WP	270116SK4	Scoliodon laticaudus	M	1	A	A	35.3	27.2	162.65	1.54777	2.21125	4.45	1.94	2.73594	1.19275
2016-01-27	1601	Sekincan	Selangor	WP	270116SK5	Scoliodon laticaudus	M	1	A	A	33.9	26.2	136.64	1.5302	2.13558	3.56	1.48	2.60539	1.08314
2016-01-27	1601	Sekincan	Selangor	WP	270116SK6	Scoliodon laticaudus	M	1	A	A	34.6	26.9	149.3	1.53908	2.17406	4.68	1.07	3.13463	0.716678
2016-01-27	1601	Sekincan	Selangor	WP	270116SK7	Scoliodon laticaudus	F	1	Ag	A	47.8	37.3	418.04	1.67943	2.62122	14.99	3.95	3.58578	0.944886
2016-01-27	1601	Sekincan	Selangor	WP	270116SK8	Scoliodon laticaudus	F	1	Ang	A	36.1	27.7	193.56	1.55751	2.28682	6.33		3.2703
2016-01-27	1601	Sekincan	Selangor	WP	270116SK9	Scoliodon laticaudus	F	1	Ang	A	48.1	37.5	422.39	1.68215	2.62571	15.79	3.08	3.73825	0.729184
2016-01-27	1601	Sekincan	Selangor	WP	270116SK10	Scoliodon laticaudus	F	1	Ang	A	40	30.5	249.94	1.60206	2.39784	10.41	1.93	4.165	0.772185
2016-01-27	1601	Sekincan	Selangor	WP	270116SK11	Scoliodon laticaudus	F	1	Ag	A	49.1	38.2	516.75	1.69108	2.71328	18.21	2.9	3.52395	0.5612
2016-01-27	1601	Sekincan	Selangor	WP	270116SK12	Scoliodon laticaudus	F	1	Ag	A	38.4	29.5	249.22	1.58433	2.39658	10.7		4.2934
2016-01-27	1601	Sekincan	Selangor	WP	270116SK13	Scoliodon laticaudus	F	1	Ag	A	38.6	29.5	255.59	1.58659	2.40754	9.8		3.83427
2016-01-27	1601	Sekincan	Selangor	WP	270116SK14	Scoliodon laticaudus	F	1	Ag	A	42.1	32.4	313.78	1.62428	2.49663	14.97		4.77086
2016-01-27	1601	Sekincan	Selangor	WP	270116SK15	Scoliodon laticaudus	F	1	Ang	A	29.3	22.7	103.02	1.46687	2.01292	3.25		3.15473
2016-03-22	1603	Hutan Melintang	HM	WP	220316HM2	Chiloscyllium punctatum	F	0	S	S	46.9	32.5	325.62	1.67117	2.51271	9.17	3.36	2.81617	1.03188
2016-03-22	1603	Hutan Melintang	HM	WP	220316HM3	Chiloscyllium hasseltii	F	0	S	S	47.5	33.2	467.52	1.67669	2.6698	17.63	4.81	3.77096	1.02883
2016-03-22	1603	Hutan Melintang	HM	WP	220316HM4	Chiloscyllium hasseltii	M	0	S	S	49	34.6	437.52	1.6902	2.641	14.32	4.43	3.27299	1.01253
2016-03-22	1603	Hutan Melintang	HM	WP	220316HM5	Chiloscyllium hasseltii	F	1	Ang	A	54.6	39	750.17	1.73719	2.87516	59.83	8.1	7.97553	1.07976
2016-03-22	1603	Hutan Melintang	HM	WP	220316HM6	Chiloscyllium hasseltii	M	1	A	A	72.5	52.9	1783.21	1.86034	3.2512	76.61	25.55	4.29618	1.43281
2016-03-22	1603	Hutan Melintang	HM	WP	220316HM7	Chiloscyllium punctatum	F	0	S	S	59.9	40.8	812.35	1.77743	2.90974	26.11	7.16	3.21413	0.881393
2016-03-22	1603	Hutan Melintang	HM	WP	220316HM8	Chiloscyllium punctatum	F	0	S	S	47.7	31.5	372.12	1.67852	2.57068	10.3	3.64	2.76792	0.978179
2016-03-22	1603	Hutan Melintang	HM	WP	220316HM9	Chiloscyllium punctatum	M	0	S	S	77.5	52.8	1823.88	1.8893	3.261	83.91	16.97	4.60063	0.930434
2016-03-22	1603	Hutan Melintang	HM	WP	220316HM10	Chiloscyllium punctatum	F	0	S	S	53	36.1	526.62	1.72428	2.7215	18.37	5.52	3.48828	1.04819
2016-03-22	1603	Hutan Melintang	HM	WP	220316HM11	Chiloscyllium punctatum	M	1	A	A	68.5	47.9	1284.16	1.83569	3.10862	50.23	14.47	3.91151	1.12681
2016-03-22	1603	Hutan Melintang	HM	WP	220316HM12	Chiloscyllium punctatum	F	1	Ang	A	66.1	47.5	1336.32	1.8202	3.12591	72.24	24.64	5.40589	1.84387
2016-03-22	1603	Hutan Melintang	HM	WP	220316HM13	Chiloscyllium punctatum	F	0	S	S	64.4	45.7	860.24	1.80889	2.93462	24.31	2.89	2.82596	0.335953
2016-03-22	1603	Hutan Melintang	HM	WP	220316HM14	Chiloscyllium punctatum	F	1	Ag	A	78.4	56.8	1900.32	1.89432	3.27883	89.81	53.15	4.72605	2.7969
2016-03-22	1603	Hutan Melintang	HM	WP	220316HM21	Chiloscyllium punctatum	F	0	S	S	70.5	49	1257.6	1.84819	3.09954	41.8	10.72	3.32379	0.852417
2016-03-22	1603	Hutan Melintang	HM	WP	220316HM22	Chiloscyllium punctatum	M	0	S	S	60	42.9	858.48	1.77815	2.93373	28.15	5.29	3.27905	0.616205
2016-03-22	1603	Hutan Melintang	HM	WP	220316HM23	Chiloscyllium punctatum	F	0	S	S	47.5	33.3	427.32	1.67669	2.63075	16	3.45	3.74427	0.807357
2016-03-22	1603	Hutan Melintang	HM	WP	220316HM24	Chiloscyllium punctatum	F	0	S	S	46	34.8	311.66	1.66276	2.49368	8.89	3.73	2.85247	1.19682
2016-03-22	1603	Hutan Melintang	HM	WP	220316HM25	Chiloscyllium punctatum	F	0	J	J	40.3	29	198.16	1.60531	2.29702	6.93		3.49717
2016-03-22	1603	Hutan Melintang	HM	WP	220316HM26	Chiloscyllium hasseltii	M	0	S	S	57.7	40.2	731.66	1.76118	2.86431	24.35	6.61	3.32805	0.903425
2016-03-22	1603	Hutan Melintang	HM	WP	220316HM27	Chiloscyllium hasseltii	F	0	S	S	50.3	36	507.68	1.70157	2.70559	14.34	3.98	2.82461	0.783958
2016-03-22	1603	Hutan Melintang	HM	WP	220316HM28	Chiloscyllium hasseltii	F	0	S	S	47.2	32.5	352.71	1.67394	2.54742	11.79	2.42	3.34269	0.686116
2016-03-22	1603	Hutan Melintang	HM	WP	220316HM29	Chiloscyllium hasseltii	M	0	J	J	47.5	33	413.44	1.67669	2.61641	16.09	3.8	3.89174	0.919118
2016-03-22	1603	Hutan Melintang	HM	WP	220316HM30	Chiloscyllium hasseltii	M	1	A	A	55.6	39.2	782.92	1.74507	2.89372	23.37	9.67	2.98498	1.23512
2016-03-22	1603	Hutan Melintang	HM	WP	220316HM31	Chiloscyllium hasseltii	F	1	Ag	A	56.5	40.7	840.48	1.75205	2.92453	39.88	29.88	4.74491	3.55511
2016-03-22	1603	Hutan Melintang	HM	WP	220316HM32	Chiloscyllium hasseltii	F	1	Ag	A	62.7	44.8	1086.38	1.79727	3.03598	25.18	38.06	2.31779	3.50338
2016-03-22	1603	Hutan Melintang	HM	WP	220316HM33	Chiloscyllium hasseltii	M	1	A	A	62	44.2	984.21	1.79239	2.99309	58.64	11.95	5.95808	1.21417
2016-03-22	1603	Hutan Melintang	HM	WP		Chiloscyllium hasseltii	M	1	A	A	60	44		1.77815
2016-03-22	1603	Hutan Melintang	HM	WP		Chiloscyllium hasseltii	M	1	A	A	60	44		1.77815
2016-03-22	1603	Hutan Melintang	HM	WP		Chiloscyllium punctatum	M	1	A	A	70.5	51		1.84819
2016-03-23	1603	Hutan Melintang	HM	WP	230316HM1	Chiloscyllium hasseltii	M	1	A	A	71.6	52.2	1764.93	1.85491	3.24673	67.23	25.98	3.80922	1.47201
2016-03-23	1603	Hutan Melintang	HM	WP	230316HM6	Chiloscyllium hasseltii	F	1	Ag	A	51.2	37.5	611.76	1.70927	2.78658	18.62	27.41	3.04368	4.48052
2016-03-23	1603	Hutan Melintang	HM	WP	230316HM7	Chiloscyllium hasseltii	M	0	J	J	47.4	32.8	435.25	1.67578	2.63874	16.23	3.84	3.72889	0.882252
2016-03-23	1603	Hutan Melintang	HM	WP	230316HM13	Chiloscyllium hasseltii	M	0	J	J	51.1	36	429.58	1.70842	2.63304	12.36	3.75	2.87723	0.872946
2016-03-23	1603	Hutan Melintang	HM	WP	230316HM11	Chiloscyllium hasseltii	F	1	Ag	A	58.7	42.8	828.86	1.76864	2.91848	19.22	30.53	2.31885	3.68337
2016-03-23	1603	Hutan Melintang	HM	WP	230316HM12	Chiloscyllium hasseltii	M	1	A	A	55.8	40.3	686.12	1.74663	2.8364	17.26	12.44	2.51559	1.81309
2016-03-23	1603	Hutan Melintang	HM	WP	230316HM8	Chiloscyllium hasseltii	M	1	A	A	78	56.5	2141.12	1.89209	3.33064	84.66	31.35	3.95401	1.46419
2016-03-23	1603	Hutan Melintang	HM	WP	230316HM9	Chiloscyllium hasseltii	M	1	A	A	65	46.5	1230.92	1.81291	3.09023	69.58	16.32	5.65268	1.32584
2016-03-23	1603	Hutan Melintang	HM	WP		Chiloscyllium hasseltii	F	1	Ag	A	60	44		1.77815
2016-03-23	1603	Hutan Melintang	HM	WP		Chiloscyllium hasseltii	M	1	A	A	68.5	50		1.83569
2016-03-23	1603	Hutan Melintang	HM	WP		Chiloscyllium hasseltii	F	1	Ag	A	62	46		1.79239
2016-03-23	1603	Hutan Melintang	HM	WP	230316HM10	Chiloscyllium hasseltii	F	1	Ag	A	65.3	47.8	1070.11	1.81491	3.02943	31.13	38.44	2.90905	3.59215
2016-03-23	1603	Hutan Melintang	HM	WP		Chiloscyllium punctatum	M	0	J	J	71	50.5		1.85126
2016-03-23	1603	Hutan Melintang	HM	WP		Chiloscyllium punctatum	M	1	A	A	88	63		1.94448
2016-03-23	1603	Hutan Melintang	HM	WP	230316HM14	Chiloscyllium punctatum	M	1	A	A	93.3	67.4	3527.85	1.96988	3.54751	98.96	41.39	2.80511	1.17324
2016-03-23	1603	Hutan Melintang	HM	WP	230316HM15	Chiloscyllium punctatum	M	1	A	A	81.9	58.3	2311.63	1.91328	3.36392	71.18	26.39	3.07921	1.14162
2016-03-23	1603	Hutan Melintang	HM	WP	230316HM16	Chiloscyllium punctatum	F	1	Ag	A	68.7	49	1239.34	1.83696	3.09319	23.56	37.66	1.90101	3.03871
2016-03-23	1603	Hutan Melintang	HM	WP	230316HM17	Chiloscyllium punctatum	F	0	S	S	65.7	47.4	1040.79	1.81757	3.01736	33.77	5.71	3.24465	0.548622
2016-03-23	1603	Pasir Penambang	Selangor	WP	230316PPe1	Chiloscyllium hasseltii	F	0	J	J	38.5	27.2	223.9	1.58546	2.35005	10.12	1.93	4.51987	0.861992
2016-03-23	1603	Pasir Penambang	Selangor	WP	230316PPe2	Scoliodon laticaudus	M	0	S	S	24.6	29.4	47.71	1.39094	1.67861	0.93	0.25	1.94928	0.523999
2016-03-23	1603	Pasir Penambang	Selangor	WP	230316PPe3	Scoliodon laticaudus	M	1	A	A	30.1	23.3	22.22	1.47857	1.34674	1.78	0.38	8.0108	1.71017
2016-03-23	1603	Pasir Penambang	Selangor	WP	230316PPe4	Scoliodon laticaudus	M	1	A	A	28.5	21.8	75.05	1.45484	1.87535	1.9	0.58	2.53165	0.772818
2016-03-23	1603	Pasir Penambang	Selangor	WP	230316PPe5	Scoliodon laticaudus	M	0	S	S	29	22.2	87.11	1.4624	1.94007	2.67	0.6	3.06509	0.688784
2016-03-23	1603	Pasir Penambang	Selangor	WP	230316PPe6	Scoliodon laticaudus	M	1	A	A	28.4	21.7	81.62	1.45332	1.9118	2.78	0.86	3.40603	1.05366
2016-03-23	1603	Pasir Penambang	Selangor	WP	230316PPe7	Scoliodon laticaudus	F	1	Ang	A	28.9	22.4	77.41	1.4609	1.8888	2.17		2.80326
2016-03-23	1603	Pasir Penambang	Selangor	WP	230316PPe8	Scoliodon laticaudus	M	1	A	A	28.6	21.7	80.55	1.45637	1.90607	1.36	0.75	1.68839	0.931099
2016-03-23	1603	Pasir Penambang	Selangor	WP	230316PPe9	Scoliodon laticaudus	M	0	J	J	22.9	18.4	44.55	1.35984	1.64885	1.35	0.09	3.0303	0.20202
2016-03-23	1603	Pasir Penambang	Selangor	WP	230316PPe10	Scoliodon laticaudus	M	0	J	J	26.3	20.4	59.91	1.41996	1.7775	1.66		2.77082
2016-03-23	1603	Pasir Penambang	Selangor	WP	230316PPe11	Scoliodon laticaudus	M	0	S	S	27	20.8	62.89	1.43136	1.79858	1.67	0.39	2.65543	0.62013
2016-03-23	1603	Pasir Penambang	Selangor	WP	230316PPe12	Scoliodon laticaudus	M	0	S	S	27.2	21	60.48	1.43457	1.78161	1.53	0.4	2.52976	0.661376
2016-03-23	1603	Pasir Penambang	Selangor	WP	230316PPe13	Scoliodon laticaudus	F	0	S	S	26.5	20.5	69.33	1.42325	1.84092	1.63		2.35107
2016-03-23	1603	Pasir Penambang	Selangor	WP	230316PPe17	Scoliodon laticaudus	M	1	A	A	30.3	23.3	84.95	1.48144	1.92916	1.19		1.40082
2016-04-03	1604	Mukah pasar	Sarawak	Borneo		Chiloscyllium punctatum	M	1	A	A	88	62		1.94448
2016-04-03	1604	Mukah pasar	Sarawak	Borneo		Scoliodon macrorhynchos	M	1	A	A	34.5	26.5		1.53782
2016-04-03	1604	Mukah pasar	Sarawak	Borneo		Scoliodon macrorhynchos	M	1	A	A	39	30		1.59106
2016-04-03	1604	Mukah pasar	Sarawak	Borneo		Scoliodon macrorhynchos	M	1	A	A	35.5	27.5		1.55023
2016-04-03	1604	Mukah pasar	Sarawak	Borneo		Scoliodon macrorhynchos	M	1	A	A	38	29		1.57978
2016-04-03	1604	Mukah pasar	Sarawak	Borneo		Scoliodon macrorhynchos	M	1	A	A	38	29.5		1.57978
2016-04-03	1604	Mukah pasar	Sarawak	Borneo		Scoliodon macrorhynchos	M	1	A	A	39	30.5		1.59106
2016-04-03	1604	Mukah pasar	Sarawak	Borneo		Scoliodon macrorhynchos	M	1	A	A	38	29.5		1.57978
2016-04-03	1604	Mukah pasar	Sarawak	Borneo		Scoliodon macrorhynchos	M	1	A	A	36.5	28		1.56229
2016-04-03	1604	Mukah pasar	Sarawak	Borneo	030416MK14	Scoliodon macrorhynchos	F	1	Ag	A	41.6	32.2	263.42	1.61909	2.42065	13.09		4.96925
2016-04-03	1604	Mukah pasar	Sarawak	Borneo	030416MK15	Scoliodon macrorhynchos	F	1	Ag	A	43.7	33.2	327.67	1.64048	2.51544	11.92	1.15	3.63781	0.350963
2016-04-03	1604	Mukah pasar	Sarawak	Borneo	030416MK16	Scoliodon macrorhynchos	M	1	A	A	35.8	28.2	156.78	1.55388	2.19529	3.73	1.97	2.37913	1.25654
2016-04-03	1604	Mukah pasar	Sarawak	Borneo	030416MK17	Scoliodon macrorhynchos	M	1	A	A	32.3	24.8	124.52	1.5092	2.09524	5.42	0.67	4.35271	0.538066
2016-04-03	1604	Mukah pasar	Sarawak	Borneo	030416MK18	Scoliodon macrorhynchos	M	1	A	A	35.8	27.6	169.55	1.55388	2.2293	6.68	1.39	3.93984	0.819817
2016-04-03	1604	Mukah pasar	Sarawak	Borneo	030416MK19	Scoliodon macrorhynchos	F	1	Ap	A	47	36.7	332.33	1.6721	2.52157	8.53	2.67	2.56673	0.803418
2016-04-03	1604	Mukah pasar	Sarawak	Borneo	030416MK1	Scoliodon macrorhynchos	M	1	A	A	33.8	26.2	144.02	1.52892	2.15842	4.01	1.62	2.78434	1.12484
2016-04-03	1604	Mukah pasar	Sarawak	Borneo	030416MK2	Scoliodon macrorhynchos	M	1	A	A	31.1	24	117.1	1.49276	2.06856	3.21	1.04	2.74125	0.88813
2016-04-03	1604	Mukah pasar	Sarawak	Borneo	030416MK3	Scoliodon macrorhynchos	F	1	Ang	A	36.3	27.8	183.8	1.55991	2.26435	5.81		3.16104
2016-04-03	1604	Mukah pasar	Sarawak	Borneo	030416MK4	Scoliodon macrorhynchos	M	0	S	S	26.5	20.6	61.35	1.42325	1.78781	2.04	0.63	3.32518	1.02689
2016-04-03	1604	Mukah pasar	Sarawak	Borneo	030416MK5	Scoliodon macrorhynchos	M	0	S	S	31.5	24.1	129.46	1.49831	2.11214	3.79	0.68	2.92755	0.525259
2016-04-03	1604	Mukah pasar	Sarawak	Borneo	030416MK6	Scoliodon macrorhynchos	M	0	S	S	29.8	22.9	93.83	1.47422	1.97234	3.03	0.58	3.22924	0.618139
2016-04-03	1604	Mukah pasar	Sarawak	Borneo	030416MK7	Scoliodon macrorhynchos	F	1	Ang	A	41.1	31.9	282.38	1.61384	2.45083	9.47	1.57	3.35364	0.555988
2016-04-03	1604	Mukah pasar	Sarawak	Borneo	030416MK8	Scoliodon macrorhynchos	M	0	J	J	25.5	19.6	59.93	1.40654	1.77764	2.72		4.53863
2016-04-03	1604	Mukah pasar	Sarawak	Borneo	030416MK9	Scoliodon macrorhynchos	F	0	J	J	26.2	20.2	73.77	1.4183	1.86788	1.26		1.70801
2016-04-03	1604	Mukah pasar	Sarawak	Borneo	030416MK10	Scoliodon macrorhynchos	M	0	J	J	22.7	17.6	43.54	1.35603	1.63889	1.1	0.22	2.52641	0.505282
2016-04-03	1604	Mukah pasar	Sarawak	Borneo	030416MK11	Scoliodon macrorhynchos	M	1	A	A	30.5	23.3	99.67	1.4843	1.99856	2.35	1.23	2.35778	1.23407
2016-04-03	1604	Mukah pasar	Sarawak	Borneo	030416MK12	Scoliodon macrorhynchos	M	1	A	A	31.5	24.2	124.15	1.49831	2.09395	2.64	0.9	2.12646	0.72493
2016-04-03	1604	Mukah pasar	Sarawak	Borneo	030416MK13	Scoliodon macrorhynchos	M	1	A	A	32.8	25.7	131.83	1.51587	2.12001	2.86	1.35	2.16946	1.02405
2016-04-04	1604	Mukah pasar	Sarawak	Borneo		Scoliodon macrorhynchos	M	1	A	A	33.5	26.5		1.52504
2016-04-04	1604	Mukah pasar	Sarawak	Borneo		Scoliodon macrorhynchos	M	1	A	A	35	27.5		1.54407
2016-04-04	1604	Mukah pasar	Sarawak	Borneo		Scoliodon macrorhynchos	M	1	A	A	36	28		1.5563
2016-04-04	1604	Mukah pasar	Sarawak	Borneo		Scoliodon macrorhynchos	M	1	A	A	38	29.5		1.57978
2016-04-04	1604	Mukah pasar	Sarawak	Borneo		Scoliodon macrorhynchos	M	1	A	A	32.5	25.5		1.51188
2016-04-04	1604	Mukah pasar	Sarawak	Borneo		Scoliodon macrorhynchos	M	1	A	A	40	31		1.60206
2016-04-04	1604	Mukah pasar	Sarawak	Borneo		Chiloscyllium punctatum	M	1	A	A	85	62	2300	1.92942	3.36173
2016-04-04	1604	Mukah pasar	Sarawak	Borneo	040416MK1	Scoliodon macrorhynchos	M	1	A	A	35.5	27.5	171.74	1.55023	2.23487	4.32	2.09	2.51543	1.21696
2016-04-04	1604	Mukah pasar	Sarawak	Borneo	040416MK2	Scoliodon macrorhynchos	M	1	A	A	31.5	24.5	112.94	1.49831	2.05285	4.05	1.21	3.58597	1.07137
2016-04-04	1604	Mukah pasar	Sarawak	Borneo	040416MK3	Scoliodon macrorhynchos	F	1	Ang	A	35	27	163.73	1.54407	2.21413	6.26		3.82337
2016-04-04	1604	Mukah pasar	Sarawak	Borneo	040416MK4	Scoliodon macrorhynchos	F	1	Ang	A	32	24.5	128.28	1.50515	2.10816	3.45		2.68943
2016-04-04	1604	Mukah pasar	Sarawak	Borneo	040416MK5	Scoliodon macrorhynchos	F	1	Ang	A	37	28.5	183.19	1.5682	2.2629	6.5	1.16	3.54823	0.633222
2016-04-04	1604	Mukah pasar	Sarawak	Borneo	040416MK6	Scoliodon macrorhynchos	F	1	Ag	A	37	28.5	192.25	1.5682	2.28387	6.13	0.62	3.18856	0.322497
2016-04-04	1604	Mukah pasar	Sarawak	Borneo	040416MK7	Scoliodon macrorhynchos	F	1	Ang	A	32.8	25.4	125.65	1.51587	2.09916	3.38		2.69001
2016-04-04	1604	Mukah pasar	Sarawak	Borneo	040416MK8	Scoliodon macrorhynchos	F	1	Ang	A	37.2	28.7	153.18	1.57054	2.1852	4.09		2.67006
2016-04-04	1604	Mukah pasar	Sarawak	Borneo	040416MK9	Scoliodon macrorhynchos	M	1	A	A	35.9	27.4	155.21	1.55509	2.19092	5.13	1.82	3.3052	1.1726
2016-04-05	1604	Mukah pasar	Sarawak	Borneo	050416MK1	Chiloscyllium punctatum	F	1	Ag	A	76	55.5	2000	1.88081	3.30103	66.5	59.63	3.325	2.9815
2016-04-05	1604	Mukah pasar	Sarawak	Borneo	050416MK2	Chiloscyllium punctatum	F	1	Ag	A	65.5	47	1200	1.81624	3.07918	45.28	38.17	3.77333	3.18083
2016-04-05	1604	Mukah pasar	Sarawak	Borneo	050416MK3	Chiloscyllium punctatum	M	1	A	A	75.5	54.5	1700	1.87795	3.23045	74.28	15.83	4.36941	0.931176
2016-04-05	1604	Mukah pasar	Sarawak	Borneo	050416MK4	Chiloscyllium punctatum	F	1	Ag	A	68	48	1200	1.83251	3.07918	59.49	42.65	4.9575	3.55417
2016-04-05	1604	Mukah pasar	Sarawak	Borneo	050416MK5	Chiloscyllium punctatum	F	1	Ang	A	70	49.5	1200	1.8451	3.07918	64.76	19.35	5.39667	1.6125
2016-04-05	1604	Mukah pasar	Sarawak	Borneo	050416MK6	Chiloscyllium punctatum	F	1	Ag	A	74.5	54	1600	1.87216	3.20412	45.38	46.28	2.83625	2.8925
2016-04-05	1604	Mukah pasar	Sarawak	Borneo	050416MK7	Chiloscyllium punctatum	M	1	A	A	72.5	51	1300	1.86034	3.11394	45.73	10.05	3.51769	0.773077
2016-04-05	1604	Mukah pasar	Sarawak	Borneo	050416MK8	Chiloscyllium punctatum	M	1	A	A	74	52.5	1400	1.86923	3.14613	45.77	8.37	3.26929	0.597857
2016-04-05	1604	Mukah pasar	Sarawak	Borneo	050416MK9	Chiloscyllium punctatum	F	0	S	S	64	44.5	900	1.80618	2.95424	36.55	1.36	4.06111	0.151111
2016-04-05	1604	Mukah pasar	Sarawak	Borneo	050416MK10	Chiloscyllium hasseltii	F	1	Ag	A	61	43.5	900	1.78533	2.95424	37.65	33.14	4.18333	3.68222
2016-04-05	1604	Mukah pasar	Sarawak	Borneo	050416MK11	Chiloscyllium hasseltii	F	1	Ag	A	64.5	47	1050	1.80956	3.02119	33.9	40.48	3.22857	3.85524
2016-04-05	1604	Mukah pasar	Sarawak	Borneo		Scoliodon macrorhynchos	M	1	A	A	34	26		1.53148
2016-04-05	1604	Mukah pasar	Sarawak	Borneo		Scoliodon macrorhynchos	M	1	A	A	33	25		1.51851
2016-04-05	1604	Mukah pasar	Sarawak	Borneo	050416MK32	Scoliodon macrorhynchos	F	0	S	S	27.3	21	83.5	1.43616	1.92169	3.65		4.37126
2016-04-05	1604	Mukah pasar	Sarawak	Borneo	050416MK33	Scoliodon macrorhynchos	M	0	J	J	26.8	20.7	75.59	1.42813	1.87846	2.41	0.54	3.18825	0.71438
2016-04-05	1604	Mukah pasar	Sarawak	Borneo	050416MK34	Scoliodon macrorhynchos	M	0	S	S	27.3	20.9	85.46	1.43616	1.93176	2.36	0.78	2.76153	0.912708
2016-04-05	1604	Mukah pasar	Sarawak	Borneo	050416MK35	Scoliodon macrorhynchos	M	0	J	J	28	21.2	105.01	1.44716	2.02123	2.16	0.61	2.05695	0.580897
2016-04-05	1604	Mukah pasar	Sarawak	Borneo	050416MK36	Scoliodon macrorhynchos	F	1	Ang	A	31.6	23.9	122.68	1.49969	2.08877	4.01		3.26867
2016-04-05	1604	Mukah pasar	Sarawak	Borneo	050416MK37	Scoliodon macrorhynchos	M	0	S	S	26.2	20	64.79	1.4183	1.81151
2016-04-05	1604	Mukah pasar	Sarawak	Borneo	050416MK39	Scoliodon macrorhynchos	M	0	S	S	24.9	19.3	62.83	1.3962	1.79817
2016-04-05	1604	Mukah pasar	Sarawak	Borneo	050416MK40	Scoliodon macrorhynchos	M	1	A	A	29.8	22.8	86.31	1.47422	1.93606
2016-04-05	1604	Mukah pasar	Sarawak	Borneo	050416MK41	Scoliodon macrorhynchos	F	1	Ag	A	41.5	32	299.74	1.61805	2.47674	14.57		4.86088
2016-04-05	1604	Mukah pasar	Sarawak	Borneo		Scoliodon macrorhynchos	M	1	A	A	32	24		1.50515
2016-04-05	1604	Mukah pasar	Sarawak	Borneo		Scoliodon macrorhynchos	M	0	S	S	32	24		1.50515
2016-04-05	1604	Mukah pasar	Sarawak	Borneo		Scoliodon macrorhynchos	M	1	A	A	35	27		1.54407
2016-04-05	1604	Mukah pasar	Sarawak	Borneo		Scoliodon macrorhynchos	M	1	A	A	36	28		1.5563
2016-04-05	1604	Mukah pasar	Sarawak	Borneo		Scoliodon macrorhynchos	M	0	S	S	30.5	23.5		1.4843
2016-04-05	1604	Mukah pasar	Sarawak	Borneo		Scoliodon macrorhynchos	M	1	A	A	34.5	26.5		1.53782
2016-04-05	1604	Mukah pasar	Sarawak	Borneo		Scoliodon macrorhynchos	M	1	A	A	38	29.5		1.57978
2016-04-05	1604	Mukah pasar	Sarawak	Borneo		Scoliodon macrorhynchos	M	1	A	A	36	27.5		1.5563
2016-04-06	1604	Mukah pasar	Sarawak	Borneo	060416MK5	Scoliodon macrorhynchos	M	1	A	A	37.9	29.1	198.8	1.57864	2.29842	8.69		4.37123
2016-04-06	1604	Mukah pasar	Sarawak	Borneo	060416MK6	Scoliodon macrorhynchos	F	1	Ang	A	30.6	23.5	98.41	1.48572	1.99304	2.86		2.90621
2016-04-06	1604	Mukah pasar	Sarawak	Borneo	060416MK7	Scoliodon macrorhynchos	F	1	Ang	A	28.5	21.7	89.64	1.45484	1.9525	2.41		2.68853
2016-04-06	1604	Mukah pasar	Sarawak	Borneo	060416MK8	Scoliodon macrorhynchos	F	1	Ang	A	30	23.2	101.42	1.47712	2.00612	3.18		3.13548
2016-04-06	1604	Mukah pasar	Sarawak	Borneo	060416MK9	Scoliodon macrorhynchos	M	1	A	A	36.4	27.9	169.68	1.5611	2.22963	7.99	1.26	4.70886	0.742574
2016-04-06	1604	Mukah pasar	Sarawak	Borneo	060416MK10	Scoliodon macrorhynchos	F	1	Ang	A	34.4	26.3	144.07	1.53656	2.15857	4.7		3.2623
2016-04-06	1604	Mukah pasar	Sarawak	Borneo	060416MK1	Scoliodon macrorhynchos	F	1	Ag	A	35.2	27	186.86	1.54654	2.27152	5.35		2.86311
2016-04-06	1604	Mukah pasar	Sarawak	Borneo	060416MK2	Scoliodon macrorhynchos	F	1	Ag	A	39.4	30.8	298.83	1.5955	2.47542	14.41		4.82214
2016-04-06	1604	Mukah pasar	Sarawak	Borneo	060416MK3	Scoliodon macrorhynchos	F	1	Ag	A	40.9	31.6	315.48	1.61172	2.49897	12.53		3.97173
2016-04-06	1604	Mukah pasar	Sarawak	Borneo	060416MK4	Scoliodon macrorhynchos	F	1	Ag	A	38.8	30.1	284.37	1.58883	2.45388	14.98		5.26778
2016-04-06	1604	Mukah pasar	Sarawak	Borneo	060416MK18	Scoliodon macrorhynchos	F	0	S	S	23.4	18.1	49.88	1.36922	1.69793	1.81		3.62871
2016-04-06	1604	Mukah pasar	Sarawak	Borneo	060416MK19	Scoliodon macrorhynchos	F	0	S	S	26.8	20.4	77.29	1.42813	1.88812	3.07		3.97205
2016-04-06	1604	Mukah pasar	Sarawak	Borneo	060416MK20	Scoliodon macrorhynchos	F	0	J	J	22.4	17	35.61	1.35025	1.55157	1.04		2.92053
2016-04-06	1604	Mukah pasar	Sarawak	Borneo	060416MK21	Scoliodon macrorhynchos	M	0	S	S	26.8	20.6	71.93	1.42813	1.85691	2.39	0.78	3.32267	1.08439
2016-04-06	1604	Mukah pasar	Sarawak	Borneo	060416MK22	Scoliodon macrorhynchos	M	1	A	A	31.2	23.9	103.39	1.49415	2.01448	2.87	0.51	2.7759	0.493278
2016-04-06	1604	Mukah pasar	Sarawak	Borneo	060416MK23	Scoliodon macrorhynchos	F	1	Ang	A	27.4	20.8	89.99	1.43775	1.95419	2.96		3.28925
2016-04-06	1604	Mukah pasar	Sarawak	Borneo	060416MK24	Scoliodon macrorhynchos	F	0	J	J	20.9	16.2	28.11	1.32015	1.44886	0.76		2.70366
NA	1604	Mukah DOF	Sarawak	Borneo	MK3	Chiloscyllium punctatum	M	0	S	S	61.5	44		1.78888
2016-04-07	1604	Mukah pasar	Sarawak	Borneo		Scoliodon macrorhynchos	M	1	A	A	32.5	24.5		1.51188
2016-04-07	1604	Mukah pasar	Sarawak	Borneo		Scoliodon macrorhynchos	M	1	A	A	31	24		1.49136
2016-04-07	1604	Mukah pasar	Sarawak	Borneo		Scoliodon macrorhynchos	M	1	A	A	34	25.5		1.53148
2016-04-07	1604	Mukah pasar	Sarawak	Borneo		Scoliodon macrorhynchos	M	0	S	S	31	23.5		1.49136
2016-04-07	1604	Mukah pasar	Sarawak	Borneo		Scoliodon macrorhynchos	M	0	S	S	29	22		1.4624
2016-04-07	1604	Mukah pasar	Sarawak	Borneo		Scoliodon macrorhynchos	M	1	A	A	32.5	26		1.51188
2016-04-07	1604	Mukah pasar	Sarawak	Borneo		Scoliodon macrorhynchos	M	1	A	A	37	28		1.5682
2016-04-07	1604	Mukah pasar	Sarawak	Borneo		Scoliodon macrorhynchos	M	1	A	A	31	23.5		1.49136
2016-04-07	1604	Mukah pasar	Sarawak	Borneo		Scoliodon macrorhynchos	M	1	A	A	36.5	28		1.56229
2016-04-27	1604	Hutan Melintang	HM	WP	270416HM2	Chiloscyllium punctatum	M	0	J	J	47	33	286.45	1.6721	2.45705	9.25	3.37	3.22918	1.17647
2016-04-27	1604	Hutan Melintang	HM	WP	270416HM3	Chiloscyllium hasseltii	F	1	Ag	A	67.5	49	1165.87	1.8293	3.06665	25.4	42.15	2.17863	3.61533
2016-04-27	1604	Hutan Melintang	HM	WP	270416HM4	Chiloscyllium punctatum	F	1	Ang	A	87	63.5		1.93952		84.66	20.35	#DIV/0!	#DIV/0!
2016-04-27	1604	Hutan Melintang	HM	WP	270416HM5	Chiloscyllium punctatum	F	0	S	S	61.5	44	813.47	1.78888	2.91034	19.95	4.22	2.45246	0.518765
2016-04-27	1604	Hutan Melintang	HM	WP	270416HM6	Chiloscyllium punctatum	F	0	J	J	45	32	295.22	1.65321	2.47015	7.12	0.77	2.41176	0.260822
2016-04-27	1604	Hutan Melintang	HM	WP	270416HM7	Chiloscyllium punctatum	F	0	S	S	44.5	31	270.54	1.64836	2.43223	8.23	1.95	3.04206	0.720781
2016-04-27	1604	Hutan Melintang	HM	WP	270416HM8	Chiloscyllium punctatum	F	0	S	S	56	38.5	639.82	1.74819	2.80606	20.54	4.62	3.21028	0.722078
2016-04-28	1604	Hutan Melintang	HM	WP		Chiloscyllium hasseltii	M	0	J	J	51	36		1.70757
2016-04-28	1604	Hutan Melintang	HM	WP		Chiloscyllium hasseltii	M	0	J	J	45.5	32.5		1.65801
2016-04-28	1604	Hutan Melintang	HM	WP		Chiloscyllium hasseltii	M	0	S	S	61	43		1.78533
2016-04-28	1604	Hutan Melintang	HM	WP		Chiloscyllium hasseltii	M	0	J	J	48	34		1.68124
2016-04-28	1604	Hutan Melintang	HM	WP		Chiloscyllium hasseltii	M	0	S	S	60.5	43		1.78176
2016-04-28	1604	Hutan Melintang	HM	WP		Chiloscyllium hasseltii	M	1	A	A	74	55		1.86923
2016-04-28	1604	Hutan Melintang	HM	WP	280416HM13	Chiloscyllium punctatum	M	1	A	A	86.8	62.1	2697.13	1.93852	3.4309	84.73	19.49	3.14149	0.72262
2016-04-28	1604	Hutan Melintang	HM	WP	280416HM14	Chiloscyllium punctatum	M	0	J	J	41	32.8	402.54	1.61278	2.60481	11.45	3.1	2.84444	0.77011
2016-04-28	1604	Hutan Melintang	HM	WP	280416HM15	Chiloscyllium punctatum	M	0	J	J	42.7	29.6	287.97	1.63043	2.45935	7.53	1.6	2.61486	0.555613
2016-04-28	1604	Hutan Melintang	HM	WP	280416HM16	Chiloscyllium hasseltii	F	1	Ag	A	62.8	45.2	1312.2	1.79796	3.118	35.15	58.75	2.67871	4.47721
2016-04-28	1604	Hutan Melintang	HM	WP	280416HM17	Chiloscyllium hasseltii	M	1	A	A	65.5	46.9	1449.48	1.81624	3.16121	54.62	16.76	3.76825	1.15628
2016-04-28	1604	Hutan Melintang	HM	WP	280416HM18	Chiloscyllium hasseltii	F	0	S	S	60.4	42	920.98	1.78104	2.96425	44.31	6.74	4.81118	0.731829
2016-04-28	1604	Hutan Melintang	HM	WP	280416HM19	Chiloscyllium hasseltii	F	1	Ang	A	55.4	39.6	787.45	1.74351	2.89622	50.64	8.18	6.43088	1.0388
2016-04-28	1604	Hutan Melintang	HM	WP	280416HM20	Chiloscyllium hasseltii	F	0	S	S	42.6	30	292.63	1.62941	2.46632	6.92	2.82	2.36476	0.963674
2016-04-28	1604	Hutan Melintang	HM	WP	280416HM21	Chiloscyllium hasseltii	M	0	J	J	40.9	28.2	242.25	1.61172	2.38426	6.13	2.22	2.53044	0.916409
2016-04-28	1604	Hutan Melintang	HM	WP	280416HM22	Chiloscyllium hasseltii	F	0	S	S	41.9	29.1	267.62	1.62221	2.42752	8.63	2.78	3.22472	1.03879
2016-04-28	1604	Hutan Melintang	HM	WP	280416HM23	Chiloscyllium hasseltii	M	0	J	J	43.1	30.2	301.36	1.63448	2.47909	9.54	2.47	3.16565	0.819618
2016-04-28	1604	Hutan Melintang	HM	WP	280416HM24	Chiloscyllium hasseltii	F	0	S	S	37.8	26.6	199.86	1.57749	2.30073	7.28	1.95	3.64255	0.975683
2016-04-28	1604	Hutan Melintang	HM	WP	280416HM1	Chiloscyllium punctatum	F	1	Ag	A	73.9	55.6	1896.64	1.86864	3.27798	58.24	46.1	3.07069	2.43061
2016-04-28	1604	Hutan Melintang	HM	WP	280416HM2	Chiloscyllium hasseltii	M	1	A	A	69.3	49.3	1412.28	1.84073	3.14992	54.43	22.09	3.85405	1.56414
2016-04-28	1604	Hutan Melintang	HM	WP	280416HM3	Chiloscyllium hasseltii	F	1	Ang	A	67.8	48.9	1245.2	1.83123	3.09524	41.29	50.73	3.31593	4.07404
2016-04-28	1604	Hutan Melintang	HM	WP	280416HM4	Chiloscyllium hasseltii	M	1	A	A	75.5	54.5	1814.39	1.87795	3.25873	45	25.23	2.48017	1.39055
2016-04-28	1604	Hutan Melintang	HM	WP	280416HM5	Chiloscyllium hasseltii	M	1	A	A	67	48.5	1333.78	1.82607	3.12508	53.93	15.66	4.0434	1.17411
2016-04-28	1604	Hutan Melintang	HM	WP	280416HM6	Chiloscyllium hasseltii	M	0	S	S	56.9	39.9	717.27	1.75511	2.85568	20.44	4.61	2.84969	0.642715
2016-04-28	1604	Hutan Melintang	HM	WP	280416HM7	Chiloscyllium hasseltii	M	1	A	A	58.1	41.2	862.69	1.76418	2.93585	15.21	8.83	1.76309	1.02354
2016-04-28	1604	Sungai Besar	Selangor	WP	280416SB1	Scoliodon laticaudus	M	1	A	A	35	27	142.78	1.54407	2.15467	2.57	1.33	1.79997	0.931503
2016-04-28	1604	Sungai Besar	Selangor	WP	280416SB2	Scoliodon laticaudus	F	1	Ang	A	43	33.6	295.74	1.63347	2.47091	12		4.05762
2016-04-28	1604	Sungai Besar	Selangor	WP	280416SB3	Scoliodon laticaudus	F	1	Ang	A	32.5	25	129.02	1.51188	2.11066	3.52		2.72826
2016-04-28	1604	Sungai Besar	Selangor	WP	280416SB4	Scoliodon laticaudus	M	1	A	A	36.9	28.4	196.98	1.56703	2.29442	4.22	2.7	2.14235	1.3707
2016-04-28	1604	Sungai Besar	Selangor	WP	280416SB5	Scoliodon laticaudus	F	1	Ag	A	35.4	27.5	153.3	1.549	2.18554	3.32		2.16569
2016-04-28	1604	Sungai Besar	Selangor	WP	280416SB6	Scoliodon laticaudus	F	1	Ang	A	34.6	27	148.19	1.53908	2.17082	5.4		3.64397
2016-04-28	1604	Sungai Besar	Selangor	WP	280416SB7	Scoliodon laticaudus	F	1	Ang	A	31.3	23.9	105.31	1.49554	2.02247	3.26		3.09562
2016-04-28	1604	Sungai Besar	Selangor	WP	280416SB8	Scoliodon laticaudus	M	1	A	A	34.4	26.4	154.53	1.53656	2.18901	3.65	1.26	2.362	0.815376
2016-04-28	1604	Sungai Besar	Selangor	WP	280416SB9	Scoliodon laticaudus	M	1	A	A	34.7	26.5	160.63	1.54033	2.20583	4.47	1.4	2.78279	0.871568
2016-04-28	1604	Sungai Besar	Selangor	WP	280416SB10	Scoliodon laticaudus	M	1	A	A	32	24.8	124.81	1.50515	2.09625	3.03	1.64	2.42769	1.314
2016-04-28	1604	Pasir Penambang	Selangor	WP	280416PPe1	Scoliodon laticaudus	F	1	Ang	A	48.5	37.5	392.53	1.68574	2.59387	10.32	2.17	2.6291	0.552824
2016-04-28	1604	Pasir Penambang	Selangor	WP	280416PPe2	Scoliodon laticaudus	F	1	Ang	A	48.3	37.2	413.45	1.68395	2.61642	14.2	2.22	3.43451	0.536945
2016-04-28	1604	Pasir Penambang	Selangor	WP	280416PPe3	Scoliodon laticaudus	F	1	Ag	A	49.6	38.9	478.96	1.69548	2.6803	15.34	2.21	3.20277	0.461416
2016-06-24	1606	Hutan Melintang	HM	WP	240616HM1	Chiloscyllium punctatum	M	1	A	A	86.4	62.7	2458.33	1.93651	3.39064	109.88	20.07	4.4697	0.816408
2016-06-24	1606	Hutan Melintang	HM	WP	240616HM2	Chiloscyllium hasseltii	M	1	A	A	74	52.9	1499.07	1.86923	3.17582	36.69	26.17	2.44752	1.74575
2016-06-24	1606	Hutan Melintang	HM	WP	240616HM3	Chiloscyllium hasseltii	F	1	Ag	A	69.1	49	1377.92	1.83948	3.13922	32.76	41.16	2.3775	2.98711
2016-06-24	1606	Hutan Melintang	HM	WP	240616HM4	Chiloscyllium hasseltii	F	1	Ag	A	59.3	42	958.97	1.77305	2.98181	41.6	41.65	4.33799	4.3432
2016-06-24	1606	Hutan Melintang	HM	WP	240616HM5	Chiloscyllium hasseltii	F	1	Ag	A	64	45.1	1084.96	1.80618	3.03541	30.92	47.52	2.84987	4.37988
2016-06-24	1606	Hutan Melintang	HM	WP	240616HM6	Chiloscyllium hasseltii	M	1	A	A	62.6	44.4	903.08	1.79657	2.95573	31.76	8.76	3.51685	0.970014
2016-06-24	1606	Hutan Melintang	HM	WP	240616HM7	Chiloscyllium hasseltii	F	1	Ag	A	73.4	52.3	1468.86	1.8657	3.16698	34.34	71.19	2.33787	4.84662
2016-06-24	1606	Hutan Melintang	HM	WP	240616HM8	Chiloscyllium hasseltii	F	1	Ag	A	71	50.4	1247.85	1.85126	3.09616	34.39	49.62	2.75594	3.97644
2016-06-24	1606	Hutan Melintang	HM	WP	240616HM9	Chiloscyllium hasseltii	F	1	Ang	A	55	39	657.13	1.74036	2.81765	39.1	6.46	5.95012	0.983063
2016-06-24	1606	Hutan Melintang	HM	WP		Chiloscyllium punctatum	M	0	J	J	60	42		1.77815
2016-06-24	1606	Hutan Melintang	HM	WP		Chiloscyllium punctatum	M	0	J	J	45.5	32		1.65801
2016-06-24	1606	Hutan Melintang	HM	WP	240616HM24	Chiloscyllium punctatum	M	1	A	A	89.3	63.2	2749.36	1.95085	3.43923	56.97	19.62	2.07212	0.713621
2016-06-24	1606	Hutan Melintang	HM	WP	240616HM25	Chiloscyllium punctatum	M	1	A	A	94.8	70.5	3633.79	1.97681	3.56036	93.49	26.83	2.5728	0.738348
2016-06-24	1606	Hutan Melintang	HM	WP	240616HM26	Chiloscyllium punctatum	M	0	J	J	58.1	40.3	679.15	1.76418	2.83197	16.81	4.72	2.47515	0.694986
2016-06-24	1606	Hutan Melintang	HM	WP	240616HM27	Chiloscyllium punctatum	M	0	J	J	53.8	37.4	541.58	1.73078	2.73366	14.41	2.62	2.66073	0.48377
2016-06-24	1606	Hutan Melintang	HM	WP	240616HM28	Chiloscyllium hasseltii	M	0	S	S	54.7	38.4	651.02	1.73799	2.81359	15.73	3.93	2.41621	0.603668
2016-06-24	1606	Hutan Melintang	HM	WP	240616HM29	Chiloscyllium hasseltii	M	0	J	J	50	36.3	527.85	1.69897	2.72251	12.42	3.92	2.35294	0.742635
2016-06-24	1606	Hutan Melintang	HM	WP	240616HM30	Chiloscyllium hasseltii	F	0	J	J	48.3	33.8	386.74	1.68395	2.58742	10.3	3.02	2.66329	0.780886
2016-06-24	1606	Pasir Penambang	Selangor	WP	240616PPe1	Scoliodon laticaudus	M	1	A	A	32.5	24.9	132.28	1.51188	2.12149	4.04	2.26	3.05413	1.7085
2016-06-24	1606	Pasir Penambang	Selangor	WP	240616PPe2	Scoliodon laticaudus	F	1	Ap	A	36.9	28.5	138.37	1.56703	2.14104	3.18		2.29819
2016-06-24	1606	Pasir Penambang	Selangor	WP	240616PPe3	Scoliodon laticaudus	M	1	A	A	31.9	24.9	119.93	1.50379	2.07893	3.97	1.06	3.31026	0.883849
2016-06-24	1606	Pasir Penambang	Selangor	WP	240616PPe4	Scoliodon laticaudus	F	1	Ag	A	32.7	25.2	141.35	1.51455	2.1503	4.05	0.98	2.86523	0.693314
2016-06-24	1606	Pasir Penambang	Selangor	WP	240616PPe5	Scoliodon laticaudus	M	1	A	A	30.2	23	107.97	1.48001	2.0333	2.57	0.68	2.38029	0.629805
2016-06-24	1606	Pasir Penambang	Selangor	WP	240616PPe6	Scoliodon laticaudus	M	1	A	A	33.9	26	144.74	1.5302	2.16059	3.59	2.29	2.48031	1.58215
2016-06-24	1606	Pasir Penambang	Selangor	WP	240616PPe7	Scoliodon laticaudus	F	1	Ang	A	33	25.5	140.29	1.51851	2.14703	4.88		3.47851
2016-06-24	1606	Pasir Penambang	Selangor	WP	240616PPe8	Scoliodon laticaudus	M	1	A	A	34.8	26.6	133.26	1.54158	2.1247	3.6	1.12	2.70149	0.840462
2016-06-24	1606	Pasir Penambang	Selangor	WP	240616PPe9	Scoliodon laticaudus	M	1	A	A	32.6	25.2	122.92	1.51322	2.08962	2.65	0.62	2.15587	0.504393
2016-07-27	1607	Hutan Melintang	HM	WP	270716HM1	Scoliodon laticaudus	F	1	Ag	A	46.6	35.7	455.1	1.66839	2.65811	22.59	2.01	4.96374	0.441661
2016-07-27	1607	Hutan Melintang	HM	WP	270716HM2	Scoliodon laticaudus	M	1	A	A	35.5	27.2	166.32	1.55023	2.22094	4.09	1.99	2.45911	1.19649
2016-07-27	1607	Hutan Melintang	HM	WP	270716HM12	Chiloscyllium punctatum	M	1	A	A	81.5	57.9	2524.11	1.91116	3.40211	98.04	22.9	3.88414	0.90725
2016-07-27	1607	Hutan Melintang	HM	WP	270716HM13	Chiloscyllium punctatum	F	1	Ag	A	74.2	53.8	1833.42	1.8704	3.26326	58.61	63.49	3.19676	3.46293
2016-07-27	1607	Hutan Melintang	HM	WP	270716HM14	Chiloscyllium punctatum	F	1	Ag	A	80.1	56.8	2259.36	1.90363	3.35399	63.64	109.31	2.81673	4.8381
2016-07-27	1607	Hutan Melintang	HM	WP	270716HM15	Chiloscyllium punctatum	F	1	Ang	A	69.3	49.8	1522.53	1.84073	3.18257	43.92	64.34	2.88467	4.22586
2016-07-27	1607	Hutan Melintang	HM	WP	270716HM16	Chiloscyllium hasseltii	M	1	A	A	80.6	58.5	2371.19	1.90634	3.37497	76.81	35.14	3.2393	1.48196
2016-07-27	1607	Hutan Melintang	HM	WP		Chiloscyllium hasseltii	M	1	A	A	78	58		1.89209
2016-07-27	1607	Hutan Melintang	HM	WP		Chiloscyllium hasseltii	M	1	A	A	69	51		1.83885
2016-07-28	1607	Hutan Melintang	HM	WP	280716HM52	Chiloscyllium punctatum	M	1	A	A	87	63	2547.93	1.93952	3.40619	84.56	23.01	3.31877	0.903086
2016-07-28	1607	Hutan Melintang	HM	WP	280716HM53	Chiloscyllium punctatum	M	0	J	J	64.7	44.9	1030.3	1.8109	3.01296	33.57	4.6	3.25827	0.446472
2016-07-28	1607	Hutan Melintang	HM	WP	280716HM54	Chiloscyllium punctatum	F	0	J	J	42.2	39.4	238.68	1.62531	2.37782	4.45	1.12	1.86442	0.469248
2016-07-28	1607	Hutan Melintang	HM	WP	280716HM11	Scoliodon laticaudus	F	1	Ag	A	45.2	34.8	375.26	1.65514	2.57433	14.18	2.11	3.77871	0.562277
2016-07-28	1607	Hutan Melintang	HM	WP	280716HM12	Scoliodon laticaudus	F	1	Ang	A	46.5	36	357.16	1.66745	2.55286	11.68	2.06	3.27024	0.576772
2016-07-28	1607	Hutan Melintang	HM	WP	280716HM13	Scoliodon laticaudus	F	1	Ang	A	42.2	33	293.48	1.62531	2.46758	8.96		3.05302
2016-07-28	1607	Hutan Melintang	HM	WP	280716HM14	Scoliodon laticaudus	F	1	Ang	A	35.2	27.2	169.74	1.54654	2.22978	7.97		4.69542
2016-07-28	1607	Hutan Melintang	HM	WP	280716HM15	Scoliodon laticaudus	F	1	Ang	A	37	28.5	182.95	1.5682	2.26233	7.79	1.53	4.25799	0.836294
2016-07-28	1607	Hutan Melintang	HM	WP	280716HM16	Scoliodon laticaudus	F	1	Ag	A	51.3	39.9	563.04	1.71012	2.75054	19.42		3.44913
2016-07-28	1607	Hutan Melintang	HM	WP	280716HM17	Scoliodon laticaudus	F	1	Ang	A	48.4	37.8	492.94	1.68485	2.69279	15.83	3.03	3.21134	0.614679
2016-07-28	1607	Hutan Melintang	HM	WP	280716HM18	Scoliodon laticaudus	F	1	Ag	A	39.7	30.5	259.98	1.59879	2.41494	13.58	2.25	5.22348	0.865451
2016-07-28	1607	Hutan Melintang	HM	WP	280716HM19	Scoliodon laticaudus	F	1	Ag	A	44.5	34.4	393.88	1.64836	2.59536	16.16		4.10277
2016-07-28	1607	Hutan Melintang	HM	WP	280716HM20	Scoliodon laticaudus	F	1	Ag	A	46.3	35.8	399.9	1.66558	2.60195	15.19	2.26	3.79845	0.565141
2016-07-28	1607	Hutan Melintang	HM	WP	280716HM21	Scoliodon laticaudus	F	1	Ang	A	44.8	34.8	336.56	1.65128	2.52706	10.48	1.97	3.11386	0.585334
2016-07-28	1607	Hutan Melintang	HM	WP	280716HM22	Scoliodon laticaudus	F	1	Ang	A	34.9	26.9	140.74	1.54283	2.14842	3.97	0.9	2.8208	0.639477
2016-07-28	1607	Hutan Melintang	HM	WP	280716HM23	Scoliodon laticaudus	F	1	Ag	A	31.3	24.5	125.89	1.49554	2.09999	3.64		2.89141
2016-07-28	1607	Hutan Melintang	HM	WP	280716HM24	Scoliodon laticaudus	M	1	A	A	38.5	30	202.24	1.58546	2.30587	4.66	2.09	2.30419	1.03343
2016-07-28	1607	Hutan Melintang	HM	WP	280716HM25	Scoliodon laticaudus	F	1	Ag	A	31.8	24.4	120.94	1.50243	2.08257	4.17		3.44799
2016-07-28	1607	Hutan Melintang	HM	WP	280716HM26	Scoliodon laticaudus	F	1	Ang	A	33	25.6	141.69	1.51851	2.15134	5.37		3.78996
2016-07-28	1607	Hutan Melintang	HM	WP	280716HM27	Scoliodon laticaudus	F	1	Ag	A	34.4	27	178.94	1.53656	2.25271	5.95		3.32514
2016-07-28	1607	Hutan Melintang	HM	WP	280716HM28	Scoliodon laticaudus	F	0	S	S	27	21	71.83	1.43136	1.85631	2.34		3.25769
2016-07-28	1607	Hutan Melintang	HM	WP	280716HM31	Chiloscyllium hasseltii	M	0	S	S	63.6	45.9	1314.85	1.80346	3.11888	42.78	9.22	3.2536	0.701221
2016-07-28	1607	Hutan Melintang	HM	WP	280716HM32	Chiloscyllium hasseltii	M	0	S	S	59.6	41.9	881.38	1.77525	2.94516	48.88	6.27	5.54585	0.711384
2016-07-28	1607	Hutan Melintang	HM	WP	280716HM33	Chiloscyllium hasseltii	M	0	J	J	45.2	31.5	371.84	1.65514	2.57036	11.36	1.69	3.05508	0.454497
2016-07-28	1607	Hutan Melintang	HM	WP	280716HM34	Chiloscyllium hasseltii	F	0	S	S	54.5	37.5	651.87	1.7364	2.81416	36.62	4.48	5.61768	0.687254
2016-07-28	1607	Hutan Melintang	HM	WP	280716HM35	Chiloscyllium punctatum	M	1	A	A	76.8	54	2044.3	1.88536	3.31054	78.71	14.65	3.85022	0.716627
2016-07-28	1607	Hutan Melintang	HM	WP	280716HM36	Chiloscyllium punctatum	F	0	S	S	54.9	38.2	647.31	1.73957	2.81111	23.85	4.75	3.68448	0.733806
2016-07-28	1607	Hutan Melintang	HM	WP	280716HM37	Chiloscyllium punctatum	M	1	A	A	69.7	49.4	1274.21	1.84323	3.10524	37.98	11.46	2.98067	0.899381
2016-07-28	1607	Hutan Melintang	HM	WP	280716HM38	Chiloscyllium punctatum	F	0	S	S	64	44.4	1055.65	1.80618	3.02352	33.38	6.84	3.16203	0.647942
2016-08-10	1608	Hutan Melintang	HM	WP		Chiloscyllium punctatum	M	0	J	J	57	40		1.75587
2016-08-10	1608	Hutan Melintang	HM	WP		Chiloscyllium punctatum	M	1	A	A	86	63		1.9345
2016-08-10	1608	Hutan Melintang	HM	WP		Chiloscyllium punctatum	M	0	J	J	56	40		1.74819
2016-08-10	1608	Hutan Melintang	HM	WP	100816HM26	Chiloscyllium punctatum	M	1	A	A	79.8	56.8	2204.98	1.902	3.3434	70.56	20.84	3.20003	0.945133
2016-08-10	1608	Hutan Melintang	HM	WP	100816HM27	Chiloscyllium punctatum	M	1	A	A	69.1	48.2	1498.26	1.83948	3.17559	50.69	14.88	3.38326	0.993152
2016-08-10	1608	Hutan Melintang	HM	WP	100816HM28	Chiloscyllium punctatum	M	0	J	J	50.8	35.8	504.13	1.70586	2.70254	16.97	3.26	3.3662	0.646659
2016-08-10	1608	Hutan Melintang	HM	WP	100816HM29	Chiloscyllium punctatum	M	0	J	J	49	33.8	472.53	1.6902	2.67443	13.74	4.36	2.90775	0.922693
2016-08-10	1608	Hutan Melintang	HM	WP	100816HM30	Chiloscyllium punctatum	M	0	J	J	50.1	35.4	526.15	1.69984	2.72111	18.59	2.94	3.53321	0.558776
2016-08-10	1608	Hutan Melintang	HM	WP		Chiloscyllium hasseltii	M	1	A	A	71	52		1.85126
2016-08-10	1608	Hutan Melintang	HM	WP		Chiloscyllium hasseltii	M	1	A	A	65.5	47		1.81624
2016-08-10	1608	Hutan Melintang	HM	WP		Chiloscyllium hasseltii	M	0	S	S	60.5	43		1.78176
2016-08-10	1608	Hutan Melintang	HM	WP		Chiloscyllium hasseltii	M	1	A	A	69	49		1.83885
2016-08-10	1608	Hutan Melintang	HM	WP		Chiloscyllium hasseltii	M	1	A	A	64	47		1.80618
2016-08-10	1608	Hutan Melintang	HM	WP		Chiloscyllium hasseltii	M	1	A	A	61	44		1.78533
2016-08-10	1608	Hutan Melintang	HM	WP		Chiloscyllium hasseltii	M	1	A	A	67	49		1.82607
2016-08-10	1608	Hutan Melintang	HM	WP	100816HM31	Chiloscyllium hasseltii	M	1	A	A	77.5	55.3	1826.7	1.8893	3.26167	56.93	26.12	3.11655	1.4299
2016-08-10	1608	Hutan Melintang	HM	WP	100816HM32	Chiloscyllium hasseltii	M	1	A	A	73.5	52.5	1685.79	1.86629	3.2268	79.1	19.83	4.69216	1.1763
2016-08-10	1608	Hutan Melintang	HM	WP	100816HM33	Chiloscyllium hasseltii	F	1	Ag	A	67.7	48.9	1610.41	1.83059	3.20694	54.69	85.89	3.39603	5.33342
2016-08-10	1608	Hutan Melintang	HM	WP	100816HM34	Chiloscyllium hasseltii	F	1	Ag	A	66.5	48.5	1464.36	1.82282	3.16565	48.05	66.09	3.2813	4.51323
2016-08-10	1608	Hutan Melintang	HM	WP	100816HM35	Chiloscyllium hasseltii	M	0	J	J	46.5	32	349.3	1.66745	2.5432	13.23	2.36	3.78758	0.675637
2016-08-10	1608	Hutan Melintang	HM	WP	100816HM36	Chiloscyllium hasseltii	F	0	S	S	40.6	31.1	310.65	1.60853	2.49227	9.26	2.23	2.98085	0.71785
2016-08-10	1608	Hutan Melintang	HM	WP		Chiloscyllium hasseltii	M	1	A	A	58	41		1.76343
2016-08-10	1608	Hutan Melintang	HM	WP		Chiloscyllium hasseltii	M	0	J	J	50	36		1.69897
2016-08-10	1608	Hutan Melintang	HM	WP		Chiloscyllium hasseltii	M	1	A	A	62	45		1.79239
2016-08-10	1608	Hutan Melintang	HM	WP		Chiloscyllium hasseltii	M	0	S	S	56.5	40		1.75205
2016-08-10	1608	Hutan Melintang	HM	WP		Chiloscyllium hasseltii	M	0	S	S	58.5	41		1.76716
2016-08-10	1608	Hutan Melintang	HM	WP		Chiloscyllium hasseltii	M	1	A	A	74.5	54		1.87216
2016-08-10	1608	Hutan Melintang	HM	WP		Chiloscyllium hasseltii	M	1	A	A	59	43		1.77085
2016-08-10	1608	Hutan Melintang	HM	WP		Chiloscyllium hasseltii	M	0	S	S	58	42		1.76343
2016-08-10	1608	Hutan Melintang	HM	WP		Chiloscyllium hasseltii	M	1	A	A	67.5	46.5		1.8293
2016-08-10	1608	Hutan Melintang	HM	WP		Chiloscyllium hasseltii	M	0	S	S	57	40		1.75587
2016-08-10	1608	Hutan Melintang	HM	WP	100816HM7	Chiloscyllium hasseltii	M	1	A	A	70	49.9	1764.56	1.8451	3.24664	63.1	17.56	3.57596	0.995149
2016-08-10	1608	Hutan Melintang	HM	WP	100816HM8	Chiloscyllium hasseltii	F	1	Ag	A	64.9	46.2	1494.3	1.81224	3.17444	49.68	80.95	3.32463	5.41725
2016-08-10	1608	Hutan Melintang	HM	WP	100816HM9	Chiloscyllium hasseltii	F	1	Ag	A	59.1	41.9	1080.6	1.77159	3.03366	55.71	44.42	5.15547	4.11068
2016-08-10	1608	Hutan Melintang	HM	WP	100816HM10	Chiloscyllium hasseltii	F	1	Ang	A	53.1	37.5	697.37	1.72509	2.84346	35.07	11.33	5.02889	1.62468
2016-08-10	1608	Hutan Melintang	HM	WP	100816HM11	Chiloscyllium hasseltii	M	0	J	J	50	35.1	527.2	1.69897	2.72198	23.65	3.11	4.48596	0.589909
2016-08-10	1608	Hutan Melintang	HM	WP	100816HM12	Chiloscyllium hasseltii	F	0	S	S	44.9	31	362.68	1.65225	2.55952	14.25	1.86	3.92908	0.512849
2016-08-10	1608	Hutan Melintang	HM	WP	100816HM13	Chiloscyllium hasseltii	F	0	J	J	44.9	31.3	389.11	1.65225	2.59007	9.3	1.89	2.39007	0.485724
2016-08-10	1608	Hutan Melintang	HM	WP	100816HM14	Chiloscyllium punctatum	F	0	S	S	61	41.9	887.1	1.78533	2.94797	29.74	4.96	3.3525	0.559125
2016-08-11	1608	Hutan Melintang	HM	WP		Chiloscyllium hasseltii	M	0	J	J	56	39		1.74819
2016-08-11	1608	Hutan Melintang	HM	WP		Chiloscyllium hasseltii	M	0	S	S	67	48.5		1.82607
2016-08-11	1608	Hutan Melintang	HM	WP		Chiloscyllium hasseltii	M	0	J	J	54.5	38		1.7364
2016-08-11	1608	Hutan Melintang	HM	WP		Chiloscyllium hasseltii	M	0	S	S	69	50		1.83885
2016-08-11	1608	Hutan Melintang	HM	WP		Chiloscyllium hasseltii	M	0	J	J	56	39.5		1.74819
2016-08-11	1608	Hutan Melintang	HM	WP		Chiloscyllium hasseltii	M	0	S	S	67	48		1.82607
2016-08-11	1608	Hutan Melintang	HM	WP		Chiloscyllium hasseltii	M	0	J	J	56	39.5		1.74819
2016-08-11	1608	Hutan Melintang	HM	WP	110816HM16	Chiloscyllium hasseltii	M	1	A	A	70.5	50.9	1730.34	1.84819	3.23813	79.15	17.08	4.57425	0.987089
2016-08-11	1608	Hutan Melintang	HM	WP	110816HM17	Chiloscyllium hasseltii	F	1	Ag	A	67.1	48.6	1389.93	1.82672	3.14299	47.45	80.91	3.41384	5.82116
2016-08-11	1608	Hutan Melintang	HM	WP	110816HM18	Chiloscyllium hasseltii	F	1	Ag	A	64.4	46.4	1232.87	1.80889	3.09092	37.17	59.82	3.01492	4.85209
2016-08-11	1608	Hutan Melintang	HM	WP	110816HM19	Chiloscyllium hasseltii	M	0	J	J	52.9	38.1	615.66	1.72346	2.78934	23.58	3.38	3.83004	0.549004
2016-08-11	1608	Hutan Melintang	HM	WP	110816HM20	Chiloscyllium hasseltii	F	0	J	J	47.5	33	445.44	1.67669	2.64879	15.78	2.46	3.54256	0.552263
2016-08-11	1608	Hutan Melintang	HM	WP		Chiloscyllium punctatum	M	0	J	J	57.5	40		1.75967
2016-08-11	1608	Hutan Melintang	HM	WP		Chiloscyllium punctatum	M	1	A	A	83	61		1.91908
2016-08-11	1608	Hutan Melintang	HM	WP		Chiloscyllium punctatum	M	1	A	A	84	61		1.92428
2016-08-11	1608	Hutan Melintang	HM	WP		Chiloscyllium punctatum	M	1	A	A	86	62		1.9345
2016-08-11	1608	Hutan Melintang	HM	WP	110816HM21	Chiloscyllium punctatum	M	1	A	A	82.8	59.5	2443.19	1.91803	3.38796	79.54	22.54	3.25558	0.922564
2016-08-11	1608	Hutan Melintang	HM	WP	110816HM22	Chiloscyllium punctatum	M	1	A	A	89.5	64.3	2805.25	1.95182	3.44797	64.36	26.03	2.29427	0.927903
2016-08-11	1608	Hutan Melintang	HM	WP	110816HM23	Chiloscyllium punctatum	F	0	S	S	58	40.2	808.21	1.76343	2.90752	29.89	4.32	3.6983	0.534515
2016-08-11	1608	Hutan Melintang	HM	WP	110816HM24	Chiloscyllium punctatum	M	0	S	S	56.6	38.4	705.66	1.75282	2.8486	21.41	4.5	3.03404	0.637701
2016-08-11	1608	Hutan Melintang	HM	WP	110816HM25	Chiloscyllium punctatum	M	0	J	J	49.1	34.9	482.35	1.69108	2.68336	16.74	2.49	3.47051	0.516223
2016-08-11	1608	Hutan Melintang	HM	WP		Chiloscyllium hasseltii	M	0	J	J	53	38		1.72428
2016-08-11	1608	Hutan Melintang	HM	WP		Chiloscyllium hasseltii	M	0	S	S	61	44		1.78533
2016-08-11	1608	Hutan Melintang	HM	WP	110816HM1	Scoliodon laticaudus	M	1	A	A	39.3	30.5	239.32	1.59439	2.37898	7.48	3.5	3.12552	1.46248
2016-08-11	1608	Hutan Melintang	HM	WP	110816HM2	Scoliodon laticaudus	F	1	Ag	A	39.9	31	285.57	1.60097	2.45571	11.39		3.98851
2016-08-11	1608	Hutan Melintang	HM	WP	110816HM3	Scoliodon laticaudus	F	1	Ang	A	41.4	31.8	256.96	1.617	2.40987	10.47	1.71	4.07456	0.665473
2016-08-11	1608	Hutan Melintang	HM	WP	110816HM4	Scoliodon laticaudus	M	1	A	A	38	29.1	222.36	1.57978	2.34706	6.89	2.44	3.09858	1.09732
2016-08-11	1608	Hutan Melintang	HM	WP	110816HM5	Scoliodon laticaudus	F	1	Ang	A	42.8	32.6	243.69	1.63144	2.38684	7.43	1.31	3.04896	0.537568
2016-08-11	1608	Hutan Melintang	HM	WP	110816HM6	Scoliodon laticaudus	F	1	Ang	A	38.9	30.2	242.94	1.58995	2.3855	6.89		2.83609
2016-08-11	1608	Hutan Melintang	HM	WP	110816HM7	Scoliodon laticaudus	M	1	A	A	34.6	26.5	149.48	1.53908	2.17458	4.39	1.58	2.93685	1.057
2016-08-11	1608	Pasir Penambang	Selangor	WP	110816PPe1	Scoliodon laticaudus	F	1	Ag	A	46.4	36	385.72	1.66652	2.58627	17.87	2.68	4.63289	0.694805
2016-08-11	1608	Pasir Penambang	Selangor	WP	110816PPe2	Scoliodon laticaudus	F	1	Ang	A	46.2	35.5	365.93	1.66464	2.5634	12.51	1.35	3.41869	0.368923
2016-08-11	1608	Pasir Penambang	Selangor	WP	110816PPe3	Scoliodon laticaudus	F	1	Ang	A	40	31.2	229.44	1.60206	2.36067	6.51		2.83734
2016-08-11	1608	Pasir Penambang	Selangor	WP	110816PPe4	Scoliodon laticaudus	F	1	Ang	A	40.1	31.5	243.38	1.60314	2.38628	8.8		3.61574
2016-08-11	1608	Pasir Penambang	Selangor	WP	110816PPe5	Scoliodon laticaudus	F	1	Ang	A	40.4	31.1	254.92	1.60638	2.4064	5.84		2.29091
2016-08-11	1608	Pasir Penambang	Selangor	WP	110816PPe6	Scoliodon laticaudus	F	1	Ang	A	37.3	29.2	207.96	1.57171	2.31798	6.97		3.35161
2016-10-27	1610	Hutan Melintang	HM	WP		Chiloscyllium punctatum	M	0	S	S	64	44		1.80618
2016-10-27	1610	Hutan Melintang	HM	WP		Chiloscyllium punctatum	M	1	A	A	80	58		1.90309
2016-10-27	1610	Hutan Melintang	HM	WP		Chiloscyllium punctatum	M	0	S	S	62	44		1.79239
2016-10-27	1610	Hutan Melintang	HM	WP	271016HM1	Chiloscyllium punctatum	F	1	Ag	A	73.6	51.5	1987.62	1.86688	3.29833	113.81	87.52	5.72594	4.40326
2016-10-27	1610	Hutan Melintang	HM	WP	271016HM2	Chiloscyllium punctatum	M	1	A	A	75.1	52.9	1749.52	1.87564	3.24292	64.33	18.65	3.67701	1.06601
2016-10-27	1610	Hutan Melintang	HM	WP		Chiloscyllium hasseltii	M	0	S	S	59	42		1.77085
2016-10-27	1610	Hutan Melintang	HM	WP		Chiloscyllium hasseltii	M	1	A	A	67	48		1.82607
2016-10-27	1610	Hutan Melintang	HM	WP	271016HM3	Chiloscyllium hasseltii	M	1	A	A	74.1	54.1	2140.48	1.86982	3.33051	109.31	23.1	5.1068	1.0792
2016-10-27	1610	Hutan Melintang	HM	WP	271016HM4	Chiloscyllium hasseltii	F	1	Ag	A	66.5	47.1	1239.66	1.82282	3.0933	82.37	58.34	6.64456	4.70613
2016-10-27	1610	Hutan Melintang	HM	WP	271016HM5	Chiloscyllium hasseltii	M	1	A	A	59.3	42.1	954.77	1.77305	2.9799	42.92	10.59	4.49532	1.10917
2016-10-27	1610	Hutan Melintang	HM	WP	271016HM6	Chiloscyllium hasseltii	M	0	J	J	47.7	33.5	442.81	1.67852	2.64622	10.94	2.01	2.47059	0.453919
2016-10-27	1610	Hutan Melintang	HM	WP	271016HM7	Chiloscyllium hasseltii	M	0	J	J	46.5	32.6	429.38	1.66745	2.63284	14.62	2.27	3.40491	0.528669
2016-10-27	1610	Hutan Melintang	HM	WP	271016HM10	Chiloscyllium hasseltii	M	1	A	A	74.9	53.2	1974.33	1.87448	3.29542	132.03	27.61	6.68733	1.39845
2016-10-27	1610	Hutan Melintang	HM	WP	271016HM11	Chiloscyllium hasseltii	M	0	J	J	60	42.7	968.12	1.77815	2.98593	32.19	5.46	3.325	0.56398
2016-10-27	1610	Hutan Melintang	HM	WP	271016HM12	Chiloscyllium hasseltii	F	1	Ag	A	62.7	45.2	1230.23	1.79727	3.08999	41.98	72.13	3.41237	5.86313
2016-10-27	1610	Hutan Melintang	HM	WP		Chiloscyllium punctatum	M	0	J	J	64	46.5		1.80618
2016-10-27	1610	Hutan Melintang	HM	WP		Chiloscyllium punctatum	M	1	A	A	70	51		1.8451
2016-10-27	1610	Hutan Melintang	HM	WP		Chiloscyllium punctatum	M	1	A	A	90	69		1.95424
2016-10-27	1610	Hutan Melintang	HM	WP	271016HM8	Chiloscyllium punctatum	F	0	J	J	48.8	33.8	460.41	1.68842	2.66314	17.86		3.87915
2016-10-27	1610	Hutan Melintang	HM	WP	271016HM9	Chiloscyllium punctatum	M	0	J	J	46.9	32.2	471.4	1.67117	2.67339	19.16	4.15	4.06449	0.880356
2016-10-27	1610	Hutan Melintang	HM	WP		Chiloscyllium punctatum	M	0	S	S	65	46		1.81291
2016-10-27	1610	Hutan Melintang	HM	WP		Chiloscyllium punctatum	M	0	J	J	63.5	44		1.80277
2016-10-27	1610	Hutan Melintang	HM	WP		Chiloscyllium punctatum	M	1	A	A	92	68		1.96379
2016-10-27	1610	Hutan Melintang	HM	WP		Chiloscyllium punctatum	M	0	S	S	76	54		1.88081
2016-10-27	1610	Hutan Melintang	HM	WP	271016HM17	Chiloscyllium punctatum	M	1	A	A	84.8	60.3	3039.25	1.9284	3.48277	155.04	19.76	5.10126	0.65016
2016-10-27	1610	Hutan Melintang	HM	WP	271016HM18	Chiloscyllium punctatum	F	1	Ang	A	73.5	52.5	1804.59	1.86629	3.25638	94.26	8.9	5.22335	0.493187
2016-10-27	1610	Hutan Melintang	HM	WP	271016HM19	Chiloscyllium punctatum	M	0	J	J	61.5	42.8	908.21	1.78888	2.95819	32.73	4.2	3.60379	0.462448
2016-10-27	1610	Hutan Melintang	HM	WP	271016HM20	Chiloscyllium punctatum	M	0	J	J	65.8	45.1	1081.72	1.81823	3.03411	33.3	6.89	3.07843	0.636949
2016-10-27	1610	Sekincan	Selangor	WP	271016SK1	Scoliodon laticaudus	F	1	Ag	A	49.8	38.3	684.06	1.69723	2.83509	26.4	2.05	3.85931	0.299681
2016-10-27	1610	Sekincan	Selangor	WP	271016SK2	Scoliodon laticaudus	F	1	Ag	A	46.8	36.6	484.45	1.67025	2.68525	25.34	2.02	5.23067	0.416968
2016-10-27	1610	Sekincan	Selangor	WP	271016SK3	Scoliodon laticaudus	F	1	Ag	A	43.9	34.2	387.53	1.64246	2.58831	17.95	1.23	4.6319	0.317395
2016-10-27	1610	Sekincan	Selangor	WP	271016SK4	Scoliodon laticaudus	F	1	Ag	A	46.6	36	442.52	1.66839	2.64593	18.48		4.17608
2016-10-27	1610	Sekincan	Selangor	WP	271016SK5	Scoliodon laticaudus	M	1	A	A	41.2	32.2	268.02	1.6149	2.42817	8.76	3.27	3.26841	1.22006
2016-10-27	1610	Sekincan	Selangor	WP	271016SK6	Scoliodon laticaudus	M	1	A	A	31.5	24.5	114.12	1.49831	2.05736	2.45	1.26	2.14686	1.1041
2016-11-16	1611	Sandakan	Sandakan	Borneo		Chiloscyllium punctatum	M	0	J	J	49.5	34		1.69461
2016-11-16	1611	Sandakan	Sandakan	Borneo		Chiloscyllium punctatum	M	1	A	A	89	63		1.94939
2016-11-17	1611	Sandakan	Sandakan	Borneo		Chiloscyllium punctatum	M	0	J	J	46	32		1.66276
2016-11-17	1611	Sandakan	Sandakan	Borneo		Chiloscyllium punctatum	M	1	A	A	83	61		1.91908
2016-11-17	1611	Sandakan	Sandakan	Borneo		Chiloscyllium punctatum	M	0	J	J	53	36.5		1.72428
2016-11-18	1611	Sandakan	Sandakan	Borneo		Chiloscyllium punctatum	M	1	A	A	78	55		1.89209
2016-11-18	1611	Sandakan	Sandakan	Borneo		Chiloscyllium punctatum	M	0	J	J	68.5	48		1.83569
2016-11-19	1611	Sandakan	Sandakan	Borneo		Chiloscyllium punctatum	M	0	S	S	73	52		1.86332
2016-11-19	1611	Sandakan	Sandakan	Borneo		Chiloscyllium punctatum	M	0	S	S	68	47		1.83251
2016-11-19	1611	Sandakan	Sandakan	Borneo		Chiloscyllium punctatum	M	0	J	J	59.5	40.5		1.77452
2016-11-19	1611	Sandakan	Sandakan	Borneo		Chiloscyllium punctatum	M	0	J	J	63	44.5		1.79934
2016-11-19	1611	Sandakan	Sandakan	Borneo		Chiloscyllium punctatum	M	0	J	J	64	45.5		1.80618
2016-05-11	1605	53E	EP DOF	EP	53E-1	Chiloscyllium punctatum	M	1	A	A	91.5	67.2	3100	1.96142	3.49136	145	20	4.67742	0.645161
2016-05-11	1605	53E	EP DOF	EP	53E-2	Chiloscyllium punctatum	F	1	Ag	A	92.5	69.5	3700	1.96614	3.5682	110	150	2.97297	4.05405
2016-05-11	1605	44E	EP DOF	EP	44E-1	Chiloscyllium punctatum	M	0	J	J	67.5	48	1100	1.8293	3.04139	45	15	4.09091	1.36364
2016-05-11	1605	44E	EP DOF	EP	44E-2	Chiloscyllium punctatum	M	0	J	J	52	35.5	500	1.716	2.69897	20	12	4	2.4
2016-05-11	1605	37E	EP DOF	EP		Chiloscyllium punctatum	F	1	Ag	A	75.5	54		1.87795		100	60	#DIV/0!	#DIV/0!
2016-05-11	1605	37E	EP DOF	EP		Chiloscyllium punctatum	M	1	A	A	82.5	56.5		1.91645		80	20	#DIV/0!	#DIV/0!
2016-05-12	1605	32E	EP DOF	EP		Chiloscyllium punctatum	F	0	J	J	41.2	28	230	1.6149	2.36173
2016-05-12	1605	29E	EP DOF	EP		Chiloscyllium punctatum	M	1	A	A	33.2	24	2100	1.52114	3.32222	80	20	3.80952	0.952381
2016-05-12	1605	21E	EP DOF	EP		Chiloscyllium punctatum	F	0	J	J	73	52	1500	1.86332	3.17609	50	10	3.33333	0.666667
2016-05-13	1605	23E	EP DOF	EP	23E-1	Chiloscyllium punctatum	M	1	A	A	88.5	63.5	2500	1.94694	3.39794	125	20	5	0.8
2016-05-13	1605	23E	EP DOF	EP	23E-2	Chiloscyllium punctatum	F	1	Ag	A	78.3	56.5	1700	1.89376	3.23045	40	105	2.35294	6.17647
2016-05-13	1605	15E	EP DOF	EP	15E-1	Chiloscyllium punctatum	M	1	A	A	78	56.5	1800	1.89209	3.25527	70	20	3.88889	1.11111
2016-05-15	1605	9E	EP DOF	EP	9E-1	Chiloscyllium punctatum	M	1	A	A	77.5	54.6	1650	1.8893	3.21748	60	20	3.63636	1.21212
2016-05-16	1605	27E	EP DOF	EP	havent proces	Chiloscyllium punctatum	M	0	J	J	17.5	12.3		1.24304
2016-05-23	1605	68E	EP DOF	EP		Chiloscyllium punctatum	F	1	Ag	A	87	63	3200	1.93952	3.50515
2016-05-23	1605	69E	EP DOF	EP		Chiloscyllium punctatum	M	1	A	A	90	65	3000	1.95424	3.47712
2016-05-23	1605	69E	EP DOF	EP		Chiloscyllium punctatum	F	1	A	A	81	59	2200	1.90849	3.34242
2016-05-23	1605	69E	EP DOF	EP		Chiloscyllium punctatum	F	1	A	A	85.5	61	3000	1.93197	3.47712
2016-05-23	1605	69E	EP DOF	EP		Chiloscyllium punctatum	M	0	J	J	32.5	22		1.51188
2016-05-23	1605	69E	EP DOF	EP		Chiloscyllium punctatum	F	0	J	J	18	13		1.25527
2016-05-23	1605	70E	EP DOF	EP		Chiloscyllium punctatum	M	1	A	A	95	69	3000	1.97772	3.47712
2016-05-23	1605	70E	EP DOF	EP		Chiloscyllium punctatum	F	1	Ag	A	77.5	56	2000	1.8893	3.30103
2016-05-23	1605	70E	EP DOF	EP		Chiloscyllium punctatum	F	0	J	J	15	10.5	15	1.17609	1.17609
2016-05-23	1605	58E	EP DOF	EP		Chiloscyllium punctatum	M	1	A	A	84	61	3000	1.92428	3.47712
2016-05-24	1605	54E	EP DOF	EP		Chiloscyllium punctatum	M	1	A	A	88	64	3000	1.94448	3.47712
2016-05-24	1605	54E	EP DOF	EP		Chiloscyllium punctatum	F	1	Ag	A	80.5	58	2000	1.9058	3.30103
2016-05-24	1605	54E	EP DOF	EP		Chiloscyllium punctatum	F	0	J	J	39.5	27	250	1.5966	2.39794
2016-05-24	1605	45E	EP DOF	EP		Chiloscyllium punctatum	F	1	A	A	88	68	2800	1.94448	3.44716
2016-05-24	1605	45E	EP DOF	EP		Chiloscyllium punctatum	F	0	J	J	43.5	31.5	200	1.63849	2.30103
2016-05-24	1605	42E	EP DOF	EP		Chiloscyllium punctatum	F	1	A	A	76	58	2100	1.88081	3.32222
2016-05-24	1605	42E	EP DOF	EP		Chiloscyllium punctatum	M	1	A	A	79.5	59	1800	1.90037	3.25527
2016-05-24	1605	33E	EP DOF	EP		Chiloscyllium punctatum	F	1	A	A	78	57.5	1600	1.89209	3.20412
2016-05-24	1605	34E	EP DOF	EP		Chiloscyllium punctatum	M	1	A	A	85	63.5	2400	1.92942	3.38021
2016-05-24	1605	34E	EP DOF	EP		Chiloscyllium punctatum	F	0	J	J	58	42.5	750	1.76343	2.87506
2016-05-25	1605	78E	EP DOF	EP		Chiloscyllium punctatum	M	0	J	J	50.5	37.5	1000	1.70329	3
2016-05-26	1605	75E	EP DOF	EP		Chiloscyllium punctatum	M	0	J	J	52.5	36.5	350	1.72016	2.54407
2016-05-26	1605	79E	EP DOF	EP		Chiloscyllium punctatum	M	1	A	A	78	58	1800	1.89209	3.25527
2016-05-26	1605	79E	EP DOF	EP		Chiloscyllium punctatum	M	0	J	J	68	47.5	1000	1.83251	3
2016-05-26	1605	80E	EP DOF	EP		Chiloscyllium punctatum	M	0	J	J	14.5	10.5		1.16137
2016-05-26	1605	85E	EP DOF	EP		Chiloscyllium punctatum	F	1	Ag	A	85	61	3000	1.92942	3.47712
2016-05-26	1605	85E	EP DOF	EP		Chiloscyllium punctatum	M	1	A	A	77	55	1500	1.88649	3.17609
2016-05-26	1605	85E	EP DOF	EP		Chiloscyllium punctatum	M	1	A	A	73.6	51.5	1200	1.86688	3.07918
2016-05-26	1605	84E	EP DOF	EP		Chiloscyllium punctatum	M	1	A	A	87.5	63	3000	1.94201	3.47712
2016-05-27	1605	97E	EP DOF	EP		Chiloscyllium punctatum	M	0	J	J	64	44.5	900	1.80618	2.95424
2016-05-27	1605	101E	EP DOF	EP		Chiloscyllium punctatum	M	1	A	A	94	69	3000	1.97313	3.47712
2016-05-27	1605	101E	EP DOF	EP		Chiloscyllium punctatum	F	1	A	A	74	54	1500	1.86923	3.17609
2016-05-27	1605	101E	EP DOF	EP	101E-2	Chiloscyllium punctatum	M	0	J	J	14.2	9.4	9.63	1.15229	0.983626	0.17		1.76532
2016-06-01	1606	43E	EP DOF	EP		Chiloscyllium punctatum	F	1	A	A	90.5	68.5	2600	1.95665	3.41497
2016-06-01	1606	38E	EP DOF	EP		Chiloscyllium punctatum	F	1	A	A	78.5	60.5	2200	1.89487	3.34242
2016-06-01	1606	35E	EP DOF	EP		Chiloscyllium punctatum	F	1	A	A	77.5	55.5	1500	1.8893	3.17609
2016-06-02	1606	26E	EP DOF	EP		Chiloscyllium punctatum	F	0	J	J	25	15.2	30	1.39794	1.47712
2016-06-02	1606	26E	EP DOF	EP		Chiloscyllium punctatum	F	1	A	A	83.2	61.5	2500	1.92012	3.39794
2016-06-02	1606	25E	EP DOF	EP		Chiloscyllium punctatum	F	1	A	A	72.5	53.5	1600	1.86034	3.20412
2016-06-02	1606	12E	EP DOF	EP		Chiloscyllium punctatum	F	1	A	A	79	56.5	2000	1.89763	3.30103
2016-06-02	1606	12E	EP DOF	EP		Chiloscyllium punctatum	F	1	A	A	76.3	54.2	1800	1.88252	3.25527
2016-06-03	1606	46E	EP DOF	EP		Chiloscyllium punctatum	M	1	A	A	93.3	69.2	3200	1.96988	3.50515
2016-06-04	1606	60E	EP DOF	EP		Chiloscyllium punctatum	M	1	A	A	81.8	66.2	2500	1.91275	3.39794
2016-06-04	1606	61E	EP DOF	EP		Chiloscyllium punctatum	F	1	A	A	90.3	65.4	3200	1.95569	3.50515
2016-06-04	1606	61E	EP DOF	EP		Chiloscyllium punctatum	F	1	A	A	92.6	69.2	3200	1.96661	3.50515
2016-06-04	1606	61E	EP DOF	EP		Chiloscyllium punctatum	M	1	A	A	85.1	61	2800	1.92993	3.44716
2016-06-04	1606	65E	EP DOF	EP		Chiloscyllium punctatum	F	0	J	J	27.5	19.5	50	1.43933	1.69897
2016-06-04	1606	65E	EP DOF	EP		Chiloscyllium punctatum	M	0	J	J	33.5	24.5	130	1.52504	2.11394
2016-06-06	1606	86E	EP DOF	EP		Chiloscyllium punctatum	F	1	A	A	81	57.5	2050	1.90849	3.31175
2016-06-07	1606	88E	EP DOF	EP		Chiloscyllium punctatum	M	0	S	S	67.5	48.5	1100	1.8293	3.04139
2016-06-07	1606	88E	EP DOF	EP		Chiloscyllium punctatum	M	0	J	J	43.5	30.5	300	1.63849	2.47712
2016-06-13	1606	94E	EP DOF	EP		Chiloscyllium punctatum	F	0	J	J	66.7	53.7	750	1.82413	2.87506
2016-06-13	1606	98E	EP DOF	EP		Chiloscyllium punctatum	M	0	S	S	63.5	44.6	800	1.80277	2.90309
2016-06-15	1606	109E	EP DOF	EP		Chiloscyllium punctatum	M	0	S	S	42.5	43.5	800	1.62839	2.90309
2016-06-15	1606	109E	EP DOF	EP		Chiloscyllium punctatum	M	0	S	S	59.7	30.5	250	1.77597	2.39794
2016-06-15	1606	108E	EP DOF	EP		Chiloscyllium punctatum	M	1	A	A	75.7	55	1650	1.8791	3.21748
2016-06-15	1606	104E	EP DOF	EP		Chiloscyllium punctatum	M	1	A	A	84.6	61.3	2500	1.92737	3.39794
2016-06-15	1606	104E	EP DOF	EP		Chiloscyllium punctatum	M	1	A	A	88.4	64.5	2700	1.94645	3.43136
2016-06-15	1606	107E	EP DOF	EP		Chiloscyllium punctatum	M	0	S	S	65.2	46.7	950	1.81425	2.97772
2016-06-16	1606	119E	EP DOF	EP		Chiloscyllium punctatum	F	0	J	J	36.4	24.5	140	1.5611	2.14613
2016-06-16	1606	119E	EP DOF	EP		Chiloscyllium punctatum	F	0	J	J	26.9	18.9	50	1.42975	1.69897
2016-06-17	1606	118E	EP DOF	EP		Chiloscyllium punctatum	F	0	S	S	46.4	32.7	340	1.66652	2.53148
2016-06-17	1606	118E	EP DOF	EP		Chiloscyllium punctatum	M	0	J	J	16.1	11.3	20	1.20683	1.30103
2016-06-17	1606	106E	EP DOF	EP		Chiloscyllium punctatum	M	0	J	J	47.5	29.5	210	1.67669	2.32222
2016-06-17	1606	100E	EP DOF	EP		Chiloscyllium punctatum	F	0	J	J	62	44.3	700	1.79239	2.8451
2016-06-17	1606	100E	EP DOF	EP		Chiloscyllium punctatum	M	1	A	A	82.2	60.1	2300	1.91487	3.36173
2016-06-17	1606	100E	EP DOF	EP		Chiloscyllium punctatum	F	1	A	A	83.6	61.9	2700	1.92221	3.43136
2016-06-17	1606	113E	EP DOF	EP		Chiloscyllium punctatum	M	1	A	A	91	69.7	2700	1.95904	3.43136
2016-06-17	1606	113E	EP DOF	EP		Chiloscyllium punctatum	M	0	S	S	56.6	40	650	1.75282	2.81291
2016-06-18	1606	121E	EP DOF	EP		Chiloscyllium punctatum	M	1	A	A	78.5	58.5	1650	1.89487	3.21748
2016-06-22	1606	134E	EP DOF	EP		Chiloscyllium punctatum	F	1	Ag	A	79.3	57.8	2400	1.89927	3.38021
2016-06-23	1606	142E	EP DOF	EP		Chiloscyllium punctatum	M	0	S	S	51.8	36.6	430	1.71433	2.63347
2016-06-23	1606	142E	EP DOF	EP		Chiloscyllium punctatum	M	0	S	S	48	33.5	330	1.68124	2.51851
2016-06-25	1606	141E	EP DOF	EP		Chiloscyllium punctatum	M	1	A	A	82	63	2100	1.91381	3.32222
2016-06-25	1606	140E	EP DOF	EP		Chiloscyllium punctatum	F	1	Ag	A	91	67.2	3800	1.95904	3.57978
2016-06-25	1606	140E	EP DOF	EP		Chiloscyllium punctatum	M	1	A	A	77.8	56.6	2200	1.89098	3.34242
2016-06-25	1606	140E	EP DOF	EP		Chiloscyllium punctatum	F	1	Ang	A	72.7	53	2000	1.86153	3.30103
2016-06-25	1606	139E	EP DOF	EP		Chiloscyllium punctatum	F	1	Ang	A	80.5	60	2000	1.9058	3.30103
2016-06-25	1606	137E	EP DOF	EP		Chiloscyllium punctatum	M	1	A	A	83.5	62	2800	1.92169	3.44716
2016-06-25	1606	143E	EP DOF	EP		Chiloscyllium hasseltii	F	1	A	A	64.2	47.4	1200	1.80754	3.07918
2016-06-26	1606	128E	EP DOF	EP		Chiloscyllium punctatum	M	0	J	J	41.2	28.3	200	1.6149	2.30103
2016-06-30	1606	159E	EP DOF	EP		Chiloscyllium punctatum	F	1	Ag	A	71.3	59	1000	1.85309	3
2016-06-30	1606	159E	EP DOF	EP		Chiloscyllium punctatum	M	0	J	J	38	27.2	190	1.57978	2.27875
2016-07-01	1607	153E	EP DOF	EP		Chiloscyllium punctatum	M	0	J	J	24.4	19.4	30	1.38739	1.47712
2016-07-01	1607	154E	EP DOF	EP		Chiloscyllium punctatum	M	1	A	A	70.7	57.8	1000	1.84942	3
2016-07-01	1607	154E	EP DOF	EP		Chiloscyllium punctatum	F	0	J	J	28	22	60	1.44716	1.77815
2016-07-01	1607	160E	EP DOF	EP		Chiloscyllium punctatum	M	1	A	A	81.5	66.3	1800	1.91116	3.25527
2016-07-02	1607	122E	EP DOF	EP		Chiloscyllium punctatum	M	1	A	A	83	67.2	2200	1.91908	3.34242
2016-07-02	1607	126E	EP DOF	EP		Chiloscyllium punctatum	M	1	A	A	90.5	74	2200	1.95665	3.34242
2015-10-10	1510	42	Sarawak	Borneo	42-1	Chiloscyllium punctatum	M	1	A	A	77.5		1900	1.8893	3.27875
2015-10-11	1510	40	Sarawak	Borneo	40-1	Chiloscyllium punctatum	M	0	J	J	57.5		600	1.75967	2.77815
2015-10-11	1510	40	Sarawak	Borneo	40-2	Chiloscyllium punctatum	M	0	J	J	54		500	1.73239	2.69897
2015-10-14	1510	173	SB DOF	Borneo	173-1	Chiloscyllium punctatum	M	1	A	A	75.8		2000	1.87967	3.30103

## Sheet: Sheet3
Code	Species	Mother length (TL/DL)	No.	Egg length	Egg width	Embryo TL	Embryo sex	Remarks
151215MK2	Scoliodon macrorhynchos	39.5	7			3.9	F
151215MK2	Scoliodon macrorhynchos	39.5				4.1	F
151215MK2	Scoliodon macrorhynchos	39.5				4.3	F
151215MK2	Scoliodon macrorhynchos	39.5				4.3	F
151215MK2	Scoliodon macrorhynchos	39.5				4	F
151215MK2	Scoliodon macrorhynchos	39.5				4.1	M
151215MK2	Scoliodon macrorhynchos	39.5				4.1	M
151215MK3	Scoliodon macrorhynchos	35.1	4			3.8	F
151215MK3	Scoliodon macrorhynchos	35.1				3.9	F
151215MK3	Scoliodon macrorhynchos	35.1				4.2	F
151215MK3	Scoliodon macrorhynchos	35.1				4	M
151215MK6	Scoliodon macrorhynchos	34.7	5			7.3	F
151215MK6	Scoliodon macrorhynchos	34.7				7.8	F
151215MK6	Scoliodon macrorhynchos	34.7				7.8	F
151215MK6	Scoliodon macrorhynchos	34.7				8.4	F
151215MK6	Scoliodon macrorhynchos	34.7				8.2	M
161215MK2	Scoliodon macrorhynchos	28	1			2.2	-
161215MK16	Scoliodon macrorhynchos	44.5	9			10.4	M
161215MK16	Scoliodon macrorhynchos	44.5				10.3	M
161215MK16	Scoliodon macrorhynchos	44.5				9	M
161215MK16	Scoliodon macrorhynchos	44.5				9.7	F
161215MK16	Scoliodon macrorhynchos	44.5				9.3	F
161215MK16	Scoliodon macrorhynchos	44.5				8.8	F
161215MK16	Scoliodon macrorhynchos	44.5				9.7	F
161215MK16	Scoliodon macrorhynchos	44.5				9.5	F
161215MK16	Scoliodon macrorhynchos	44.5				9.5	M
161215MK17	Scoliodon macrorhynchos	45.2	14			3.2	F
161215MK17	Scoliodon macrorhynchos	45.2				3.1	M
161215MK17	Scoliodon macrorhynchos	45.2				3.2	F
161215MK17	Scoliodon macrorhynchos	45.2				3.4	M
161215MK17	Scoliodon macrorhynchos	45.2				3.4	F
161215MK17	Scoliodon macrorhynchos	45.2				3.4	F
161215MK17	Scoliodon macrorhynchos	45.2				3	F
161215MK17	Scoliodon macrorhynchos	45.2				2.8	M
161215MK17	Scoliodon macrorhynchos	45.2				3	M
161215MK17	Scoliodon macrorhynchos	45.2				3	F
161215MK17	Scoliodon macrorhynchos	45.2				3.4	F
161215MK17	Scoliodon macrorhynchos	45.2				3.2	M
161215MK17	Scoliodon macrorhynchos	45.2				3.4	F
161215MK17	Scoliodon macrorhynchos	45.2				3.1	F
161215MK18	Scoliodon macrorhynchos	43.2	10			4.5	F
161215MK18	Scoliodon macrorhynchos	43.2				4.2	F
161215MK18	Scoliodon macrorhynchos	43.2				4	F
161215MK18	Scoliodon macrorhynchos	43.2				4.5	F
161215MK18	Scoliodon macrorhynchos	43.2				4.6	F
161215MK18	Scoliodon macrorhynchos	43.2				4.6	M
161215MK18	Scoliodon macrorhynchos	43.2				4.7	M
161215MK18	Scoliodon macrorhynchos	43.2				4.9	F
161215MK18	Scoliodon macrorhynchos	43.2				4.7	M
161215MK18	Scoliodon macrorhynchos	43.2				4.6	F
161215MK19	Scoliodon macrorhynchos	44.7	10			10	F
161215MK19	Scoliodon macrorhynchos	44.7				9.5	F
161215MK19	Scoliodon macrorhynchos	44.7				9.7	M
161215MK19	Scoliodon macrorhynchos	44.7				9.2	F
161215MK19	Scoliodon macrorhynchos	44.7				9.2	F
161215MK19	Scoliodon macrorhynchos	44.7				9	F
161215MK19	Scoliodon macrorhynchos	44.7				9.25	F
161215MK19	Scoliodon macrorhynchos	44.7				9.6	F
161215MK19	Scoliodon macrorhynchos	44.7				8.9	M
161215MK19	Scoliodon macrorhynchos	44.7				8.7	M
161215MK20	Scoliodon macrorhynchos	43	8			10.1	M
161215MK20	Scoliodon macrorhynchos	43				10	M
161215MK20	Scoliodon macrorhynchos	43				10.4	F
161215MK20	Scoliodon macrorhynchos	43				10	F
161215MK20	Scoliodon macrorhynchos	43				9.8	F
161215MK20	Scoliodon macrorhynchos	43				10.1	M
161215MK20	Scoliodon macrorhynchos	43				9.9	F
161215MK20	Scoliodon macrorhynchos	43				10.1	M
161215MK21	Scoliodon macrorhynchos	38.7	4			10.7	M
161215MK21	Scoliodon macrorhynchos	38.7				9.4	M
161215MK21	Scoliodon macrorhynchos	38.7				10.5	F
161215MK21	Scoliodon macrorhynchos	38.7				4	-	Abnormal growth, slower rate and head region damage seriously with gill exposed
161215MK22	Scoliodon macrorhynchos	41.3	6			7.5	M
161215MK22	Scoliodon macrorhynchos	41.3				8.2	F
161215MK22	Scoliodon macrorhynchos	41.3				8.2	M
161215MK22	Scoliodon macrorhynchos	41.3				8	F
161215MK22	Scoliodon macrorhynchos	41.3				8.3	M
161215MK22	Scoliodon macrorhynchos	41.3				7.8	M
161215MK23	Scoliodon macrorhynchos	33	5			2.3	-	damaged, unable to identify sex
161215MK23	Scoliodon macrorhynchos	33				2.5	-
161215MK23	Scoliodon macrorhynchos	33				2.3	-
161215MK23	Scoliodon macrorhynchos	33				2.2	-
161215MK23	Scoliodon macrorhynchos	33				2.2	-
110116HM14	Chiloscyllium hasseltii	66.2	2	6.9	3.9
110116HM14	Chiloscyllium hasseltii	66.2		6.9	3.9
110116HM18	Chiloscyllium hasseltii	64	2	7.5	3.9
110116HM18	Chiloscyllium hasseltii	64		7.2	3.8
110116HM43	Scoliodon laticaudus	34.8	4			1.9		damaged, unable to identify sex
110116HM43	Scoliodon laticaudus	34.8				1.9
110116HM43	Scoliodon laticaudus	34.8				1.9
110116HM43	Scoliodon laticaudus	34.8				1.9
110116HM46	Scoliodon laticaudus	34.5	4			2		damaged, unable to identify sex
110116HM46	Scoliodon laticaudus	34.5				2
110116HM46	Scoliodon laticaudus	34.5				2
110116HM46	Scoliodon laticaudus	34.5				2
270116SB1	Scoliodon laticaudus	38.5	4			3.1	F
270116SB1	Scoliodon laticaudus	38.5				3	F
270116SB1	Scoliodon laticaudus	38.5				3.2	F
270116SB1	Scoliodon laticaudus	38.5				2.8	F
270116SB3	Scoliodon laticaudus	39.7	3			3	F
270116SB3	Scoliodon laticaudus	39.7				2.8	F
270116SB3	Scoliodon laticaudus	39.7				2.9	F
270116SB4	Scoliodon laticaudus	39.1	2			9.1	F
270116SB4	Scoliodon laticaudus	39.1				8.9	F
270116SK7	Scoliodon laticaudus	47.8	8			2
270116SK7	Scoliodon laticaudus	47.8				2.1
270116SK7	Scoliodon laticaudus	47.8				1.9
270116SK7	Scoliodon laticaudus	47.8				2
270116SK7	Scoliodon laticaudus	47.8				2
270116SK7	Scoliodon laticaudus	47.8				2.1
270116SK7	Scoliodon laticaudus	47.8				2.1
270116SK7	Scoliodon laticaudus	47.8				1.9
270116SK11	Scoliodon laticaudus	49.1	7			1.5
270116SK11	Scoliodon laticaudus	49.1				1.55
270116SK11	Scoliodon laticaudus	49.1				1.5
270116SK11	Scoliodon laticaudus	49.1				1.8
270116SK11	Scoliodon laticaudus	49.1				1.6
270116SK11	Scoliodon laticaudus	49.1				1.7
270116SK11	Scoliodon laticaudus	49.1				1.5
270116SK12	Scoliodon laticaudus	38.4	2			5.7	M
270116SK12	Scoliodon laticaudus	38.4				5.4	F
270116SK13	Scoliodon laticaudus	38.6	4			3.6	M
270116SK13	Scoliodon laticaudus	38.6				3.7	F
270116SK13	Scoliodon laticaudus	38.6				3.6	M
270116SK13	Scoliodon laticaudus	38.6				3.3	M
270116SK14	Scoliodon laticaudus	42.1	1			5	M	Abortion might occurred
220316HM14	Chiloscyllium punctatum	78.4	2	8	2.2
220316HM14	Chiloscyllium punctatum	78.4		7.3	3.3
220316HM31	Chiloscyllium hasseltii	56.5	2	7.1	3.5
220316HM31	Chiloscyllium hasseltii	56.5		7.5	3.3
220316HM32	Chiloscyllium hasseltii	62.7	3	7.9	3.7
220316HM32	Chiloscyllium hasseltii	62.7		7.6	3.9
220316HM32	Chiloscyllium hasseltii	62.7		7.6	3.7
030416MK15	Scoliodon macrorhynchos	43.4	3			6	F
030416MK15	Scoliodon macrorhynchos	43.4				6.2	F
030416MK15	Scoliodon macrorhynchos	43.4				6.3	F
230316HM6	Chiloscyllium hasseltii	51.2	2	7.15	3.1
230316HM6	Chiloscyllium hasseltii	51.2		7.1	3.4
230316HM10	Chiloscyllium hasseltii	65.3	2	7.8	3.6
230316HM10	Chiloscyllium hasseltii	65.3		7.3	4
230316HM11	Chiloscyllium hasseltii	58.7	2	7.6	3.7
230316HM11	Chiloscyllium hasseltii	58.7		7.3	3.8
230316HM16	Chiloscyllium punctatum	68.7	2	8.3	3.8
230316HM16	Chiloscyllium punctatum	68.7		8.2	3.8
040416MK6	Scoliodon macrorhynchos	37	2			12.5	F
040416MK6	Scoliodon macrorhynchos	37				13	F
050416MK1	Chiloscyllium punctatum	76	2	9	4.5
050416MK1	Chiloscyllium punctatum	76		9.5	4.5
050416MK2	Chiloscyllium punctatum	65.5	1	9	3.7
050416MK4	Chiloscyllium punctatum	68	2	7.5	3.4
050416MK4	Chiloscyllium punctatum	68		7.2	3.3
050416MK6	Chiloscyllium punctatum	74.5	2	8.5	4.1
050416MK6	Chiloscyllium punctatum	74.5		8.5	4.2
050416MK10	Chiloscyllium hasseltii	61	3	7.6	3.2
050416MK10	Chiloscyllium hasseltii	61		7.4	3.3
050416MK10	Chiloscyllium hasseltii	61		7.5	3.3
050416MK11	Chiloscyllium hasseltii	64.5	2	7.8	3.7
050416MK11	Chiloscyllium hasseltii	64.5		7.8	3.7
050416MK41	Scoliodon macrorhynchos	41.5	2			7.1	F
050416MK41	Scoliodon macrorhynchos	41.5				7.1	M
060416MK1	Scoliodon macrorhynchos	35.2	2			9.2	F
060416MK1	Scoliodon macrorhynchos	35.2				9.5	M
060416MK2	Scoliodon macrorhynchos	39.4	4			9.9	M
060416MK2	Scoliodon macrorhynchos	39.4				10.6	F
060416MK2	Scoliodon macrorhynchos	39.4				10.1	F
060416MK2	Scoliodon macrorhynchos	39.4				9.2	M
060416MK3	Scoliodon macrorhynchos	40.9	6			8.6	M
060416MK3	Scoliodon macrorhynchos	40.9				7.8	M
060416MK3	Scoliodon macrorhynchos	40.9				9	F
060416MK3	Scoliodon macrorhynchos	40.9				8.2	M
060416MK3	Scoliodon macrorhynchos	40.9				9.1	M
060416MK3	Scoliodon macrorhynchos	40.9				8.5	M
060416MK4	Scoliodon macrorhynchos	38.8	6			7	M
060416MK4	Scoliodon macrorhynchos	38.8				7.4	F
060416MK4	Scoliodon macrorhynchos	38.8				7.5	M
060416MK4	Scoliodon macrorhynchos	38.8				7.7	F
060416MK4	Scoliodon macrorhynchos	38.8				7.1	M
060416MK4	Scoliodon macrorhynchos	38.8				7.4	F
270416HM3	Chiloscyllium hasseltii	67.5	2	7.6	3.5
270416HM3	Chiloscyllium hasseltii	67.5		7.7	3.8
280416HM16	Chiloscyllium hasseltii	62.8	2	7.6	4
280416HM16	Chiloscyllium hasseltii	62.8		7.4	3.9
280416HM1	Chiloscyllium punctatum	73.9	1	9	3.9
280416SB5	Scoliodon laticaudus	35.4	3			1.2
280416SB5	Scoliodon laticaudus	35.4				1.3
280416SB5	Scoliodon laticaudus	35.4				1.2
280416PPe3	Scoliodon laticaudus	49.6	11			2.9
280416PPe3	Scoliodon laticaudus	49.6				2.9
280416PPe3	Scoliodon laticaudus	49.6				3
280416PPe3	Scoliodon laticaudus	49.6				2.8
280416PPe3	Scoliodon laticaudus	49.6				2.8
280416PPe3	Scoliodon laticaudus	49.6				2.9
280416PPe3	Scoliodon laticaudus	49.6				2.9
280416PPe3	Scoliodon laticaudus	49.6				3.1
280416PPe3	Scoliodon laticaudus	49.6				2.8
280416PPe3	Scoliodon laticaudus	49.6				2.8
280416PPe3	Scoliodon laticaudus	49.6				2.7
240616HM3	Chiloscyllium hasseltii	69.1	3	8.1	3.2
240616HM3	Chiloscyllium hasseltii	69.1		8	3.5
240616HM3	Chiloscyllium hasseltii	69.1		7.9	3.4
240616HM4	Chiloscyllium hasseltii	59.3	2	7.1	3.1
240616HM4	Chiloscyllium hasseltii	59.3		7	3.2
240616HM5	Chiloscyllium hasseltii	64	2	8.3	3.5
240616HM5	Chiloscyllium hasseltii	64		8.2	3.45
240616HM7	Chiloscyllium hasseltii	73.4	4	8.1	3.7
240616HM7	Chiloscyllium hasseltii	73.4		7.7	3.4
240616HM7	Chiloscyllium hasseltii	73.4		8.5	3.8
240616HM7	Chiloscyllium hasseltii	73.4		8.3	3.9
240616HM8	Chiloscyllium hasseltii	71	4	7.9	3.5
240616HM8	Chiloscyllium hasseltii	71		7.8	3.5
240616HM8	Chiloscyllium hasseltii	71		7.7	3.5
240616HM8	Chiloscyllium hasseltii	71		7.7	3.4
270716HM1	Scoliodon laticaudus	46.6	10			5.5	F
270716HM1	Scoliodon laticaudus	46.6				5.3	M
270716HM1	Scoliodon laticaudus	46.6				5.5	F
270716HM1	Scoliodon laticaudus	46.6				5.6	M
270716HM1	Scoliodon laticaudus	46.6				5.3	F
270716HM1	Scoliodon laticaudus	46.6				5.2	F
270716HM1	Scoliodon laticaudus	46.6				5.6	F
270716HM1	Scoliodon laticaudus	46.6				5.4	M
270716HM1	Scoliodon laticaudus	46.6				5.9	F
270716HM1	Scoliodon laticaudus	46.6				5.5	F
270716HM13	Chiloscyllium punctatum	74.2	2	8.7	4
270716HM13	Chiloscyllium punctatum	74.2		8.8	4.1
270716HM14	Chiloscyllium punctatum	80.1	2	9.4	4.3
270716HM14	Chiloscyllium punctatum	80.1		9.3	4.4
280716HM11	Scoliodon laticaudus	45.2	8			2.1
280716HM11	Scoliodon laticaudus	45.2				2.3
280716HM11	Scoliodon laticaudus	45.2				2.5
280716HM11	Scoliodon laticaudus	45.2				2.3
280716HM11	Scoliodon laticaudus	45.2				2.2
280716HM11	Scoliodon laticaudus	45.2				2.2
280716HM11	Scoliodon laticaudus	45.2				2.3
280716HM11	Scoliodon laticaudus	45.2				2.4
280716HM16	Scoliodon laticaudus	51.3	4			9.5	F	maybe aborted right side uterus
280716HM16	Scoliodon laticaudus	51.3				11.2	F
280716HM16	Scoliodon laticaudus	51.3				12.5	F
280716HM16	Scoliodon laticaudus	51.3				11.7	M
280716HM18	Scoliodon laticaudus	39.7	3			2.8	F
280716HM18	Scoliodon laticaudus	39.7				2.7	F
280716HM18	Scoliodon laticaudus	39.7				2.8	F
280716HM19	Scoliodon laticaudus	44.5	5			6.2	M
280716HM19	Scoliodon laticaudus	44.5				6	M
280716HM19	Scoliodon laticaudus	44.5				6.3	F
280716HM19	Scoliodon laticaudus	44.5				6	M
280716HM19	Scoliodon laticaudus	44.5				6.2	M
280716HM20	Scoliodon laticaudus	46.3	6			6	F
280716HM20	Scoliodon laticaudus	46.3				5.6	M
280716HM20	Scoliodon laticaudus	46.3				5.9	F
280716HM20	Scoliodon laticaudus	46.3				6.2	M
280716HM20	Scoliodon laticaudus	46.3				5.9	M
280716HM20	Scoliodon laticaudus	46.3				5.8	F
280716HM23	Scoliodon laticaudus	31.3	3			4.7	F
280716HM23	Scoliodon laticaudus	31.3				4.6	F
280716HM23	Scoliodon laticaudus	31.3				4.7	M
280716HM25	Scoliodon laticaudus	31.8	4			2.3	F
280716HM25	Scoliodon laticaudus	31.8				2.2	F
280716HM25	Scoliodon laticaudus	31.8				2.2	F
280716HM25	Scoliodon laticaudus	31.8				2.2	F
280716HM27	Scoliodon laticaudus	34.4	4			7.1	F
280716HM27	Scoliodon laticaudus	34.4				7.4	F
280716HM27	Scoliodon laticaudus	34.4				7.2	F
280716HM27	Scoliodon laticaudus	34.4				7.3	M
100816HM33	Chiloscyllium hasseltii	67.7	4	7.7	3.8
100816HM33	Chiloscyllium hasseltii	67.7		7.6	3.9
100816HM33	Chiloscyllium hasseltii	67.7		7.65	3.8
100816HM33	Chiloscyllium hasseltii	67.7		7.7	3.8
100816HM34	Chiloscyllium hasseltii	66.5	3	7.5	3.95
100816HM34	Chiloscyllium hasseltii	66.5		7.5	3.9
100816HM34	Chiloscyllium hasseltii	66.5		7.4	4.1
100816HM8	Chiloscyllium hasseltii	64.9	2	8.6	3.9
100816HM8	Chiloscyllium hasseltii	64.9		8.2	3.7
100816HM9	Chiloscyllium hasseltii	59.1	1	7.7	3.35
110816HM17	Chiloscyllium hasseltii	67.1	2	7.7	3.75
110816HM17	Chiloscyllium hasseltii	67.1		7.6	3.7
110816HM18	Chiloscyllium hasseltii	64.4	2	7.8	3.6
110816HM18	Chiloscyllium hasseltii	64.4		7.9	3.6
110816HM2	Scoliodon laticaudus	39.9	4			2.7	F
110816HM2	Scoliodon laticaudus	39.9				2.7	F
110816HM2	Scoliodon laticaudus	39.9				2.8	F
110816HM2	Scoliodon laticaudus	39.9				2.75	F
110816PPe1	Scoliodon laticaudus	46.4	12			2	ND	no sexual differentiation
110816PPe1	Scoliodon laticaudus	46.4				1.8	ND	no sexual differentiation
110816PPe1	Scoliodon laticaudus	46.4				1.9	ND	no sexual differentiation
110816PPe1	Scoliodon laticaudus	46.4				2	ND	no sexual differentiation
110816PPe1	Scoliodon laticaudus	46.4				2	ND	no sexual differentiation
110816PPe1	Scoliodon laticaudus	46.4				2	ND	no sexual differentiation
110816PPe1	Scoliodon laticaudus	46.4				1.95	ND	no sexual differentiation
110816PPe1	Scoliodon laticaudus	46.4				2	ND	no sexual differentiation
110816PPe1	Scoliodon laticaudus	46.4				1.9	ND	no sexual differentiation
110816PPe1	Scoliodon laticaudus	46.4				2.05	ND	no sexual differentiation
110816PPe1	Scoliodon laticaudus	46.4				2	ND	no sexual differentiation
110816PPe1	Scoliodon laticaudus	46.4				2.05	ND	no sexual differentiation
271016HM1	Chiloscyllium punctatum	73.6	2	9	3.8
271016HM1	Chiloscyllium punctatum	73.6		8.9	3.8
271016HM4	Chiloscyllium hasseltii	66.5	2	8.2	3.6
271016HM4	Chiloscyllium hasseltii	66.5		8.3	3.5
271016HM12	Chiloscyllium hasseltii	62.7	2	7.8	3.6
271016HM12	Chiloscyllium hasseltii	62.7		7.6	3.7
271016SK1	Scoliodon laticaudus	49.8	8			8.8	M
271016SK1	Scoliodon laticaudus	49.8				9	F
271016SK1	Scoliodon laticaudus	49.8				8.2	F
271016SK1	Scoliodon laticaudus	49.8				9.2	M
271016SK1	Scoliodon laticaudus	49.8				8.8	F
271016SK1	Scoliodon laticaudus	49.8				8.6	M
271016SK1	Scoliodon laticaudus	49.8				9.3	M
271016SK1	Scoliodon laticaudus	49.8				8.5	M
271016SK2	Scoliodon laticaudus	46.8	9			1.9	ND	no sexual differentiation
271016SK2	Scoliodon laticaudus	46.8				2.3	ND	no sexual differentiation
271016SK2	Scoliodon laticaudus	46.8				2.3	ND	no sexual differentiation
271016SK2	Scoliodon laticaudus	46.8				2.3	ND	no sexual differentiation
271016SK2	Scoliodon laticaudus	46.8				2	ND	no sexual differentiation
271016SK2	Scoliodon laticaudus	46.8				2.1	ND	no sexual differentiation
271016SK2	Scoliodon laticaudus	46.8				2.2	ND	no sexual differentiation
271016SK2	Scoliodon laticaudus	46.8				2.3	ND	no sexual differentiation
271016SK2	Scoliodon laticaudus	46.8				2.2	ND	no sexual differentiation
271016SK3	Scoliodon laticaudus	43.9	9			3.7	F
271016SK3	Scoliodon laticaudus	43.9				3.5	F
271016SK3	Scoliodon laticaudus	43.9				3.65	M
271016SK3	Scoliodon laticaudus	43.9				3.8	F
271016SK3	Scoliodon laticaudus	43.9				3.8	F
271016SK3	Scoliodon laticaudus	43.9				4.1	F
271016SK3	Scoliodon laticaudus	43.9				3.8	M
271016SK3	Scoliodon laticaudus	43.9				3.75	M
271016SK3	Scoliodon laticaudus	43.9				3.8	F
271016SK4	Scoliodon laticaudus	46.6	4			3.8	F
271016SK4	Scoliodon laticaudus	46.6				3.9	F
271016SK4	Scoliodon laticaudus	46.6				3.8	M
271016SK4	Scoliodon laticaudus	46.6				1	-	underdeveloped, abnormal
190617HM12	Chiloscyllium punctatum	84.5	2	10	4.7
190617HM12	Chiloscyllium punctatum	84.5		10.4	4.6
200617HM7	Chiloscyllium hasseltii	63.6	4	7.9	3.9
200617HM7	Chiloscyllium hasseltii	63.6		7.6	3.8
200617HM7	Chiloscyllium hasseltii	63.6		7.5	3.9
200617HM7	Chiloscyllium hasseltii	63.6		7.7	3.9
210717HM6	Chiloscyllium punctatum	77.2	1	9	4
210717HM11	Chiloscyllium hasseltii	64.3	2	7.7	3.8
210717HM11	Chiloscyllium hasseltii	64.3		7.5	3.9
210717HM12	Chiloscyllium hasseltii	64.8	2	7.7	3.5
210717HM12	Chiloscyllium hasseltii	64.8		7.6	3.5
210717HM13	Chiloscyllium hasseltii	60.5	2	7.8	3.6
210717HM13	Chiloscyllium hasseltii	60.5		7.9	3.6
